# Supplementary material for: Molecular epidemiology of a primarily MSM acute HIV‐1 cohort in Bangkok, Thailand and connections within networks of transmission in Asia
Source: PubMed Central journal article supplement (PMC6282942; doi:10.1002/jia2.25204), 2018-11-22
Supplement: JIA2-21-e25204-s002.pdf [file JIA2-21-e25204-s002.pdf]

## Supporting Information

### **Molecular epidemiology of a primarily MSM acute HIV-1 cohort in Bangkok, Thailand and connections within networks of transmission in Asia**

David Chang<sup>1,2</sup>, Eric Sanders-Buell<sup>1,2</sup>, Meera Bose<sup>1,2</sup>, Anne Marie O'Sullivan<sup>1,2</sup>, Phuc Pham<sup>1,2</sup>, Eugene Kroon<sup>3</sup>, Donn J. Colby<sup>3</sup>, Rujipas Sirijatuphat<sup>1,4</sup>, Erik Billings<sup>1,2</sup>, Suteeraporn Pinyakorn<sup>1,2</sup>, Nitiya Chomchey<sup>3</sup>, Wiriya Rutvisuttinunt<sup>5,6</sup>, Gustavo Kijak<sup>1,2,#</sup>, Mark de Souza<sup>2,3</sup>, Jean-Louis Excler<sup>1,2</sup>, Praphan Phanuphak<sup>7</sup>, Nittaya Phanuphak<sup>7</sup>, Robert J. O'Connell<sup>1,5</sup>, Jerome H. Kim<sup>1,8</sup>, Merlin L. Robb<sup>1,2</sup>, Nelson L. Michael<sup>1</sup>, Jintanat Ananworanich<sup>1,2,3,9</sup>, and Sodsai Tovanabutra<sup>1,2,§</sup>, on behalf of the RV254/SEARCH 010 Study Group

<sup>1</sup> United States Military HIV Research Program, Walter Reed Army Institute of Research, Silver Spring, MD, USA

<sup>2</sup> The Henry M. Jackson Foundation for the Advancement of Military Medicine, Bethesda, MD, USA

<sup>3</sup> SEARCH, Bangkok, Thailand

<sup>4</sup> Department of Medicine, Faculty of Medicine Siriraj Hospital, Mahidol University, Bangkok, Thailand

<sup>5</sup> Department of Retrovirology, Armed Forces Research Institute of Medical Sciences, Bangkok, Thailand

<sup>6</sup> Viral Diseases Branch, Walter Reed Army Institute of Research, Silver Spring, MD, USA

<sup>7</sup> The Thai Red Cross AIDS Research Centre, Bangkok, Thailand

<sup>8</sup> International Vaccine Institute, Seoul, South Korea

<sup>9</sup> Department of Global Health, Academic Medical Center, University of Amsterdam, Amsterdam, The Netherlands

<sup>#</sup> Present affiliation: GSK Vaccines, Rockville, MD, USA

<sup>§</sup> Corresponding Author: Sodsai Tovanabutra

503 Robert Grant Avenue, Room 2N25

Silver Spring, MD 20910

USA

Phone: +1 301 319 9993

Email: stovanabutra@hivresearch.org

## Figure Legends for Supporting Information:

**Figure S1.** Phylogenetic tree of subtype B strains from RV254 participants with reference Western subtype B (right tree branches) and Thai B' strains (left tree branch). Pure subtype B strains from RV254 participants were primarily Western B (light blue circles, n=7), versus Thai B' (dark blue circles, n=1). Subtype J (open triangles) is plotted as an outsider group.

**Figure S2.** Phylogenetic tree of *env* gp160 gene sequences from RV254 participants. Colored circles depict RV254 subtyping by phylogenetic analysis: subtype CRF01\_AE (red), CRF01\_AE/B recombinant (purple), B (light blue), B' (dark blue), C (yellow), CRF01\_AE/B/C recombinant (green), and CRF01\_AE/CRF02\_AG recombinant (grey).

**Table S1.** Summary and details of RV254 and subtype reference sequences included in the present analysis. a) Summary of sequences from RV254 participants obtained by single genome sequencing, b) Details of sequences listed by participant ID; FL = full genome, LH = 5'- half genome, RH = 3' half genome, LH+RH = 5'- and 3'- half genomes, ENV = envelope gene only, c) Details of subtype reference sequences (full genome), d) Details of subtype B, B', and J reference sequences (*env* gp160).

**Table S2.** Details of Asia *env* gp160 sequences downloaded from the Los Alamos National Laboratory (LANL) HIV Database and included in the present analysis.

**Table S3.** Socio-demographic characteristics of RV254 study participants.

**Table S4.** RV254 subtype B V3 loop tip motifs and their global frequencies.

**Table S5.** Clusters identified in Asian HIV-1 transmission network.

**Table S6.** Description of nodes identified in Asian HIV-1 Transmission Network. a) Summary of nodes, b) Detailed list of nodes. Country codes: China (CN), India (IN), Indonesia (ID), Japan (JP), Malaysia (MY), Myanmar (MM), Pakistan (PK), Singapore (SG), South Korea (KR),

Taiwan (TW), Thailand (TH), Vietnam (VN). Risk factors: Blood transfusion (PB), hemophiliac (PH), heterosexual (SH), homosexual (SG), people who inject drugs (PWID), men who have sex with men (MSM), mother to child (MB), nosocomial (NO), unknown (N/A).

**File S1.** Alignment of RV254 and Asia *env* gp160 sequences used in the present analysis.





**Table S1. Summary and details of RV254 and subtype reference sequences included in the present analysis**

a) Summary of sequences from RV254 participants obtained by single genome sequencing

| Genomic Region                                                     | Number of Individuals (n=138) |
|--------------------------------------------------------------------|-------------------------------|
| Full genome (FL)                                                   | 80                            |
| Corresponding half genomes (both 5'- and 3'- half genomes) (LH+RH) | 45                            |
| 5'- single half genome only (LH)                                   | 3                             |
| 3'- single half genome only (RH)                                   | 6                             |
| Envelope gene only (ENV)                                           | 4                             |
| <b>Sampling Year</b>                                               |                               |
| 2009                                                               | 10                            |
| 2010                                                               | 22                            |
| 2011                                                               | 25                            |
| 2012                                                               | 8                             |
| 2013                                                               | 17                            |
| 2014                                                               | 29                            |
| 2015                                                               | 27                            |
| <b>Subtype by Sequencing</b>                                       |                               |
| CRF01 AE                                                           | 88                            |
| CRF01 AE/B Recombinant                                             | 30                            |
| B                                                                  | 8                             |
| CRF01 AE (RH)                                                      | 4                             |
| CRF01 AE (LH)                                                      | 3                             |
| CRF01 AE/B Recombinant (RH)                                        | 2                             |
| CRF01 AE/CRF02 AG recombinant                                      | 1                             |
| CRF01 AE/B/C Recombinant                                           | 1                             |
| C                                                                  | 1                             |

b) Details of RV254 sequences listed by participant ID

| Participant ID | Sequence Name    | Subtype by Sequencing  | Genome Region | Sampling Year | GenBank Accession |
|----------------|------------------|------------------------|---------------|---------------|-------------------|
| 2543928        | 2543928P000L Sb  | CRF01 AE               | LH            | 2009          | MG989627          |
| 2543928        | 2543928P000R Sa  | CRF01 AE               | RH            | 2009          | MG989577          |
| 2544933        | 2544933P000L Sf  | CRF01 AE/B Recombinant | LH            | 2009          | MG989634          |
| 2544933        | 2544933P000R Se  | CRF01 AE/B Recombinant | RH            | 2009          | MG989584          |
| 2545131        | 2545131P000L Sb  | CRF01 AE/B Recombinant | LH            | 2009          | MG989636          |
| 2545131        | 2545131P000R Sk  | CRF01 AE/B Recombinant | RH            | 2009          | MG989586          |
| 2545573        | 2545573P000L Sb  | CRF01 AE               | LH            | 2009          | MG989640          |
| 2545573        | 2545573P000R Sd  | CRF01 AE               | RH            | 2009          | MG989591          |
| 2545577        | 2545577P000L Sa  | CRF01 AE               | LH            | 2009          | MG989641          |
| 2545577        | 2545577P000R Sd  | CRF01 AE               | RH            | 2009          | MG989592          |
| 2546083        | 2546083P000L Sa  | CRF01 AE               | LH            | 2009          | MG989642          |
| 2546083        | 2546083P000R Sc  | CRF01 AE               | RH            | 2009          | MG989593          |
| 2547933        | 2547933P000L Sa  | CRF01 AE               | LH            | 2009          | MG989656          |
| 2547933        | 2547933P000R Sa  | CRF01 AE               | RH            | 2009          | MG989606          |
| 2548262        | 2548262P000L Sb  | CRF01 AE               | LH            | 2009          | MG989659          |
| 2548262        | 2548262P000R Sj  | CRF01 AE               | RH            | 2009          | MG989609          |
| 2548442        | 2548442P000R Sd  | CRF01 AE               | RH            | 2009          | MG989611          |
| 2549720        | 2549720P000L Sd  | B                      | LH            | 2009          | MG989667          |
| 2549720        | 2549720P000R Sd  | B                      | RH            | 2009          | MG989620          |
| 2543625        | 2543625P000FL Sc | CRF01 AE               | FL            | 2010          | MG989497          |
| 2543698        | 2543698P000L Sa  | CRF01 AE               | LH            | 2010          | MG989626          |
| 2543698        | 2543698P000R Sa  | CRF01 AE               | RH            | 2010          | MG989575          |
| 2543733        | 2543733P000FL Sb | CRF01 AE               | FL            | 2010          | MG989499          |
| 2543789        | 2543789P000FL Sc | CRF01 AE               | FL            | 2010          | MG989500          |
| 2543832        | 2543832P000FL Si | CRF01 AE               | FL            | 2010          | MG989502          |
| 2544011        | 2544011P000L Sd  | B                      | LH            | 2010          | MG989628          |
| 2544011        | 2544011P000R Sa  | B                      | RH            | 2010          | MG989578          |
| 2544617        | 2544617P000L Sa  | CRF01 AE               | LH            | 2010          | MG989631          |
| 2544617        | 2544617P000R Sa  | CRF01 AE               | RH            | 2010          | MG989581          |
| 2545113        | 2545113P000FL Sb | CRF01 AE               | FL            | 2010          | MG989515          |
| 2545192        | 2545192P000L Sa  | B                      | LH            | 2010          | MG989637          |
| 2545192        | 2545192P000R Sd  | B                      | RH            | 2010          | MG989587          |
| 2545374        | 2545374P000FL Sj | CRF01 AE               | FL            | 2010          | MG989517          |

|         |                    |                               |     |      |          |
|---------|--------------------|-------------------------------|-----|------|----------|
| 2545436 | 2545436P000FL Sa   | CRF01 AE                      | FL  | 2010 | MG989521 |
| 2546303 | 2546303P000L Sa    | CRF01 AE                      | LH  | 2010 | MG989645 |
| 2546303 | 2546303P000R Sa    | CRF01 AE                      | RH  | 2010 | MG989596 |
| 2546308 | 2546308P000L Sb    | CRF01 AE                      | LH  | 2010 | MG989646 |
| 2546308 | 2546308P000R Sa    | CRF01 AE                      | RH  | 2010 | MG989597 |
| 2546609 | 2546609P000FL Sa   | CRF01 AE                      | FL  | 2010 | MG989530 |
| 2547122 | 2547122P000L Sa    | CRF01 AE                      | LH  | 2010 | MG989651 |
| 2547122 | 2547122P000R Sb    | CRF01 AE                      | RH  | 2010 | MG989601 |
| 2547973 | 2547973P000L Sb    | CRF01 AE                      | LH  | 2010 | MG989657 |
| 2547973 | 2547973P000R Sa    | CRF01 AE                      | RH  | 2010 | MG989607 |
| 2548388 | 2548388P000FL Sa   | CRF01 AE/B Recombinant        | FL  | 2010 | MG989549 |
| 2548950 | 2548950P000FL Sa   | CRF01 AE                      | FL  | 2010 | MG989559 |
| 2549133 | 2549133P000FL Sc   | CRF01 AE                      | FL  | 2010 | MG989562 |
| 2549196 | 2549196P000L Sc    | CRF01 AE                      | LH  | 2010 | MG989663 |
| 2549196 | 2549196P000R Sn    | CRF01 AE                      | RH  | 2010 | MG989615 |
| 2549583 | 2549583P000FL Sj   | CRF01 AE                      | FL  | 2010 | MG989566 |
| 2549844 | 2549844P000FL Sc   | CRF01 AE                      | FL  | 2010 | MG989569 |
| 2543077 | 2543077P000R Sc    | CRF01 AE (RH)                 | RH  | 2011 | MG989570 |
| 2543467 | 2543467P000FL Sa   | CRF01 AE/B Recombinant        | FL  | 2011 | MG989493 |
| 2543513 | 2543513P000FL Sj   | CRF01 AE                      | FL  | 2011 | MG989495 |
| 2544022 | 2544022P000FL Sg   | CRF01 AE                      | FL  | 2011 | MG989504 |
| 2544030 | 2544030P000L Sb    | CRF01 AE                      | LH  | 2011 | MG989629 |
| 2544030 | 2544030P000R Sf    | CRF01 AE                      | RH  | 2011 | MG989579 |
| 2544574 | 2544574P000FL Sa   | CRF01 AE                      | FL  | 2011 | MG989510 |
| 2544735 | 2544735P000L Se    | CRF01 AE                      | LH  | 2011 | MG989632 |
| 2544735 | 2544735P000R Sc    | CRF01 AE                      | RH  | 2011 | MG989582 |
| 2545349 | 2545349P000FL Sa   | CRF01 AE                      | FL  | 2011 | MG989516 |
| 2545529 | 2545529P000L Sa    | CRF01 AE                      | LH  | 2011 | MG989639 |
| 2545529 | 2545529P000R Sc    | CRF01 AE                      | RH  | 2011 | MG989590 |
| 2546154 | 2546154P000FL Sb   | CRF01 AE                      | FL  | 2011 | MG989525 |
| 2546340 | 2546340P000FL Sg   | CRF01 AE                      | FL  | 2011 | MG989527 |
| 2546355 | 2546355P000L Sb    | CRF01 AE/B Recombinant        | LH  | 2011 | MG989647 |
| 2546355 | 2546355P000R Sf    | CRF01 AE/B Recombinant        | RH  | 2011 | MG989598 |
| 2547010 | 2547010P000L Sb    | CRF01 AE                      | LH  | 2011 | MG989650 |
| 2547010 | 2547010P000R Sf    | CRF01 AE                      | RH  | 2011 | MG989600 |
| 2547242 | 2547242P000FL S04  | CRF01 AE/B/C Recombinant      | FL  | 2011 | MG989536 |
| 2547453 | 2547453P000L Sa    | CRF01 AE                      | LH  | 2011 | MG989652 |
| 2547453 | 2547453P000R Sb    | CRF01 AE                      | RH  | 2011 | MG989602 |
| 2547681 | 2547681P000L Sa    | CRF01 AE                      | LH  | 2011 | MG989654 |
| 2547681 | 2547681P000R Sb    | CRF01 AE                      | RH  | 2011 | MG989604 |
| 2547905 | 2547905P000FL Sb   | CRF01 AE                      | FL  | 2011 | MG989542 |
| 2548123 | 2548123P000L Sd    | CRF01 AE                      | LH  | 2011 | MG989658 |
| 2548123 | 2548123P000R Sa    | CRF01 AE                      | RH  | 2011 | MG989608 |
| 2548178 | 2548178P000FL Sa   | CRF01 AE                      | FL  | 2011 | MG989544 |
| 2548397 | 2548397P000FL Sc   | CRF01 AE/CRF02 AG recombinant | FL  | 2011 | MG989550 |
| 2548534 | 2548534P000env S23 | CRF01 AE                      | ENV | 2011 | MG989671 |
| 2549114 | 2549114P000FL Sa   | CRF01 AE                      | FL  | 2011 | MG989561 |
| 2549129 | 2549129P000L Sb    | CRF01 AE (LH)                 | LH  | 2011 | MG989662 |
| 2549533 | 2549533P000FL Sj   | CRF01 AE                      | FL  | 2011 | MG989565 |
| 2549574 | 2549574P000L Sa    | CRF01 AE                      | LH  | 2011 | MG989664 |
| 2549574 | 2549574P000R Se    | CRF01 AE                      | RH  | 2011 | MG989617 |
| 2543193 | 2543193P000FL Sc   | CRF01 AE                      | FL  | 2012 | MG989492 |
| 2543669 | 2543669P000FL Sa   | CRF01 AE                      | FL  | 2012 | MG989498 |
| 2544477 | 2544477P000FL Sa   | CRF01 AE                      | FL  | 2012 | MG989509 |
| 2545382 | 2545382P000FL Sa   | CRF01 AE                      | FL  | 2012 | MG989518 |
| 2545864 | 2545864P000FL Sa   | CRF01 AE                      | FL  | 2012 | MG989523 |
| 2546897 | 2546897P000FL Sa   | CRF01 AE                      | FL  | 2012 | MG989531 |
| 2547466 | 2547466P000L Sb    | CRF01 AE                      | LH  | 2012 | MG989653 |
| 2547466 | 2547466P000R Sa    | CRF01 AE                      | RH  | 2012 | MG989603 |
| 2549649 | 2549649P000L Sa    | CRF01 AE                      | LH  | 2012 | MG989666 |
| 2549649 | 2549649P000R Sc    | CRF01 AE                      | RH  | 2012 | MG989619 |
| 2543089 | 2543089P000FL Sj   | CRF01 AE/B Recombinant        | FL  | 2013 | MG989491 |
| 2543499 | 2543499P000FL Sc   | CRF01 AE/B Recombinant        | FL  | 2013 | MG989494 |
| 2543799 | 2543799P000FL Sa   | CRF01 AE                      | FL  | 2013 | MG989501 |
| 2544072 | 2544072P000FL Sd   | B                             | FL  | 2013 | MG989506 |
| 2544233 | 2544233P000FL Sa   | CRF01 AE                      | FL  | 2013 | MG989508 |

|         |                    |                             |     |      |          |
|---------|--------------------|-----------------------------|-----|------|----------|
| 2544320 | 2544320P000L Sa    | CRF01 AE/B Recombinant      | LH  | 2013 | MG989630 |
| 2544320 | 2544320P000R Sa    | CRF01 AE/B Recombinant      | RH  | 2013 | MG989580 |
| 2544829 | 2544829P000L Se    | B                           | LH  | 2013 | MG989633 |
| 2544829 | 2544829P000R Se    | B                           | RH  | 2013 | MG989583 |
| 2544878 | 2544878P000FL Sd   | CRF01 AE/B Recombinant      | FL  | 2013 | MG989513 |
| 2546054 | 2546054P000env S01 | CRF01 AE                    | ENV | 2013 | MG989668 |
| 2546345 | 2546345P000env S04 | CRF01 AE                    | ENV | 2013 | MG989669 |
| 2546579 | 2546579P000env S02 | CRF01 AE                    | ENV | 2013 | MG989670 |
| 2546859 | 2546859P000L Sa    | CRF01 AE (LH)               | LH  | 2013 | MG989649 |
| 2546952 | 2546952P000FL Sb   | CRF01 AE/B Recombinant      | FL  | 2013 | MG989533 |
| 2548448 | 2548448P000FL Sa   | CRF01 AE                    | FL  | 2013 | MG989552 |
| 2548569 | 2548569P000FL Sb   | CRF01 AE/B Recombinant      | FL  | 2013 | MG989555 |
| 2549325 | 2549325P000FL Sa   | CRF01 AE                    | FL  | 2013 | MG989563 |
| 2549340 | 2549340P000FL Sa   | CRF01 AE                    | FL  | 2013 | MG989564 |
| 2543075 | 2543075P000FL Sa   | CRF01 AE/B Recombinant      | FL  | 2014 | MG989490 |
| 2543236 | 2543236P000L Sa    | CRF01 AE                    | LH  | 2014 | MG989622 |
| 2543236 | 2543236P000R Sb    | CRF01 AE                    | RH  | 2014 | MG989572 |
| 2543500 | 2543500P000L Sa    | CRF01 AE                    | LH  | 2014 | MG989624 |
| 2543500 | 2543500P000R Sa    | CRF01 AE                    | RH  | 2014 | MG989574 |
| 2543655 | 2543655P000L Sd    | CRF01 AE (LH)               | LH  | 2014 | MG989625 |
| 2543707 | 2543707P000R Sb    | CRF01 AE/B Recombinant (RH) | RH  | 2014 | MG989576 |
| 2543896 | 2543896P000FL Sa   | CRF01 AE                    | FL  | 2014 | MG989503 |
| 2544584 | 2544584P000FL Sa   | CRF01 AE                    | FL  | 2014 | MG989511 |
| 2544980 | 2544980P000L Sa    | CRF01 AE/B Recombinant      | LH  | 2014 | MG989635 |
| 2544980 | 2544980P000R Sj    | CRF01 AE/B Recombinant      | RH  | 2014 | MG989585 |
| 2545040 | 2545040P000FL Sc   | CRF01 AE                    | FL  | 2014 | MG989514 |
| 2545383 | 2545383P000FL Sb   | CRF01 AE                    | FL  | 2014 | MG989519 |
| 2545430 | 2545430P000FL Sc   | CRF01 AE/B Recombinant      | FL  | 2014 | MG989520 |
| 2545848 | 2545848P000FL Sa   | CRF01 AE/B Recombinant      | FL  | 2014 | MG989522 |
| 2546031 | 2546031P000FL Sc   | CRF01 AE                    | FL  | 2014 | MG989524 |
| 2546138 | 2546138P000L Sb    | CRF01 AE                    | LH  | 2014 | MG989643 |
| 2546138 | 2546138P000R Sa    | CRF01 AE                    | RH  | 2014 | MG989594 |
| 2546278 | 2546278P000L Sa    | CRF01 AE/B Recombinant      | LH  | 2014 | MG989644 |
| 2546278 | 2546278P000R Sc    | CRF01 AE/B Recombinant      | RH  | 2014 | MG989595 |
| 2546323 | 2546323P000FL Sd   | CRF01 AE/B Recombinant      | FL  | 2014 | MG989526 |
| 2546587 | 2546587P000FL Sc   | CRF01 AE                    | FL  | 2014 | MG989529 |
| 2546901 | 2546901P000FL Se   | CRF01 AE                    | FL  | 2014 | MG989532 |
| 2547241 | 2547241P000FL Sa   | CRF01 AE                    | FL  | 2014 | MG989535 |
| 2547279 | 2547279P000FL Sk   | CRF01 AE                    | FL  | 2014 | MG989538 |
| 2547610 | 2547610P000FL Sj   | CRF01 AE/B Recombinant      | FL  | 2014 | MG989540 |
| 2547801 | 2547801P000L Sa    | CRF01 AE/B Recombinant      | LH  | 2014 | MG989655 |
| 2547801 | 2547801P000R Sa    | CRF01 AE/B Recombinant      | RH  | 2014 | MG989605 |
| 2548373 | 2548373P000L Sl    | CRF01 AE                    | LH  | 2014 | MG989548 |
| 2548725 | 2548725P000FL Sb   | CRF01 AE/B Recombinant      | FL  | 2014 | MG989556 |
| 2548758 | 2548758P000FL Sa   | CRF01 AE/B Recombinant      | FL  | 2014 | MG989557 |
| 2549013 | 2549013P000FL Sd   | CRF01 AE/B Recombinant      | FL  | 2014 | MG989560 |
| 2549090 | 2549090P000R Sg    | CRF01 AE (RH)               | RH  | 2014 | MG989614 |
| 2549585 | 2549585P000L Sd    | CRF01 AE/B Recombinant      | LH  | 2014 | MG989665 |
| 2549585 | 2549585P000R Sd    | CRF01 AE/B Recombinant      | RH  | 2014 | MG989618 |
| 2549734 | 2549734P000FL Si   | C                           | FL  | 2014 | MG989567 |
| 2543111 | 2543111P000L Sa    | CRF01 AE                    | LH  | 2015 | MG989621 |
| 2543111 | 2543111P000R Sb    | CRF01 AE                    | RH  | 2015 | MG989571 |
| 2543327 | 2543327P000L Sa    | CRF01 AE/B Recombinant      | LH  | 2015 | MG989623 |
| 2543327 | 2543327P000R Sa    | CRF01 AE/B Recombinant      | RH  | 2015 | MG989573 |
| 2543544 | 2543544P000FL Si   | CRF01 AE                    | FL  | 2015 | MG989496 |
| 2544032 | 2544032P000FL Sa   | CRF01 AE/B Recombinant      | FL  | 2015 | MG989505 |
| 2544154 | 2544154P000FL Sa   | CRF01 AE                    | FL  | 2015 | MG989507 |
| 2544636 | 2544636P000FL Sd   | CRF01 AE/B Recombinant      | FL  | 2015 | MG989512 |
| 2545278 | 2545278P000R Sd    | CRF01 AE (RH)               | RH  | 2015 | MG989588 |
| 2545377 | 2545377P000L Sc    | CRF01 AE                    | LH  | 2015 | MG989638 |
| 2545377 | 2545377P000R Sa    | CRF01 AE                    | RH  | 2015 | MG989589 |
| 2546440 | 2546440P000L Sb    | CRF01 AE/B Recombinant      | LH  | 2015 | MG989648 |
| 2546440 | 2546440P000R Se    | CRF01 AE/B Recombinant      | RH  | 2015 | MG989599 |
| 2546574 | 2546574P000FL Sk   | CRF01 AE                    | FL  | 2015 | MG989528 |
| 2547188 | 2547188P000FL Sk   | CRF01 AE                    | FL  | 2015 | MG989534 |
| 2547268 | 2547268P000FL Sa   | CRF01 AE                    | FL  | 2015 | MG989537 |



|         |                  |                             |    |      |          |
|---------|------------------|-----------------------------|----|------|----------|
| 2547424 | 2547424P000FL Sj | CRF01 AE                    | FL | 2015 | MG989539 |
| 2547627 | 2547627P000FL Sa | B                           | FL | 2015 | MG989541 |
| 2548105 | 2548105P000FL Sf | CRF01 AE                    | FL | 2015 | MG989543 |
| 2548182 | 2548182P000FL Sd | CRF01 AE/B Recombinant      | FL | 2015 | MG989545 |
| 2548247 | 2548247P000FL Sb | CRF01 AE                    | FL | 2015 | MG989546 |
| 2548344 | 2548344P000FL Sb | CRF01 AE/B Recombinant      | FL | 2015 | MG989547 |
| 2548411 | 2548411P000L Sb  | B                           | LH | 2015 | MG989660 |
| 2548411 | 2548411P000R Sa  | B                           | RH | 2015 | MG989610 |
| 2548419 | 2548419P000FL Sh | B                           | FL | 2015 | MG989551 |
| 2548453 | 2548453P000FL Sa | CRF01 AE                    | FL | 2015 | MG989553 |
| 2548522 | 2548522P000FL Se | CRF01 AE                    | FL | 2015 | MG989554 |
| 2548532 | 2548532P000L Sa  | CRF01 AE/B Recombinant      | LH | 2015 | MG989661 |
| 2548532 | 2548532P000R Se  | CRF01 AE/B Recombinant      | RH | 2015 | MG989612 |
| 2548609 | 2548609P000R Se  | CRF01 AE (RH)               | RH | 2015 | MG989613 |
| 2548820 | 2548820P000FL Sg | CRF01 AE                    | FL | 2015 | MG989558 |
| 2549547 | 2549547P000R Sg  | CRF01 AE/B Recombinant (RH) | RH | 2015 | MG989616 |
| 2549813 | 2549813P000FL Sf | CRF01 AE                    | FL | 2015 | MG989568 |

c) Details of subtype reference sequences (full genome)

| Subtype Reference | Sequence Name      | Sampling Country | Sampling Year | GenBank Accession |
|-------------------|--------------------|------------------|---------------|-------------------|
| A1                | 92RW008            | RW               | 1992          | AB253421          |
| A1                | 92UG037 A35        | UG               | 1992          | AB253428          |
| A2                | 97CDKTB48          | CD               | 1997          | AF286238          |
| A2                | 94CY017 41         | CY               | 1994          | AF286237          |
| B                 | RL42               | CN               | -             | U71182            |
| B                 | HXB2-LAI-IIIB-BRU  | FR               | 1983          | K03455            |
| B                 | BK132              | TH               | 1990          | AY173951          |
| B                 | M041               | TH               | 1996          | DQ354114          |
| B                 | M081               | TH               | 1996          | DQ354116          |
| B                 | US1                | US               | 1990          | AY173952          |
| C                 | BR025-d            | BR               | 1992          | U52953            |
| C                 | ETH2220            | ET               | 1986          | U46016            |
| C                 | 95IN21068          | IN               | 1995          | AF067155          |
| C                 | 04ZASK146          | ZA               | 2004          | AY772699          |
| C                 | 503 11204 34       | ZA               | 2007          | KT183264          |
| C                 | 503 06877 19       | ZA               | 2008          | KT183178          |
| D                 | ELI                | CD               | 1983          | K03454            |
| D                 | 94UG114            | UG               | 1994          | U88824            |
| F1                | VI850              | BE               | 1993          | AF077336          |
| F1                | 93BR020 1          | BR               | 1993          | AF005494          |
| F2                | 95CM-MP255         | CM               | 1995          | AJ249236          |
| F2                | CM53657            | CM               | 1997          | AF377956          |
| G                 | HH8793             | KE               | 1993          | AB485662          |
| G                 | 92NG083 JV10832    | NG               | 1992          | U88826            |
| H                 | VI991              | BE               | 1993          | AF190127          |
| H                 | 00GBAC4001         | GB               | 2000          | FJ711703          |
| J                 | 04CMU11421         | CM               | 2004          | GU237072          |
| J                 | SE9280 7887        | SE               | 1993          | AF082394          |
| K                 | 97ZR-EQTB11        | CD               | 1997          | AJ249235          |
| K                 | 96CM-MP535         | CM               | 1996          | AJ249239          |
| 01 AE             | 97CNGX2F 97CNGX 2F | CN               | 1997          | AY008714          |
| 01 AE             | 05GX001            | CN               | 2005          | GU564221          |
| 01 AE             | CM240              | TH               | 1990          | U54771            |
| 01 AE             | 93TH253            | TH               | 1993          | U51189            |
| 02 AG             | pBD6 15            | CM               | 1999          | AY271690          |
| 02 AG             | IBNG               | NG               | -             | L39106            |
| 07 BC             | 98CN009            | CN               | 1998          | AF286230          |
| 08 BC             | 97CNGX 6F          | CN               | 1997          | AY008715          |
| 15 01B            | 99TH MU2079        | TH               | 1999          | AF516184          |
| 33 01B            | 05MYKL007 1        | MY               | 2005          | DQ366659          |
| 34 01B            | OUR2275P           | TH               | 1999          | EF165540          |
| 48 01B            | 07MYKT014          | MY               | 2007          | GQ175881          |
| 51 01B            | 11SG HM021         | SG               | 2011          | JN029801          |
| 52 01B            | M043               | TH               | 1996          | DQ354113          |

|        |               |    |      |          |
|--------|---------------|----|------|----------|
| 53_01B | 11FIR164      | MY | 2011 | JX390610 |
| 54_01B | 09MYSB023     | MY | 2009 | JX390976 |
| 55_01B | HNCS102056    | CN | 2010 | JX574661 |
| 58_01B | 09MYPR37      | MY | 2009 | KC522031 |
| 59_01B | 09LNA423      | CN | 2009 | JX960635 |
| 67_01B | ANHUI_MAS59   | CN | 2011 | KC183780 |
| 68_01B | ANHUI_XC46    | CN | 2011 | KC183783 |
| 69_01B | 10JP-5091N200 | JP | 2010 | AB845349 |
| 74_01B | 10MYPR268     | MY | 2010 | KR019771 |
| 76_01B | N628          | JP | 2012 | †        |
| 78_cpx | YNTC19        | CN | 2013 | KU161143 |

†CRF76\_01B reference sequence archived in the DNA Data Bank of Japan (DDBJ) under accession number SAMD00041168-71.

d) Details of subtype B, B', and J reference sequences (*env* gp160)

| Subtype Reference | Sequence Name      | Sampling Country | Sampling Year | GenBank Accession |
|-------------------|--------------------|------------------|---------------|-------------------|
| B                 | 8634991            | AU               | -             | AY857144          |
| B                 | 03BR1046           | BR               | 2003          | JN692447          |
| B                 | 10BR_MG031_2       | BR               | 2010          | KT427841          |
| B                 | 10BR_RJ032         | BR               | 2010          | KJ849801          |
| B                 | 10BR_SP052         | BR               | 2010          | KT427802          |
| B                 | 502_1191_03        | CA               | 2007          | JF320424          |
| B                 | ZEnv91_0505_12     | CH               | -             | KU600815          |
| B                 | R9ZPHI39SGA_1_R9   | CH               | 2003          | KX792557          |
| B                 | 14CU005            | CU               | 2014          | KR914676          |
| B                 | CY067              | CY               | 2005          | FJ388911          |
| B                 | CY120              | CY               | 2005          | FJ388931          |
| B                 | 255524             | DE               | 2008          | KT124757          |
| B                 | 822582             | DE               | 2008          | KT124794          |
| B                 | 366396             | DE               | 2013          | KT124767          |
| B                 | X2886_2            | ES               | -             | JX422209          |
| B                 | ARP1195            | ES               | 2014          | KT276255          |
| B                 | DEMB11FR001        | FR               | 2011          | KF716496          |
| B                 | 820DEN35           | GB               | 1995          | AJ535608          |
| B                 | R232_F6            | GB               | 2008          | HQ595795          |
| B                 | 05HT_129389        | HT               | 2005          | EU839602          |
| B                 | 60                 | JP               | 1989          | AB588232          |
| B                 | DR2508             | JP               | 2000          | AB289587          |
| B                 | DR7065             | JP               | 2005          | AB287368          |
| B                 | KR5086_C1          | KR               | 1995          | AJ417429          |
| B                 | 05CSR3             | KR               | 2005          | DQ837381          |
| B                 | HP-18_07JHS10-3909 | KR               | 2007          | KJ140263          |
| B                 | 671_00T36          | NL               | 2000          | AY423387          |
| B                 | BK132              | TH               | 1990          | AY173951          |
| B                 | 05TH357801         | TH               | 2005          | JN248346          |
| B                 | AA011a09R          | TH               | 2006          | JX446817          |
| B                 | AA115c05R          | TH               | 2008          | JX448101          |
| B                 | 40353v04_01R       | TH               | 2010          | KU230423          |
| B                 | 00TT_CRC50018      | TT               | 2000          | EU839607          |
| B                 | HP038C             | US               | -             | KP754470          |
| B                 | N4549TOB8U         | US               | -             | GU728337          |
| B                 | R9577TOB8U         | US               | -             | GU728323          |
| B                 | S1532TOB8U         | US               | -             | GU728234          |
| B                 | W4541TOB8U         | US               | -             | GU728334          |
| B                 | H3                 | US               | 1982          | EF159971          |
| B                 | WR27               | US               | 1988          | AF286365          |
| B                 | M1003_x_D6         | US               | 1994          | KT283729          |
| B                 | 1058_11            | US               | 1998          | AY331295          |
| B                 | 848017             | US               | 2002          | KT124795          |
| B                 | P1189_107_15_1B    | US               | 2003          | KT283923          |
| B                 | 1599_A1            | US               | 2005          | HQ216785          |
| B                 | 306227_ENV         | US               | 2006          | JX863987          |
| B                 | Z95_p1             | US               | 2006          | HQ218034          |
| B                 | 502_0938_RH09      | US               | 2007          | JF320630          |
| B                 | 502_1518_RH10      | US               | 2007          | JF320099          |

|    |                       |    |      |          |
|----|-----------------------|----|------|----------|
| B  | 502 1897 wg2          | US | 2007 | JF320179 |
| B  | HIV US BID-V3046 2008 | US | 2008 | JQ403067 |
| B  | 9063 102910 CSF 1     | US | 2010 | KM354862 |
| B  | F6817 2C7             | US | 2011 | KU901757 |
| B  | 2454                  | US | 2014 | KX505435 |
| B  | 3693                  | US | 2015 | KX505552 |
| B  | 2609                  | US | 2016 | KX505536 |
| B' | RL42                  | CN | -    | U71182   |
| B' | YN9838                | CN | 1998 | JF932496 |
| B' | plwj                  | CN | 1999 | GU177863 |
| B' | CNHN24                | CN | 2001 | AY180905 |
| B' | 02HNsc11              | CN | 2002 | DQ007903 |
| B' | 02HNsq4               | CN | 2002 | DQ007902 |
| B' | CNE1                  | CN | 2006 | HQ699949 |
| B' | CNE4                  | CN | 2006 | HM215413 |
| B' | CNE6                  | CN | 2006 | HM215423 |
| B' | 09YNRL215042sg        | CN | 2009 | KC899011 |
| B' | YN09P0014             | CN | 2009 | JF932494 |
| B' | C600 pl               | GB | 2009 | JF680909 |
| B' | JRC65B                | JP | -    | AB565501 |
| B' | mSTD101               | MM | 1999 | AB097870 |
| B' | 3156F6_A8             | TH | -    | KJ953339 |
| B' | 93TH067               | TH | 1993 | U39258   |
| B' | 96TH NP1538           | TH | 1996 | AY713408 |
| B' | M041                  | TH | 1996 | DQ354114 |
| B' | M081                  | TH | 1996 | DQ354116 |
| B' | M145                  | TH | 1996 | DQ354118 |
| B' | 99TH C1416            | TH | 1999 | AY945711 |
| B' | 00TH C3198            | TH | 2000 | AY945710 |
| B' | 3045A06 A2            | TH | 2000 | KJ952535 |
| B' | 04TH601066            | TH | 2004 | JN248329 |
| B' | 04TH808998            | TH | 2004 | JN248335 |
| B' | 05TH440248            | TH | 2005 | JN248348 |
| B' | AA093a RH1            | TH | 2006 | JX447795 |
| B' | NPBQC                 | TH | 2006 | KJ769147 |
| B' | AA040a WG11           | TH | 2007 | JX447156 |
| J  | 93AOHDC253            | AO | 1993 | KU310620 |
| J  | J 97DC KTB147         | CD | 1997 | EF614151 |
| J  | CG-0331-02V NGSID13   | CD | 2002 | KY392776 |
| J  | LA26DiAn              | CD | 2003 | KU168280 |
| J  | 04CMU11421            | CM | 2004 | GU237072 |
| J  | SE9280 7887           | SE | 1993 | AF082394 |
| J  | SE9173 7022           | SE | 1994 | AF082395 |

**Table S2. Details of Asia *env* gp160 sequences downloaded from the Los Alamos National Laboratory (LANL) HIV Database and included in the present analysis**

| Subtype | Sampling Country | Sampling Year | Name               | Risk Factor | GenBank Accession |
|---------|------------------|---------------|--------------------|-------------|-------------------|
| 0107    | CN               | 2007          | 07JSNJ001          | PWID        | FJ238521          |
| 0107    | CN               | 2007          | MSM0720            | MSM         | KC833436          |
| 0107    | CN               | 2007          | JL070032           | SG          | KC990127          |
| 0107    | CN               | 2010          | JL.RF03            | SH          | KJ184176          |
| 0107    | CN               | 2010          | 10LNA015           | SH          | KU051564          |
| 0107    | CN               | 2011          | JL.RF09            | SH          | KJ184180          |
| 0107    | CN               | 2012          | kang124-NFL        | MSM         | KJ778897          |
| 0107    | CN               | 2013          | BJMP3002           | MSM         | KM974719          |
| 0107    | CN               | 2013          | BJMP3026           | MSM         | KM974720          |
| 0107    | CN               | 2014          | XC2014EU09         | MSM         | KT592380          |
| 0107    | CN               | 2014          | GXDY460B           | SH          | KT619126          |
| 0107    | CN               | 2015          | zj032              | N/A         | KX159285          |
| 0107    | CN               | 2015          | SX15DT013          | N/A         | KY216146          |
| 0107    | CN               | 2015          | SX15JC06           | N/A         | KY216147          |
| 0107    | CN               | 2015          | SX15JC12           | N/A         | KY216148          |
| 0107    | TW               | 2008          | TN_H8              | PWID        | KT372798          |
| 0108    | CN               | 2012          | GXDY_1299_NLFG     | SU          | KF541292          |
| 0108    | CN               | 2014          | 12YN10551          | SH          | KU356857          |
| 0708    | CN               | 2000          | HH069              | PWID        | AP005206          |
| 0708    | CN               | 2000          | HH086              | PWID        | AP005207          |
| 0708    | CN               | 2008          | 09YN072            | N/A         | HQ225812          |
| 01_AE   | CN               | 1997          | 97CNGX2F_97CNGX_2F | PWID        | AY008714          |
| 01_AE   | CN               | 1997          | 97CNGX_11F         | PWID        | AY008718          |
| 01_AE   | CN               | 1999          | AE01               | NO          | EU363849          |
| 01_AE   | CN               | 2002          | YN0203             | SH          | JX112860          |
| 01_AE   | CN               | 2002          | YN0221             | PWID        | JX112861          |
| 01_AE   | CN               | 2002          | YN0225             | SH          | JX112862          |
| 01_AE   | CN               | 2002          | YN0229             | PWID        | JX112863          |
| 01_AE   | CN               | 2002          | YN0232             | SH          | JX112864          |
| 01_AE   | CN               | 2002          | YN0235             | SH          | JX112865          |
| 01_AE   | CN               | 2002          | YN0236             | SH          | JX112866          |
| 01_AE   | CN               | 2005          | FJ051              | SH          | DQ859178          |
| 01_AE   | CN               | 2005          | FJ053              | SH          | DQ859179          |
| 01_AE   | CN               | 2005          | Fj055              | SH          | EF036527          |
| 01_AE   | CN               | 2005          | Fj052              | PWID        | EF036528          |
| 01_AE   | CN               | 2005          | Fj056              | SH          | EF036529          |
| 01_AE   | CN               | 2005          | Fj057              | SH          | EF036530          |
| 01_AE   | CN               | 2005          | Fj065              | SH          | EF036534          |
| 01_AE   | CN               | 2005          | Fj066              | SH          | EF036535          |
| 01_AE   | CN               | 2005          | AE03_SH188_6       | SU          | EU363851          |
| 01_AE   | CN               | 2005          | 05GX034            | SH          | GQ845124          |
| 01_AE   | CN               | 2005          | 05GX079            | SH          | GQ845125          |
| 01_AE   | CN               | 2005          | 05GX128            | SH          | GQ845126          |
| 01_AE   | CN               | 2005          | 05GX001            | SH          | GU564221          |
| 01_AE   | CN               | 2005          | 05GX002            | SH          | GU564222          |
| 01_AE   | CN               | 2005          | 05GX012            | SH          | GU564223          |
| 01_AE   | CN               | 2005          | 05GX013            | PWID        | GU564224          |
| 01_AE   | CN               | 2005          | 05GX014            | SH          | GU564225          |
| 01_AE   | CN               | 2005          | 05GX142            | SH          | GU564227          |
| 01_AE   | CN               | 2005          | 05GX156            | PWID        | GU564228          |
| 01_AE   | CN               | 2005          | 05GX162            | SH          | GU564229          |
| 01_AE   | CN               | 2005          | CNE62              | MSM         | HM215424          |
| 01_AE   | CN               | 2005          | CNE60              | N/A         | HQ699977          |
| 01_AE   | CN               | 2005          | CNE61_U            | N/A         | HQ699987          |
| 01_AE   | CN               | 2005          | GX2005002          | SH          | KP178420          |
| 01_AE   | CN               | 2006          | FJ054              | SH          | DQ859180          |
| 01_AE   | CN               | 2006          | Fj062              | SH          | EF036531          |
| 01_AE   | CN               | 2006          | Fj063              | SH          | EF036532          |
| 01_AE   | CN               | 2006          | Fj064              | SH          | EF036533          |
| 01_AE   | CN               | 2006          | Fj061              | SH          | EF036536          |
| 01_AE   | CN               | 2006          | AE02               | PWID        | EU363850          |
| 01_AE   | CN               | 2006          | HuB199_1           | N/A         | GU475025          |

|       |    |      |                 |      |          |
|-------|----|------|-----------------|------|----------|
| 01 AE | CN | 2006 | YN192 31        | N/A  | GU475046 |
| 01 AE | CN | 2006 | 06GX239         | SH   | GU564230 |
| 01 AE | CN | 2006 | CNE3            | PWID | HM215410 |
| 01 AE | CN | 2006 | CNE5            | SH   | HM215415 |
| 01 AE | CN | 2006 | CNE59           | PWID | HM215422 |
| 01 AE | CN | 2006 | CNE8            | PWID | HM215427 |
| 01 AE | CN | 2006 | CNE91 U         | N/A  | HQ699993 |
| 01 AE | CN | 2006 | SC070062        | PWID | JX112857 |
| 01 AE | CN | 2006 | SC070064        | SH   | JX112858 |
| 01 AE | CN | 2007 | 07JSWX045       | PWID | FJ441290 |
| 01 AE | CN | 2007 | GX24 8          | N/A  | GU475015 |
| 01 AE | CN | 2007 | GX28 31         | N/A  | GU475017 |
| 01 AE | CN | 2007 | BJX4 6          | N/A  | GU475020 |
| 01 AE | CN | 2007 | GX34 21         | N/A  | GU475022 |
| 01 AE | CN | 2007 | BJ5 11          | N/A  | GU475024 |
| 01 AE | CN | 2007 | GX2010 36       | N/A  | GU475026 |
| 01 AE | CN | 2007 | BJ17A 6         | N/A  | GU475028 |
| 01 AE | CN | 2007 | GX25 29         | N/A  | GU475030 |
| 01 AE | CN | 2007 | GX142 2         | N/A  | GU475031 |
| 01 AE | CN | 2007 | GZ187 10        | N/A  | GU475036 |
| 01 AE | CN | 2007 | GX13 7          | N/A  | GU475037 |
| 01 AE | CN | 2007 | BJ3 4           | N/A  | GU475040 |
| 01 AE | CN | 2007 | GX11 13         | N/A  | GU475042 |
| 01 AE | CN | 2007 | GX155 55        | N/A  | GU475043 |
| 01 AE | CN | 2007 | GX54 6          | N/A  | GU475045 |
| 01 AE | CN | 2007 | BJOX005000 09 2 | MSM  | HM215367 |
| 01 AE | CN | 2007 | BJOX008000 04 3 | SH   | HM215371 |
| 01 AE | CN | 2007 | BJOX009000 02 4 | MSM  | HM215372 |
| 01 AE | CN | 2007 | BJOX010000 06 2 | MSM  | HM215373 |
| 01 AE | CN | 2007 | BJOX012000 04 1 | MSM  | HM215376 |
| 01 AE | CN | 2007 | BJOX015000 11 5 | MSM  | HM215377 |
| 01 AE | CN | 2007 | BJOX017000 07 1 | MSM  | HM215378 |
| 01 AE | CN | 2007 | BJOX018000 02 3 | MSM  | HM215379 |
| 01 AE | CN | 2007 | BJOX021000 03 3 | MSM  | HM215383 |
| 01 AE | CN | 2007 | BJOX023000 05 4 | MSM  | HM215385 |
| 01 AE | CN | 2007 | BJOX025000 01 1 | MSM  | HM215386 |
| 01 AE | CN | 2007 | BJOX028000 10 3 | MSM  | HM215389 |
| 01 AE | CN | 2007 | BJOX030000 02 5 | SH   | HM215393 |
| 01 AE | CN | 2007 | CNE28           | PWID | HM215409 |
| 01 AE | CN | 2007 | CNE55           | PWID | HM215418 |
| 01 AE | CN | 2007 | CNE56           | PWID | HM215419 |
| 01 AE | CN | 2007 | CNE26           | N/A  | HQ699955 |
| 01 AE | CN | 2007 | CNE27           | N/A  | HQ699956 |
| 01 AE | CN | 2007 | CNE107          | PWID | HQ699986 |
| 01 AE | CN | 2007 | CNE71 U         | N/A  | HQ699988 |
| 01 AE | CN | 2007 | FJ070010        | SH   | JX112809 |
| 01 AE | CN | 2007 | FJ070013        | SH   | JX112810 |
| 01 AE | CN | 2007 | FJ070017        | SH   | JX112811 |
| 01 AE | CN | 2007 | FJ070033        | N/A  | JX112813 |
| 01 AE | CN | 2007 | FJ070035        | SH   | JX112814 |
| 01 AE | CN | 2007 | FJ070037        | SH   | JX112815 |
| 01 AE | CN | 2007 | FJ070039        | SH   | JX112816 |
| 01 AE | CN | 2007 | FJ070040        | SH   | JX112817 |
| 01 AE | CN | 2007 | FJ070043        | SH   | JX112818 |
| 01 AE | CN | 2007 | GD070010        | SH   | JX112819 |
| 01 AE | CN | 2007 | GD070058        | SH   | JX112820 |
| 01 AE | CN | 2007 | GD070059        | SH   | JX112821 |
| 01 AE | CN | 2007 | GD070083        | SH   | JX112822 |
| 01 AE | CN | 2007 | GD070090        | PWID | JX112823 |
| 01 AE | CN | 2007 | GD070092        | PWID | JX112824 |
| 01 AE | CN | 2007 | GD070096        | PWID | JX112825 |
| 01 AE | CN | 2007 | GD070118        | PWID | JX112826 |
| 01 AE | CN | 2007 | GD070120        | N/A  | JX112827 |
| 01 AE | CN | 2007 | GD070176        | PWID | JX112828 |
| 01 AE | CN | 2007 | GX070003        | SH   | JX112829 |
| 01 AE | CN | 2007 | GX070005        | SH   | JX112830 |

|       |    |      |                 |      |          |
|-------|----|------|-----------------|------|----------|
| 01 AE | CN | 2007 | GX070006        | PWID | JX112831 |
| 01 AE | CN | 2007 | GX070043        | SH   | JX112832 |
| 01 AE | CN | 2007 | GX070044        | SH   | JX112833 |
| 01 AE | CN | 2007 | GX070076        | SH   | JX112834 |
| 01 AE | CN | 2007 | GX070143        | SH   | JX112835 |
| 01 AE | CN | 2007 | GX070145        | SH   | JX112836 |
| 01 AE | CN | 2007 | GX070149        | PWID | JX112837 |
| 01 AE | CN | 2007 | GX070154        | PWID | JX112838 |
| 01 AE | CN | 2007 | GX070167        | PWID | JX112839 |
| 01 AE | CN | 2007 | GZ070004        | PWID | JX112840 |
| 01 AE | CN | 2007 | GZ070015        | N/A  | JX112841 |
| 01 AE | CN | 2007 | GZ070016        | PWID | JX112842 |
| 01 AE | CN | 2007 | GZ070123        | SH   | JX112843 |
| 01 AE | CN | 2007 | GZ070126        | N/A  | JX112844 |
| 01 AE | CN | 2007 | GZ070127        | SH   | JX112845 |
| 01 AE | CN | 2007 | JS070901        | SH   | JX112850 |
| 01 AE | CN | 2007 | JS071001        | SH   | JX112851 |
| 01 AE | CN | 2007 | JS071004        | SH   | JX112852 |
| 01 AE | CN | 2007 | JS071101        | SH   | JX112853 |
| 01 AE | CN | 2007 | LN070008        | MSM  | JX112854 |
| 01 AE | CN | 2007 | LN070010        | MSM  | JX112855 |
| 01 AE | CN | 2007 | LN070013        | SH   | JX112856 |
| 01 AE | CN | 2007 | TJ070003        | MSM  | JX112859 |
| 01 AE | CN | 2007 | 07CNYN312       | MB   | KF835499 |
| 01 AE | CN | 2007 | 07CNYN315       | SU   | KF835502 |
| 01 AE | CN | 2007 | 07CNYN316       | SU   | KF835503 |
| 01 AE | CN | 2007 | 07CNYN317       | N/A  | KF835504 |
| 01 AE | CN | 2007 | 07CNYN318       | MB   | KF835505 |
| 01 AE | CN | 2007 | 07CNYN326       | SU   | KF835513 |
| 01 AE | CN | 2007 | 07CNYN327       | PWID | KF835514 |
| 01 AE | CN | 2007 | 07CNYN329       | N/A  | KF835516 |
| 01 AE | CN | 2007 | 07CNYN332       | SU   | KF835518 |
| 01 AE | CN | 2007 | 07CNYN333       | SU   | KF835519 |
| 01 AE | CN | 2007 | 07CNYN337       | MB   | KF835523 |
| 01 AE | CN | 2007 | 07CNYN342       | SU   | KF835527 |
| 01 AE | CN | 2007 | 07CNYN343       | N/A  | KF835528 |
| 01 AE | CN | 2007 | 07CNYN354       | SU   | KF835533 |
| 01 AE | CN | 2007 | 07CNYN357       | SU   | KF835536 |
| 01 AE | CN | 2007 | 07CNYN359       | SU   | KF835538 |
| 01 AE | CN | 2007 | 07CNYN364       | SU   | KF835542 |
| 01 AE | CN | 2007 | 07CNYN366       | SU   | KF835543 |
| 01 AE | CN | 2008 | GX91 2          | N/A  | GU475013 |
| 01 AE | CN | 2008 | GX81 43         | N/A  | GU475014 |
| 01 AE | CN | 2008 | GX71 18         | N/A  | GU475016 |
| 01 AE | CN | 2008 | GX88 47         | N/A  | GU475018 |
| 01 AE | CN | 2008 | GX90 1          | N/A  | GU475019 |
| 01 AE | CN | 2008 | GX74 20         | N/A  | GU475021 |
| 01 AE | CN | 2008 | GX35 33         | N/A  | GU475023 |
| 01 AE | CN | 2008 | GX83 47         | N/A  | GU475027 |
| 01 AE | CN | 2008 | BJ6 17          | N/A  | GU475029 |
| 01 AE | CN | 2008 | SH6 81          | N/A  | GU475032 |
| 01 AE | CN | 2008 | SHX335 24       | N/A  | GU475033 |
| 01 AE | CN | 2008 | SHX346 60       | N/A  | GU475034 |
| 01 AE | CN | 2008 | GX72 27         | N/A  | GU475035 |
| 01 AE | CN | 2008 | GX73 29         | N/A  | GU475038 |
| 01 AE | CN | 2008 | GX8C 31         | N/A  | GU475039 |
| 01 AE | CN | 2008 | GX68 5          | N/A  | GU475044 |
| 01 AE | CN | 2008 | BJOX031000 02 2 | MSM  | HM215394 |
| 01 AE | CN | 2008 | 08LNA003        | MSM  | JX960606 |
| 01 AE | CN | 2008 | 08LNA002        | MSM  | JX960612 |
| 01 AE | CN | 2008 | 08LNA004        | MSM  | JX960617 |
| 01 AE | CN | 2008 | BJOX033000.e01  | SH   | KM218302 |
| 01 AE | CN | 2009 | 1119            | MSM  | HQ215553 |
| 01 AE | CN | 2009 | 1109            | MSM  | HQ215555 |
| 01 AE | CN | 2009 | YN09P0011       | SH   | JX112867 |
| 01 AE | CN | 2009 | YN09P0015       | SH   | JX112868 |

|       |    |      |              |     |          |
|-------|----|------|--------------|-----|----------|
| 01 AE | CN | 2009 | ZK052        | N/A | JX112869 |
| 01 AE | CN | 2009 | ZK056        | N/A | JX112870 |
| 01 AE | CN | 2009 | 09LNA379     | MSM | JX960603 |
| 01 AE | CN | 2009 | 09LNA008     | MSM | JX960604 |
| 01 AE | CN | 2009 | 09LNA011     | MSM | JX960605 |
| 01 AE | CN | 2009 | 09LNA340     | MSM | JX960607 |
| 01 AE | CN | 2009 | 09LNA020     | MSM | JX960613 |
| 01 AE | CN | 2009 | 09LNA230     | MSM | JX960614 |
| 01 AE | CN | 2009 | 09LNA040     | MSM | JX960615 |
| 01 AE | CN | 2009 | 09LNA041     | MSM | JX960618 |
| 01 AE | CN | 2009 | 09LNA425     | MSM | JX960621 |
| 01 AE | CN | 2009 | 09LNA013     | MSM | JX960623 |
| 01 AE | CN | 2009 | 09LNA527     | MSM | JX960625 |
| 01 AE | CN | 2009 | 10LNA105     | MSM | JX960626 |
| 01 AE | CN | 2009 | 09LNA007     | MSM | JX960627 |
| 01 AE | CN | 2009 | 09LNA353     | MSM | JX960628 |
| 01 AE | CN | 2009 | 10LNA016     | MSM | JX960629 |
| 01 AE | CN | 2009 | 09LNA005     | MSM | JX960630 |
| 01 AE | CN | 2009 | 09LNA136     | MSM | JX960631 |
| 01 AE | CN | 2009 | 09LNA025     | MSM | JX960634 |
| 01 AE | CN | 2009 | 09LNA480     | MSM | JX960636 |
| 01 AE | CN | 2009 | 09LNA009     | MSM | JX960638 |
| 01 AE | CN | 2009 | 09LNA086     | MSM | JX960639 |
| 01 AE | CN | 2009 | DE00109CN005 | MSM | KP109504 |
| 01 AE | CN | 2009 | DE00109CN008 | MSM | KP109505 |
| 01 AE | CN | 2010 | CYM059       | MSM | JX112796 |
| 01 AE | CN | 2010 | CYM075       | MSM | JX112797 |
| 01 AE | CN | 2010 | CYM105       | MSM | JX112798 |
| 01 AE | CN | 2010 | CYM124       | MSM | JX112799 |
| 01 AE | CN | 2010 | CYM136       | MSM | JX112800 |
| 01 AE | CN | 2010 | CYM138       | MSM | JX112801 |
| 01 AE | CN | 2010 | CYM139       | MSM | JX112802 |
| 01 AE | CN | 2010 | CYM140       | MSM | JX112803 |
| 01 AE | CN | 2010 | CYM143       | MSM | JX112804 |
| 01 AE | CN | 2010 | CYM147       | MSM | JX112805 |
| 01 AE | CN | 2010 | CYM149       | MSM | JX112806 |
| 01 AE | CN | 2010 | CYM152       | MSM | JX112807 |
| 01 AE | CN | 2010 | CYM154       | MSM | JX112808 |
| 01 AE | CN | 2010 | JL100005     | SH  | JX112846 |
| 01 AE | CN | 2010 | JL100007     | MSM | JX112847 |
| 01 AE | CN | 2010 | JL100014     | SH  | JX112848 |
| 01 AE | CN | 2010 | JL100020     | MSM | JX112849 |
| 01 AE | CN | 2010 | 10LNA103     | MSM | JX960608 |
| 01 AE | CN | 2010 | 10LNA124     | MSM | JX960609 |
| 01 AE | CN | 2010 | 10LNA819     | MSM | JX960610 |
| 01 AE | CN | 2010 | 10LNA571     | MSM | JX960611 |
| 01 AE | CN | 2010 | 10LNA821     | MSM | JX960616 |
| 01 AE | CN | 2010 | 10LNA294     | MSM | JX960619 |
| 01 AE | CN | 2010 | 10LNA918     | MSM | JX960620 |
| 01 AE | CN | 2010 | 10LNA264     | MSM | JX960622 |
| 01 AE | CN | 2010 | 10LNA669     | MSM | JX960624 |
| 01 AE | CN | 2010 | 10LNA976     | MSM | JX960632 |
| 01 AE | CN | 2010 | 10LNA057     | MSM | JX960633 |
| 01 AE | CN | 2010 | 10LNA471     | MSM | JX960637 |
| 01 AE | CN | 2010 | YNFL03       | SH  | KC870029 |
| 01 AE | CN | 2010 | YNFL20       | SH  | KC870039 |
| 01 AE | CN | 2010 | YNFL23       | SG  | KC870041 |
| 01 AE | CN | 2010 | DE00110CN007 | MSM | KP109506 |
| 01 AE | CN | 2010 | DE00110CN009 | MSM | KP109507 |
| 01 AE | CN | 2011 | DE00111CN002 | MSM | KC596064 |
| 01 AE | CN | 2011 | DE00111CN003 | MSM | KC596065 |
| 01 AE | CN | 2012 | DE00112CN011 | MSM | KP109508 |
| 01 AE | CN | -    | GX E 14      | N/A | AY217545 |
| 01 AE | HK | 2004 | HK001        | N/A | DQ234790 |
| 01 AE | ID | 1993 | ID17         | N/A | AB485652 |
| 01 AE | JP | 1993 | 93JP NH1     | SH  | AB052995 |

|       |    |      |                            |      |          |
|-------|----|------|----------------------------|------|----------|
| 01_AE | JP | 1993 | NH25_93JPNH25T_93JP_NH2_5T | SH   | AB070352 |
| 01_AE | JP | 2011 | DE00111JP003               | N/A  | KF859741 |
| 01_AE | JP | -    | DR0492                     | N/A  | AB253423 |
| 01_AE | JP | -    | DR6824                     | N/A  | AB253426 |
| 01_AE | JP | -    | DR1741                     | N/A  | AB253635 |
| 01_AE | JP | -    | DR1873                     | N/A  | AB253647 |
| 01_AE | JP | -    | DR2594                     | N/A  | AB253659 |
| 01_AE | JP | -    | DR1236                     | N/A  | AB253692 |
| 01_AE | JP | -    | DR2192                     | N/A  | AB253703 |
| 01_AE | JP | -    | JRC77AE                    | N/A  | AB565503 |
| 01_AE | KH | -    | C1712                      | N/A  | DQ518410 |
| 01_AE | KH | -    | LEANG                      | N/A  | DQ518411 |
| 01_AE | MM | 1999 | mCSW105                    | SW   | AB097872 |
| 01_AE | MM | 2014 | fkSDU26                    | PWID | KU820849 |
| 01_AE | NP | 2011 | 11NP084                    | SH   | KJ541845 |
| 01_AE | SG | 2008 | HM086                      | N/A  | KY213716 |
| 01_AE | SG | 2008 | HM097                      | N/A  | KY213717 |
| 01_AE | SG | 2008 | HM073                      | N/A  | KY213719 |
| 01_AE | SG | 2008 | FREE019                    | N/A  | KY213720 |
| 01_AE | SG | 2008 | HM033                      | N/A  | KY213722 |
| 01_AE | SG | 2008 | HM051                      | N/A  | KY213723 |
| 01_AE | SG | 2008 | HM089                      | N/A  | KY213724 |
| 01_AE | SG | 2008 | HM043                      | N/A  | KY213725 |
| 01_AE | SG | 2008 | HM067                      | N/A  | KY213726 |
| 01_AE | SG | 2008 | HM040                      | N/A  | KY213727 |
| 01_AE | SG | 2008 | HM044                      | N/A  | KY213728 |
| 01_AE | SG | 2008 | HM018                      | N/A  | KY213730 |
| 01_AE | SG | 2008 | HM026                      | N/A  | KY213731 |
| 01_AE | SG | 2008 | HM108                      | N/A  | KY213732 |
| 01_AE | SG | 2008 | HM032                      | N/A  | KY213733 |
| 01_AE | SG | 2008 | HM019                      | N/A  | KY213735 |
| 01_AE | SG | 2008 | HM034                      | N/A  | KY213736 |
| 01_AE | SG | 2008 | HM045                      | N/A  | KY213737 |
| 01_AE | SG | 2008 | HM038                      | N/A  | KY213738 |
| 01_AE | SG | 2008 | HM069                      | N/A  | KY213739 |
| 01_AE | SG | 2009 | HM130                      | N/A  | KY213715 |
| 01_AE | SG | 2009 | HM123D                     | N/A  | KY213718 |
| 01_AE | SG | 2009 | HM153I                     | N/A  | KY213721 |
| 01_AE | SG | 2009 | HM132F                     | N/A  | KY213729 |
| 01_AE | SG | 2009 | HM149                      | N/A  | KY213734 |
| 01_AE | SG | 2009 | HM140                      | N/A  | KY213749 |
| 01_AE | TH | 1990 | CM235                      | SH   | AF259954 |
| 01_AE | TH | 1990 | 90TH_CM244                 | N/A  | AY713425 |
| 01_AE | TH | 1990 | 90TH_CM240                 | SH   | AY736838 |
| 01_AE | TH | 1990 | CM246_c1                   | SH   | JN944663 |
| 01_AE | TH | 1992 | 92TH001                    | SH   | AY494968 |
| 01_AE | TH | 1992 | TH023                      | SH   | KU562843 |
| 01_AE | TH | 1993 | 93TH051                    | N/A  | AB220944 |
| 01_AE | TH | 1993 | 93TH054                    | N/A  | AB220945 |
| 01_AE | TH | 1993 | 93TH060                    | N/A  | AB220946 |
| 01_AE | TH | 1993 | 93TH062                    | N/A  | AB220947 |
| 01_AE | TH | 1993 | 93TH065                    | PWID | AB220948 |
| 01_AE | TH | 1993 | 93TH057                    | PWID | AB253424 |
| 01_AE | TH | 1993 | 93TH9021                   | N/A  | AF164485 |
| 01_AE | TH | 1993 | C2_CMU02                   | SH   | AY494967 |
| 01_AE | TH | 1993 | KH03                       | N/A  | U48264   |
| 01_AE | TH | 1993 | KH08                       | N/A  | U48266   |
| 01_AE | TH | 1993 | 93TH253                    | SH   | U51189   |
| 01_AE | TH | 1994 | A01021_A8_1                | SW   | AF015916 |
| 01_AE | TH | 1994 | E11429_A3_1                | N/A  | AF015919 |
| 01_AE | TH | 1994 | VII249                     | N/A  | DL258716 |
| 01_AE | TH | 1995 | 95TNIH022                  | SH   | AB032740 |
| 01_AE | TH | 1995 | 95TNIH047                  | SH   | AB032741 |
| 01_AE | TH | 1995 | NII144                     | SH   | AF070703 |
| 01_AE | TH | 1995 | NII145                     | SH   | AF070704 |
| 01_AE | TH | 1995 | NII146                     | N/A  | AF070705 |



|       |    |      |             |      |          |
|-------|----|------|-------------|------|----------|
| 01 AE | TH | 1995 | NII149      | N/A  | AF070707 |
| 01 AE | TH | 1995 | NII150      | SU   | AF070708 |
| 01 AE | TH | 1995 | NII152      | SH   | AF070709 |
| 01 AE | TH | 1996 | NII154      | SH   | AF070710 |
| 01 AE | TH | 1996 | NII155      | SH   | AF070711 |
| 01 AE | TH | 1996 | NII157      | SU   | AF070713 |
| 01 AE | TH | 1996 | 96TH NI1046 | N/A  | AY713421 |
| 01 AE | TH | 1996 | 96TH M02138 | N/A  | AY713424 |
| 01 AE | TH | 1996 | M114        | SH   | DQ354117 |
| 01 AE | TH | 1996 | M066 07     | SH   | JN944664 |
| 01 AE | TH | 1997 | 97TH6 107   | N/A  | AY125894 |
| 01 AE | TH | 1997 | 97TH NP1695 | N/A  | AY713419 |
| 01 AE | TH | 1997 | 97TH NP1525 | N/A  | AY713420 |
| 01 AE | TH | 1998 | 98TH NP1251 | N/A  | AY713422 |
| 01 AE | TH | 1998 | 98TH R1166  | SH   | AY945728 |
| 01 AE | TH | 1999 | OUR199I     | PWID | AY358039 |
| 01 AE | TH | 1999 | OUR066I     | PWID | AY358043 |
| 01 AE | TH | 1999 | OUR098I     | PWID | AY358044 |
| 01 AE | TH | 1999 | OUR164I     | PWID | AY358045 |
| 01 AE | TH | 1999 | OUR202I     | PWID | AY358047 |
| 01 AE | TH | 1999 | OUR203I     | PWID | AY358048 |
| 01 AE | TH | 1999 | OUR258I     | PWID | AY358049 |
| 01 AE | TH | 1999 | OUR422I     | PWID | AY358051 |
| 01 AE | TH | 1999 | OUR008I     | N/A  | AY358065 |
| 01 AE | TH | 1999 | 99TH NI1052 | N/A  | AY713423 |
| 01 AE | TH | 1999 | 99TH C1080  | SH   | AY945712 |
| 01 AE | TH | 1999 | 99TH C2405  | N/A  | AY945718 |
| 01 AE | TH | 1999 | 99TH C4460  | N/A  | AY945726 |
| 01 AE | TH | 1999 | 99TH R1149  | N/A  | AY945727 |
| 01 AE | TH | 1999 | 99TH R3006  | N/A  | AY945731 |
| 01 AE | TH | 1999 | 99TH R3265  | SH   | AY945732 |
| 01 AE | TH | 1999 | 3022A02.A1  | N/A  | KJ952376 |
| 01 AE | TH | 1999 | 3025A02.A3  | N/A  | KJ952432 |
| 01 AE | TH | 1999 | 3067A08.A10 | N/A  | KJ952689 |
| 01 AE | TH | 1999 | 3078A02.E16 | N/A  | KJ952712 |
| 01 AE | TH | 1999 | 3084A16.A1  | N/A  | KJ952732 |
| 01 AE | TH | 1999 | 3125A12.D15 | N/A  | KJ952991 |
| 01 AE | TH | 1999 | 3151A16.A2  | N/A  | KJ953229 |
| 01 AE | TH | 1999 | 3162A10.A3  | N/A  | KJ953366 |
| 01 AE | TH | 1999 | 3184A08.B1  | N/A  | KJ953408 |
| 01 AE | TH | 1999 | 3186A14.A2  | N/A  | KJ953438 |
| 01 AE | TH | 1999 | 3193A14.C1  | N/A  | KJ953503 |
| 01 AE | TH | 1999 | 3210A08.D22 | N/A  | KJ953596 |
| 01 AE | TH | 1999 | 3212A10.B10 | N/A  | KJ953611 |
| 01 AE | TH | 2000 | OUR201I     | PWID | AY358046 |
| 01 AE | TH | 2000 | OUR595I     | PWID | AY358052 |
| 01 AE | TH | 2000 | OUR661I     | PWID | AY358057 |
| 01 AE | TH | 2000 | OUR724I     | PWID | AY358060 |
| 01 AE | TH | 2000 | OUR746I     | PWID | AY358061 |
| 01 AE | TH | 2000 | OUR810I     | PWID | AY358063 |
| 01 AE | TH | 2000 | OUR200I     | PWID | AY358066 |
| 01 AE | TH | 2000 | OUR721I     | PWID | AY358067 |
| 01 AE | TH | 2000 | 00TH C2101  | SH   | AY945716 |
| 01 AE | TH | 2000 | 00TH C2257  | N/A  | AY945717 |
| 01 AE | TH | 2000 | 00TH C3347  | SH   | AY945721 |
| 01 AE | TH | 2000 | 00TH C4118  | SH   | AY945722 |
| 01 AE | TH | 2000 | 00TH C4151  | N/A  | AY945724 |
| 01 AE | TH | 2000 | 00TH C4382  | N/A  | AY945725 |
| 01 AE | TH | 2000 | C1705       | N/A  | DQ789392 |
| 01 AE | TH | 2000 | 3002B01.A12 | N/A  | KJ952242 |
| 01 AE | TH | 2000 | 3019A06.C1  | N/A  | KJ952346 |
| 01 AE | TH | 2000 | 3043A03.B11 | N/A  | KJ952505 |
| 01 AE | TH | 2000 | 3046A02.A1  | N/A  | KJ952562 |
| 01 AE | TH | 2000 | 3063A10.B1  | N/A  | KJ952667 |
| 01 AE | TH | 2000 | 3090A02.C6  | N/A  | KJ952765 |
| 01 AE | TH | 2000 | 3104A06.C4  | N/A  | KJ952852 |

|       |    |      |               |      |          |
|-------|----|------|---------------|------|----------|
| 01 AE | TH | 2000 | 3111A02.A2    | N/A  | KJ952897 |
| 01 AE | TH | 2000 | 3112A02.A1    | N/A  | KJ952917 |
| 01 AE | TH | 2000 | 3118A16.A1    | N/A  | KJ952968 |
| 01 AE | TH | 2000 | 3131A12.C11   | N/A  | KJ953089 |
| 01 AE | TH | 2000 | 3135A10.A11   | N/A  | KJ953119 |
| 01 AE | TH | 2000 | 3153A14.A1    | N/A  | KJ953282 |
| 01 AE | TH | 2000 | 3189A08.A2    | N/A  | KJ953459 |
| 01 AE | TH | 2000 | 3203A14.A1    | N/A  | KJ953555 |
| 01 AE | TH | 2000 | 3218A16.A1    | N/A  | KJ953634 |
| 01 AE | TH | 2000 | 3219A08.D1    | N/A  | KJ953664 |
| 01 AE | TH | 2001 | OUR786I       | PWID | AY358036 |
| 01 AE | TH | 2001 | OUR674I       | PWID | AY358038 |
| 01 AE | TH | 2001 | OUR609I       | PWID | AY358040 |
| 01 AE | TH | 2001 | OUR642I       | PWID | AY358041 |
| 01 AE | TH | 2001 | OUR414I       | N/A  | AY358050 |
| 01 AE | TH | 2001 | OUR647I       | PWID | AY358056 |
| 01 AE | TH | 2001 | OUR702I       | PWID | AY358059 |
| 01 AE | TH | 2001 | OUR830I       | PWID | AY358064 |
| 01 AE | TH | 2001 | OUR788I       | PWID | AY358068 |
| 01 AE | TH | 2001 | 01TH C1436    | N/A  | AY945713 |
| 01 AE | TH | 2001 | 01TH C2570    | N/A  | AY945719 |
| 01 AE | TH | 2001 | 01TH C3256    | N/A  | AY945720 |
| 01 AE | TH | 2001 | 01TH R2184    | SH   | AY945730 |
| 01 AE | TH | 2002 | OUR737I       | PWID | AY358037 |
| 01 AE | TH | 2002 | OUR769I       | PWID | AY358062 |
| 01 AE | TH | 2003 | TH7229        | N/A  | KU168309 |
| 01 AE | TH | 2004 | BKD           | N/A  | DQ314731 |
| 01 AE | TH | 2004 | BKM           | N/A  | DQ314732 |
| 01 AE | TH | 2004 | T500617 sga02 | N/A  | HQ691003 |
| 01 AE | TH | 2004 | T502281 sga02 | N/A  | HQ691013 |
| 01 AE | TH | 2004 | T276248 sga01 | N/A  | JF297221 |
| 01 AE | TH | 2004 | 04TH107542    | N/A  | JN248318 |
| 01 AE | TH | 2004 | 04TH328531    | N/A  | JN248324 |
| 01 AE | TH | 2004 | 04TH427990    | N/A  | JN248327 |
| 01 AE | TH | 2004 | 04TH505841    | N/A  | JN248328 |
| 01 AE | TH | 2004 | 04TH613543    | N/A  | JN248330 |
| 01 AE | TH | 2004 | 04TH807015    | N/A  | JN248334 |
| 01 AE | TH | 2004 | 04TH817196    | N/A  | JN248336 |
| 01 AE | TH | 2004 | AA027a wgl    | N/A  | JX447018 |
| 01 AE | TH | 2004 | AA074a07R     | N/A  | JX447529 |
| 01 AE | TH | 2004 | AA075a WG10   | N/A  | JX447535 |
| 01 AE | TH | 2004 | T256254 01    | N/A  | KC748972 |
| 01 AE | TH | 2005 | T293735 sga06 | N/A  | HQ690964 |
| 01 AE | TH | 2005 | 05TH127331    | N/A  | JN248338 |
| 01 AE | TH | 2005 | 05TH130087    | N/A  | JN248339 |
| 01 AE | TH | 2005 | 05TH327568    | N/A  | JN248341 |
| 01 AE | TH | 2005 | 05TH342968    | N/A  | JN248342 |
| 01 AE | TH | 2005 | 05TH741452    | N/A  | JN248355 |
| 01 AE | TH | 2005 | 05TH841749    | N/A  | JN248356 |
| 01 AE | TH | 2005 | 356272 c02    | SH   | JN944654 |
| 01 AE | TH | 2005 | 620345 c10    | SH   | JN944656 |
| 01 AE | TH | 2005 | 703357 c02    | SH   | JN944658 |
| 01 AE | TH | 2005 | AA004a WG12   | N/A  | JX446710 |
| 01 AE | TH | 2005 | AA023a10R     | N/A  | JX446976 |
| 01 AE | TH | 2005 | AA029b01R     | N/A  | JX447043 |
| 01 AE | TH | 2005 | AA033a wgl    | N/A  | JX447077 |
| 01 AE | TH | 2005 | AA049a WG11   | N/A  | JX447266 |
| 01 AE | TH | 2005 | AA051a01R     | N/A  | JX447294 |
| 01 AE | TH | 2005 | AA062b07R     | N/A  | JX447395 |
| 01 AE | TH | 2005 | AA064a WG1    | N/A  | JX447412 |
| 01 AE | TH | 2005 | AA066a09R     | N/A  | JX447447 |
| 01 AE | TH | 2005 | AA077a RH10   | N/A  | JX447561 |
| 01 AE | TH | 2005 | AA078a11R     | N/A  | JX447579 |
| 01 AE | TH | 2005 | AA079a WG1    | N/A  | JX447589 |
| 01 AE | TH | 2005 | AA094b05R     | N/A  | JX447814 |
| 01 AE | TH | 2005 | AA097a01R     | N/A  | JX447853 |

|       |    |      |               |     |          |
|-------|----|------|---------------|-----|----------|
| 01 AE | TH | 2005 | AA101a RH1    | N/A | JX447921 |
| 01 AE | TH | 2005 | AA103a06R     | N/A | JX447958 |
| 01 AE | TH | 2005 | AA107a wgl    | N/A | JX448019 |
| 01 AE | TH | 2005 | AA122a02R     | N/A | JX448217 |
| 01 AE | TH | 2005 | AA125a12R     | N/A | JX448253 |
| 01 AE | TH | 2005 | AA126a06R     | N/A | JX448270 |
| 01 AE | TH | 2006 | 21PL2         | N/A | EU743757 |
| 01 AE | TH | 2006 | 22PL1         | N/A | EU743758 |
| 01 AE | TH | 2006 | 29CC1         | N/A | EU743759 |
| 01 AE | TH | 2006 | 41CC1         | N/A | EU743763 |
| 01 AE | TH | 2006 | 41PB3         | N/A | EU743764 |
| 01 AE | TH | 2006 | 45CC1         | N/A | EU743765 |
| 01 AE | TH | 2006 | 45PB1         | N/A | EU743766 |
| 01 AE | TH | 2006 | 47CC11        | N/A | EU743767 |
| 01 AE | TH | 2006 | 47PL1         | N/A | EU743768 |
| 01 AE | TH | 2006 | 50PB2         | N/A | EU743769 |
| 01 AE | TH | 2006 | 50PL1         | N/A | EU743770 |
| 01 AE | TH | 2006 | 52PB3         | N/A | EU743771 |
| 01 AE | TH | 2006 | 52PL4         | N/A | EU743772 |
| 01 AE | TH | 2006 | 52PL7         | N/A | EU743773 |
| 01 AE | TH | 2006 | 55PL1         | N/A | EU743774 |
| 01 AE | TH | 2006 | 60CC3         | N/A | EU743775 |
| 01 AE | TH | 2006 | 60PB2         | N/A | EU743776 |
| 01 AE | TH | 2006 | 60PL2         | N/A | EU743777 |
| 01 AE | TH | 2006 | 62PL1         | N/A | EU743778 |
| 01 AE | TH | 2006 | 65CC1         | N/A | EU743779 |
| 01 AE | TH | 2006 | 65CC4         | N/A | EU743780 |
| 01 AE | TH | 2006 | 65PL1         | N/A | EU743781 |
| 01 AE | TH | 2006 | 98CC2         | N/A | EU743782 |
| 01 AE | TH | 2006 | 98CC3         | N/A | EU743783 |
| 01 AE | TH | 2006 | 98PB2         | N/A | EU743784 |
| 01 AE | TH | 2006 | 99CC8         | N/A | EU743785 |
| 01 AE | TH | 2006 | 99PB2         | N/A | EU743786 |
| 01 AE | TH | 2006 | 99PL2         | N/A | EU743787 |
| 01 AE | TH | 2006 | 101PL1        | N/A | EU743788 |
| 01 AE | TH | 2006 | 102CC2        | N/A | EU743789 |
| 01 AE | TH | 2006 | 104PB4        | N/A | EU743790 |
| 01 AE | TH | 2006 | 105PB1        | N/A | EU743791 |
| 01 AE | TH | 2006 | 105PL2        | N/A | EU743792 |
| 01 AE | TH | 2006 | 105PL3        | N/A | EU743793 |
| 01 AE | TH | 2006 | 107CC2        | N/A | EU743794 |
| 01 AE | TH | 2006 | T614109 sga02 | N/A | HQ691082 |
| 01 AE | TH | 2006 | T501602 sga01 | N/A | JF297225 |
| 01 AE | TH | 2006 | 427299 c12    | SH  | JN944655 |
| 01 AE | TH | 2006 | 644039 c01b   | SH  | JN944657 |
| 01 AE | TH | 2006 | 816763 c02    | SH  | JN944659 |
| 01 AE | TH | 2006 | AA002a WG1    | N/A | JX446666 |
| 01 AE | TH | 2006 | AA003b05R     | N/A | JX446698 |
| 01 AE | TH | 2006 | AA006a02      | N/A | JX446736 |
| 01 AE | TH | 2006 | AA014a05      | N/A | JX446853 |
| 01 AE | TH | 2006 | AA017a wgl    | N/A | JX446899 |
| 01 AE | TH | 2006 | AA018a07R     | N/A | JX446910 |
| 01 AE | TH | 2006 | AA022a RH1    | N/A | JX446960 |
| 01 AE | TH | 2006 | AA034a wgl    | N/A | JX447087 |
| 01 AE | TH | 2006 | AA035a01R     | N/A | JX447102 |
| 01 AE | TH | 2006 | AA038a WG3    | N/A | JX447132 |
| 01 AE | TH | 2006 | AA042a12R     | N/A | JX447199 |
| 01 AE | TH | 2006 | AA044a RH1    | N/A | JX447220 |
| 01 AE | TH | 2006 | AA055a WG4    | N/A | JX447312 |
| 01 AE | TH | 2006 | AA056a WG2    | N/A | JX447315 |
| 01 AE | TH | 2006 | AA058a02R     | N/A | JX447344 |
| 01 AE | TH | 2006 | AA059a WG1    | N/A | JX447349 |
| 01 AE | TH | 2006 | AA063a RH1    | N/A | JX447402 |
| 01 AE | TH | 2006 | AA068a 14     | N/A | JX447465 |
| 01 AE | TH | 2006 | AA073a RH1    | N/A | JX447515 |
| 01 AE | TH | 2006 | AA076a03R     | N/A | JX447550 |

|       |    |      |               |     |          |
|-------|----|------|---------------|-----|----------|
| 01 AE | TH | 2006 | AA082a WG1    | N/A | JX447637 |
| 01 AE | TH | 2006 | AA083a08R     | N/A | JX447657 |
| 01 AE | TH | 2006 | AA085a wgl    | N/A | JX447678 |
| 01 AE | TH | 2006 | AA086a06R     | N/A | JX447699 |
| 01 AE | TH | 2006 | AA088a wgl1   | N/A | JX447709 |
| 01 AE | TH | 2006 | AA099a WG1    | N/A | JX447884 |
| 01 AE | TH | 2006 | AA100b07R     | N/A | JX447902 |
| 01 AE | TH | 2006 | AA104a RH1    | N/A | JX447978 |
| 01 AE | TH | 2006 | AA109a01R     | N/A | JX448039 |
| 01 AE | TH | 2006 | AA121a04R     | N/A | JX448198 |
| 01 AE | TH | 2006 | AA123a04R     | N/A | JX448238 |
| 01 AE | TH | 2006 | AA127a02R     | N/A | JX448279 |
| 01 AE | TH | 2006 | AA129a02R     | N/A | JX448289 |
| 01 AE | TH | 2006 | AA130a07R     | N/A | JX448301 |
| 01 AE | TH | 2007 | WN04          | N/A | GQ916569 |
| 01 AE | TH | 2007 | WN10          | N/A | GQ916571 |
| 01 AE | TH | 2007 | WN12          | N/A | GQ916572 |
| 01 AE | TH | 2007 | WN13          | N/A | GQ916573 |
| 01 AE | TH | 2007 | WN26          | N/A | GQ916574 |
| 01 AE | TH | 2007 | WN27          | N/A | GQ916575 |
| 01 AE | TH | 2007 | T357545 sga01 | N/A | HQ690973 |
| 01 AE | TH | 2007 | T502102 sga02 | N/A | HQ691004 |
| 01 AE | TH | 2007 | T503006 sga10 | N/A | HQ691020 |
| 01 AE | TH | 2007 | T509989 sga11 | N/A | HQ691039 |
| 01 AE | TH | 2007 | T518020 sga08 | N/A | HQ691052 |
| 01 AE | TH | 2007 | T535902 sga02 | N/A | HQ691073 |
| 01 AE | TH | 2007 | MERLBDTRC2    | N/A | JN860761 |
| 01 AE | TH | 2007 | MERLBDTRC4    | N/A | JN860763 |
| 01 AE | TH | 2007 | MERLBDTRC5    | N/A | JN860764 |
| 01 AE | TH | 2007 | MERLBDTRC7    | N/A | JN860766 |
| 01 AE | TH | 2007 | MERLBDTRC8    | N/A | JN860767 |
| 01 AE | TH | 2007 | AA005a07R     | N/A | JX446728 |
| 01 AE | TH | 2007 | AA008a RH1    | N/A | JX446775 |
| 01 AE | TH | 2007 | AA009b01R     | N/A | JX446790 |
| 01 AE | TH | 2007 | AA012a RH1    | N/A | JX446837 |
| 01 AE | TH | 2007 | AA015a RH5    | N/A | JX446873 |
| 01 AE | TH | 2007 | AA019a WG1    | N/A | JX446916 |
| 01 AE | TH | 2007 | AA021a08R     | N/A | JX446942 |
| 01 AE | TH | 2007 | AA024a10      | N/A | JX446987 |
| 01 AE | TH | 2007 | AA026a02R     | N/A | JX447013 |
| 01 AE | TH | 2007 | AA028a wg3    | N/A | JX447028 |
| 01 AE | TH | 2007 | AA030a08      | N/A | JX447054 |
| 01 AE | TH | 2007 | AA031a01      | N/A | JX447063 |
| 01 AE | TH | 2007 | AA036a01R     | N/A | JX447117 |
| 01 AE | TH | 2007 | AA041a01R     | N/A | JX447177 |
| 01 AE | TH | 2007 | AA048b08R     | N/A | JX447252 |
| 01 AE | TH | 2007 | AA050a WG7    | N/A | JX447283 |
| 01 AE | TH | 2007 | AA061a05R     | N/A | JX447379 |
| 01 AE | TH | 2007 | AA065a01R     | N/A | JX447427 |
| 01 AE | TH | 2007 | AA069a01R     | N/A | JX447480 |
| 01 AE | TH | 2007 | AA072a09      | N/A | JX447499 |
| 01 AE | TH | 2007 | AA080a09R     | N/A | JX447608 |
| 01 AE | TH | 2007 | AA089a05      | N/A | JX447721 |
| 01 AE | TH | 2007 | AA091a02R     | N/A | JX447746 |
| 01 AE | TH | 2007 | AA092b13R     | N/A | JX447773 |
| 01 AE | TH | 2007 | AA098a08R     | N/A | JX447875 |
| 01 AE | TH | 2007 | AA105a06R     | N/A | JX448001 |
| 01 AE | TH | 2008 | TR01          | N/A | GQ916576 |
| 01 AE | TH | 2008 | TR09          | N/A | GQ916577 |
| 01 AE | TH | 2008 | TR18          | N/A | GQ916578 |
| 01 AE | TH | 2008 | TR23          | N/A | GQ916579 |
| 01 AE | TH | 2008 | TR26          | N/A | GQ916580 |
| 01 AE | TH | 2008 | TR27          | N/A | GQ916581 |
| 01 AE | TH | 2008 | TR28          | N/A | GQ916582 |
| 01 AE | TH | 2008 | TR32          | N/A | GQ916583 |
| 01 AE | TH | 2008 | RY05          | N/A | GQ916584 |

|       |    |      |                    |     |          |
|-------|----|------|--------------------|-----|----------|
| 01 AE | TH | 2008 | RY09               | N/A | GQ916585 |
| 01 AE | TH | 2008 | RY12               | N/A | GQ916587 |
| 01 AE | TH | 2008 | RY17               | N/A | GQ916588 |
| 01 AE | TH | 2008 | RY18               | N/A | GQ916589 |
| 01 AE | TH | 2008 | RY25               | N/A | GQ916590 |
| 01 AE | TH | 2008 | RY27               | N/A | GQ916591 |
| 01 AE | TH | 2008 | RY31               | N/A | GQ916592 |
| 01 AE | TH | 2008 | RY37               | N/A | GQ916593 |
| 01 AE | TH | 2008 | T504258_sga07      | N/A | HQ691028 |
| 01 AE | TH | 2008 | AE Env CR2 Apr08D  | N/A | JN388081 |
| 01 AE | TH | 2008 | AE Env CR3 Apr08R  | N/A | JN388091 |
| 01 AE | TH | 2008 | AE Env CR10 Apr08D | N/A | JN388101 |
| 01 AE | TH | 2008 | AE Env CR14 Apr08R | N/A | JN388111 |
| 01 AE | TH | 2008 | AE Env CR15 Apr08R | N/A | JN388121 |
| 01 AE | TH | 2008 | AE Env CR8 Apr08R  | N/A | JN388131 |
| 01 AE | TH | 2008 | AE Env CR11 Apr08R | N/A | JN388141 |
| 01 AE | TH | 2008 | AE Env CR12 Apr08R | N/A | JN388151 |
| 01 AE | TH | 2008 | AE Env CR17 Apr08R | N/A | JN388161 |
| 01 AE | TH | 2008 | AE Env CR19 Apr08D | N/A | JN388171 |
| 01 AE | TH | 2008 | AE Env CR25 Apr08D | N/A | JN388181 |
| 01 AE | TH | 2008 | AE Env CR28 Apr08D | N/A | JN388191 |
| 01 AE | TH | 2008 | AE Env CR29 Apr08D | N/A | JN388201 |
| 01 AE | TH | 2008 | AE Env CR36 Apr08D | N/A | JN388211 |
| 01 AE | TH | 2008 | AE Env CR38 Apr08D | N/A | JN388221 |
| 01 AE | TH | 2008 | MERLBDTRC9         | N/A | JN860768 |
| 01 AE | TH | 2008 | AA001a07R          | N/A | JX446655 |
| 01 AE | TH | 2008 | AA007a WG1         | N/A | JX446755 |
| 01 AE | TH | 2008 | AA013a05           | N/A | JX446848 |
| 01 AE | TH | 2008 | AA016a14R          | N/A | JX446888 |
| 01 AE | TH | 2008 | AA032a01           | N/A | JX447072 |
| 01 AE | TH | 2008 | AA037A WG11        | N/A | JX447122 |
| 01 AE | TH | 2008 | AA052a01           | N/A | JX447300 |
| 01 AE | TH | 2008 | AA054a05           | N/A | JX447305 |
| 01 AE | TH | 2008 | AA057a02R          | N/A | JX447328 |
| 01 AE | TH | 2008 | AA060a WG1         | N/A | JX447359 |
| 01 AE | TH | 2008 | AA067A WG17        | N/A | JX447454 |
| 01 AE | TH | 2008 | AA070a RH01        | N/A | JX447493 |
| 01 AE | TH | 2008 | AA102a RH1         | N/A | JX447941 |
| 01 AE | TH | 2008 | AA108a WG6         | N/A | JX448028 |
| 01 AE | TH | 2008 | AA110a01R          | N/A | JX448051 |
| 01 AE | TH | 2008 | AA112a03R          | N/A | JX448071 |
| 01 AE | TH | 2008 | AA113a RH1         | N/A | JX448086 |
| 01 AE | TH | 2008 | AA131a01R          | N/A | JX448312 |
| 01 AE | TH | 2009 | R163b p1           | SG  | JF680932 |
| 01 AE | TH | 2009 | AA045a03R          | N/A | JX447235 |
| 01 AE | TH | 2009 | AA090a WG1         | N/A | JX447726 |
| 01 AE | TH | 2009 | AA111a WG1         | N/A | JX448057 |
| 01 AE | TH | 2009 | 254001P00Ra.c01    | SH  | JX512892 |
| 01 AE | TH | 2009 | 254003P00Ra.c01    | MSM | JX512893 |
| 01 AE | TH | 2009 | 254006P00Ra.c01    | MSM | JX512894 |
| 01 AE | TH | 2009 | 254007P00Ra.c01    | MSM | JX512895 |
| 01 AE | TH | 2009 | 254008P00Rd.c01    | MSM | JX512896 |
| 01 AE | TH | 2009 | 254010P00Ra.c01    | MSM | JX512898 |
| 01 AE | TH | 2009 | SN40032 01 vA      | SH  | JX512901 |
| 01 AE | TH | 2009 | RTA2-env           | N/A | KF268035 |
| 01 AE | TH | 2009 | RTA3-env           | N/A | KF268036 |
| 01 AE | TH | 2009 | RTA4-env           | N/A | KF268037 |
| 01 AE | TH | 2009 | RTA5-env           | N/A | KF268038 |
| 01 AE | TH | 2009 | RTA6-env           | N/A | KF268039 |
| 01 AE | TH | 2009 | RTA8-env           | N/A | KF268040 |
| 01 AE | TH | 2009 | RTA9-env           | N/A | KF268041 |
| 01 AE | TH | 2009 | RTA11-env          | N/A | KF268042 |
| 01 AE | TH | 2009 | RTA13-env          | N/A | KF268043 |
| 01 AE | TH | 2009 | RTA16-env          | N/A | KF268044 |
| 01 AE | TH | 2009 | RTA21-env          | N/A | KF268045 |
| 01 AE | TH | 2009 | RTA23-env          | N/A | KF268046 |

|       |    |      |              |     |          |
|-------|----|------|--------------|-----|----------|
| 01_AE | TH | 2009 | RTA24-env    | N/A | KF268047 |
| 01_AE | TH | 2009 | RTA27-env    | N/A | KF268048 |
| 01_AE | TH | 2009 | 254002C01Ra  | N/A | KT185744 |
| 01_AE | TH | 2009 | 254004C01Ra  | N/A | KT185983 |
| 01_AE | TH | 2009 | 40061v03_06  | N/A | KU230417 |
| 01_AE | TH | 2009 | 254001_P00Ra | N/A | KU230427 |
| 01_AE | TH | 2009 | 254006_P00Ra | N/A | KU230428 |
| 01_AE | TH | 2009 | 254007_P00Ra | N/A | KU230429 |
| 01_AE | TH | 2010 | DE00110TH001 | MSM | KP109513 |
| 01_AE | TH | 2010 | 254016C01Ra  | N/A | KT185678 |
| 01_AE | TH | 2010 | 254024C01Ra  | N/A | KT185724 |
| 01_AE | TH | 2010 | 254034C01Ra  | N/A | KT185793 |
| 01_AE | TH | 2010 | 254032C01Ra  | N/A | KT185921 |
| 01_AE | TH | 2010 | 254019C01Rb  | N/A | KT185941 |
| 01_AE | TH | 2010 | 254023C01Ra  | N/A | KT185962 |
| 01_AE | TH | 2010 | 254029C01Ra  | N/A | KT186005 |
| 01_AE | TH | 2010 | 40094v01_01R | N/A | KU230418 |
| 01_AE | TH | 2010 | 40100v01_06  | N/A | KU230419 |
| 01_AE | TH | 2010 | 40123v03_06R | N/A | KU230420 |
| 01_AE | TH | 2010 | 40250v03_02R | N/A | KU230422 |
| 01_AE | TH | 2010 | 254014_P00Rb | N/A | KU230430 |
| 01_AE | TH | 2010 | 254018_P00a  | N/A | KU230432 |
| 01_AE | TH | 2010 | 254020_P00Ra | N/A | KU230433 |
| 01_AE | TH | 2010 | 254021_P00c  | N/A | KU230434 |
| 01_AE | TH | 2010 | 254022_P00c  | N/A | KU230435 |
| 01_AE | TH | 2010 | 254026_P00Ra | N/A | KU230436 |
| 01_AE | TH | 2010 | 254027_P00Ra | N/A | KU230437 |
| 01_AE | TH | 2011 | 254036C01Ra  | N/A | KT185851 |
| 01_AE | TH | 2011 | 40231v02_02R | N/A | KU230421 |
| 01_AE | TH | 2011 | 40363v03_01  | N/A | KU230424 |
| 01_AE | TH | 2011 | 40436v02_01  | N/A | KU230426 |
| 01_AE | TH | -    | NP03         | N/A | AB485654 |
| 01_AE | TH | -    | KSS_0514_13  | N/A | HM215429 |
| 01_AE | TH | -    | PSR_0508_2   | N/A | HM215432 |
| 01_AE | TH | -    | SPK_0525_13  | N/A | HM215436 |
| 01_AE | TH | -    | 107747_048   | N/A | JX848346 |
| 01_AE | TH | -    | 113035_007   | N/A | JX848348 |
| 01_AE | TH | -    | 142902_011   | N/A | JX848350 |
| 01_AE | TH | -    | 3007F3.A3    | N/A | KJ952283 |
| 01_AE | TH | -    | 3017F5.A1    | N/A | KJ952314 |
| 01_AE | TH | -    | 3098F5.A4    | N/A | KJ952820 |
| 01_AE | TH | -    | 3126A02.B1   | N/A | KJ952992 |
| 01_AE | TH | -    | 3127F6.A1    | N/A | KJ953058 |
| 01_AE | TH | -    | 3139F5.A13   | N/A | KJ953149 |
| 01_AE | TH | -    | 3141A16.B2   | N/A | KJ953175 |
| 01_AE | TH | -    | 3155F6.A10   | N/A | KJ953316 |
| 01_AE | TH | -    | 3156F6.A10   | N/A | KJ953335 |
| 01_AE | TH | -    | 3202F6.B1    | N/A | KJ953525 |
| 01_AE | TH | -    | 3220F5.A3    | N/A | KJ953685 |
| 01_AE | VN | 1997 | 97VNHCM301   | N/A | FJ185237 |
| 01_AE | VN | 1997 | 97VNHCM302   | N/A | FJ185238 |
| 01_AE | VN | 1997 | 97VNHCM303   | N/A | FJ185239 |
| 01_AE | VN | 1997 | 97VNHCM310   | N/A | FJ185240 |
| 01_AE | VN | 1997 | 97VNHCM314   | N/A | FJ185241 |
| 01_AE | VN | 1997 | 97VNHCM319   | N/A | FJ185242 |
| 01_AE | VN | 1997 | 97VNHCM343   | N/A | FJ185243 |
| 01_AE | VN | 1997 | 97VNHCM345   | N/A | FJ185244 |
| 01_AE | VN | 1997 | 97VNAG201    | N/A | FJ185245 |
| 01_AE | VN | 1997 | 97VNAG202    | N/A | FJ185246 |
| 01_AE | VN | 1997 | 97VNAG204    | N/A | FJ185247 |
| 01_AE | VN | 1997 | 97VNAG206    | N/A | FJ185248 |
| 01_AE | VN | 1997 | 97VNAG207    | N/A | FJ185249 |
| 01_AE | VN | 1997 | 97VNAG208    | N/A | FJ185250 |
| 01_AE | VN | 1997 | 97VNAG210    | N/A | FJ185251 |
| 01_AE | VN | 1997 | 97VNAG212    | N/A | FJ185252 |
| 01_AE | VN | 1997 | 97VNAG214    | N/A | FJ185253 |

|       |    |      |                    |      |          |
|-------|----|------|--------------------|------|----------|
| 01_AE | VN | 1997 | 97VNAG216          | N/A  | FJ185254 |
| 01_AE | VN | 1997 | 97VNAG218          | N/A  | FJ185255 |
| 01_AE | VN | 1997 | 97VNAG220          | N/A  | FJ185256 |
| 01_AE | VN | 1997 | 97VNAG221          | N/A  | FJ185257 |
| 01_AE | VN | 1997 | 97VNAG223          | N/A  | FJ185258 |
| 01_AE | VN | 1997 | 97VNHCM306         | N/A  | FJ185259 |
| 01_AE | VN | 1997 | 97VNHCM309         | N/A  | FJ185260 |
| 01_AE | VN | 1998 | 98VNBG4            | N/A  | FJ185228 |
| 01_AE | VN | 1998 | 98VNBG5            | N/A  | FJ185229 |
| 01_AE | VN | 1998 | 98VNBG6            | N/A  | FJ185230 |
| 01_AE | VN | 1998 | 98VNBG7            | N/A  | FJ185231 |
| 01_AE | VN | 1998 | 98VNHD9            | N/A  | FJ185232 |
| 01_AE | VN | 1998 | 98VNHD10           | N/A  | FJ185233 |
| 01_AE | VN | 1998 | 98VNHD11           | N/A  | FJ185234 |
| 01_AE | VN | 1998 | 98VNND15           | N/A  | FJ185235 |
| 01_AE | VN | 1998 | 98VNND17           | N/A  | FJ185236 |
| 01B   | CN | 2006 | CNHLJSM06059       | N/A  | EU131799 |
| 01B   | CN | 2007 | 07CNYN370          | SU   | KF835546 |
| 01B   | CN | 2010 | JL.RF07            | SG   | KF859773 |
| 01B   | CN | 2011 | JS2011001          | SH   | KM111555 |
| 01B   | CN | 2013 | BJMP3037B          | MSM  | KP418805 |
| 01B   | CN | 2013 | BJMP3194B          | MSM  | KP418806 |
| 01B   | CN | 2013 | 01B.CN.2012.11092  | SH   | KU501256 |
| 01B   | CN | 2014 | 12YN10135          | SH   | KT999999 |
| 01B   | JP | 2003 | 03JP-5091K279      | MSM  | AB859012 |
| 01B   | JP | 2005 | 05JPMYC113SP420    | SH   | LC027100 |
| 01B   | JP | -    | pHIV_1_Y271B01AE54 | N/A  | AB646289 |
| 01B   | MM | 1999 | mCSW104            | SW   | AB097867 |
| 01B   | MM | 2000 | mIDU502            | PWID | AB097865 |
| 01B   | MM | 2013 | mSSDU187           | PWID | KU820835 |
| 01B   | MY | 2004 | 04MYKL019_1        | N/A  | DQ366665 |
| 01B   | MY | 2005 | 05MYKL043_1        | N/A  | DQ366666 |
| 01B   | MY | 2006 | 06MMYKLD46         | PWID | EF495062 |
| 01B   | MY | 2007 | 07MYKLD48          | N/A  | EU031914 |
| 01B   | MY | 2008 | 08MYKL056          | N/A  | KT438782 |
| 01B   | MY | 2010 | 10MYPR226          | PWID | KJ206289 |
| 01B   | MY | 2010 | 10MYKJ086          | PWID | KT438783 |
| 01B   | MY | 2010 | 10MYPR70           | PWID | KT438784 |
| 01B   | TH | 1991 | CM237              | SH   | AY167123 |
| 01B   | TH | 1996 | M005               | SH   | DQ354115 |
| 01B   | TH | 1996 | M171               | SH   | DQ354121 |
| 01B   | TH | 1999 | OUR044I            | PWID | AY358042 |
| 01B   | TH | 1999 | OUR2574            | PWID | DQ354123 |
| 01B   | TH | 2000 | 00TH_C2254_BE      | N/A  | AY945733 |
| 01B   | TH | 2001 | OUR033I            | PWID | AY358071 |
| 01B   | TH | 2002 | OUR847I            | PWID | AY358069 |
| 01B   | TH | 2002 | OUR840I            | PWID | AY358070 |
| 01B   | TH | 2002 | OUR846I            | PWID | AY358072 |
| 01B   | TH | 2002 | OUR740I            | PWID | AY358073 |
| 01B   | TH | 2003 | 03TH700065         | N/A  | JN248316 |
| 01B   | TH | 2003 | 03TH700078         | N/A  | JN248317 |
| 01B   | TH | 2004 | 04TH228466         | N/A  | JN248319 |
| 01B   | TH | 2004 | 04TH312908         | N/A  | JN248320 |
| 01B   | TH | 2004 | 04TH321566         | N/A  | JN248322 |
| 01B   | TH | 2004 | 04TH322500         | N/A  | JN248323 |
| 01B   | TH | 2004 | 04TH423323         | N/A  | JN248326 |
| 01B   | TH | 2004 | 04TH704320         | N/A  | JN248331 |
| 01B   | TH | 2004 | 04TH801743         | N/A  | JN248332 |
| 01B   | TH | 2005 | 05TH245651         | N/A  | JN248340 |
| 01B   | TH | 2005 | 05TH443479         | N/A  | JN248349 |
| 01B   | TH | 2005 | 05TH518944         | N/A  | JN248350 |
| 01B   | TH | 2005 | 05TH637314         | N/A  | JN248352 |
| 01B   | TH | 2005 | 05TH852327         | N/A  | JN248357 |
| 01B   | TH | 2005 | 05TH140456         | N/A  | JN631793 |
| 01B   | TH | 2005 | AA095a_WG16        | N/A  | JX447827 |
| 01B   | TH | 2005 | AA106c05R          | N/A  | JX448016 |

|       |    |      |                    |      |          |
|-------|----|------|--------------------|------|----------|
| 01B   | TH | 2006 | 40CC3              | N/A  | EU743760 |
| 01B   | TH | 2006 | 40PB1              | N/A  | EU743761 |
| 01B   | TH | 2006 | 40PB3              | N/A  | EU743762 |
| 01B   | TH | 2006 | AA020a wg2         | N/A  | JX446927 |
| 01B   | TH | 2006 | AA025a WG1         | N/A  | JX446997 |
| 01B   | TH | 2006 | AA084a WG10        | N/A  | JX447668 |
| 01B   | TH | 2007 | WN07               | N/A  | GQ916570 |
| 01B   | TH | 2007 | MERLBDTRC3         | N/A  | JN860762 |
| 01B   | TH | 2007 | MERLBDTRC6         | N/A  | JN860765 |
| 01B   | TH | 2007 | AA096a WG1         | N/A  | JX447833 |
| 01B   | TH | -    | NP1623             | N/A  | AF362994 |
| 01B   | TH | -    | TH283              | N/A  | AF468970 |
| 01B   | TH | -    | 1269               | N/A  | AF490973 |
| 01B   | TH | -    | TH9_95             | N/A  | AF490974 |
| 01B   | TH | -    | TH_13-26           | N/A  | AY082968 |
| 01B   | TH | -    | MU2003             | N/A  | DQ354122 |
| 01B   | TH | -    | CU98_26            | N/A  | EF192591 |
| 01BC  | CN | 2007 | 07CNYN330          | SU   | KF835517 |
| 01BC  | CN | 2007 | 07CNYN334          | SU   | KF835520 |
| 01BC  | CN | 2007 | 07CNYN358          | N/A  | KF835537 |
| 01BC  | CN | 2008 | BH095              | N/A  | KF803580 |
| 01BC  | CN | 2010 | DH02               | SH   | KF250395 |
| 01BC  | CN | 2010 | DH07               | SH   | KF250398 |
| 01BC  | CN | 2010 | JL.RF01            | SH   | KF850149 |
| 01BC  | CN | 2010 | JL.RF05            | SH   | KJ184177 |
| 01BC  | CN | 2011 | ANHUI_BB17         | MSM  | KC183774 |
| 01BC  | CN | 2011 | ANHUI_WH69         | MSM  | KC183781 |
| 01BC  | CN | 2012 | DH28               | SH   | KF250407 |
| 01BC  | CN | 2013 | S15-5h4-3h2-FL     | MSM  | KP170487 |
| 01BC  | CN | 2013 | 01BC.CN.2011.11312 | SH   | KU501257 |
| 01BC  | CN | 2013 | SZ44LS7251         | SH   | KX378999 |
| 01BC  | CN | 2013 | SZ95LS8027         | SH   | KX379000 |
| 01BC  | CN | 2014 | BJ.2014.MSM.SP01   | MSM  | KP668994 |
| 01BC  | CN | 2014 | XC2014EU01         | SH   | KX353919 |
| 01BC  | CN | 2015 | ZJCIQ15005         | N/A  | KX010453 |
| 01BC  | CN | 2015 | YA1996-00-NFLG     | N/A  | MF084205 |
| 01BC  | MM | 1999 | mIDU107            | PWID | AB097868 |
| 01BC  | MM | 2000 | mCSW503            | SW   | AB097866 |
| 01BC  | MM | 2008 | 08mLDTD011         | SH   | KP455640 |
| 01BC  | MM | 2013 | mSSDU139           | PWID | KU820827 |
| 01BC  | MM | 2013 | mSSDU153           | PWID | KU820830 |
| 01BC  | MM | 2013 | mSSDU199           | PWID | KU820838 |
| 01BC  | MM | 2013 | mSSDU247           | PWID | KU820841 |
| 01BC  | MM | 2014 | mKSUDU24           | PWID | KU820848 |
| 01C   | CN | 2008 | 08YN080            | SH   | HM138656 |
| 01C   | CN | 2010 | DH18               | SH   | KF250401 |
| 01C   | CN | 2012 | kang140-NFL        | MSM  | KJ778896 |
| 01C   | CN | 2013 | kang019a-NFL       | MSM  | KJ778895 |
| 01C   | CN | 2014 | 12YN10159          | SH   | KT321211 |
| 01C   | IN | 1998 | NARI-FLS_VB5       | SH   | KT175204 |
| 01C   | IN | 2014 | NARI_FLS_YCM-151   | SH   | KT074935 |
| 01C   | MM | 2013 | mSSDU101           | PWID | KU820822 |
| 01C   | NP | 2011 | 11NP004            | SH   | KJ158422 |
| 01C   | NP | 2011 | 11NP016            | SH   | KJ158427 |
| 01C   | NP | 2011 | 11NP091            | SH   | KJ158437 |
| 01C   | NP | 2011 | 11NP115            | MSM  | KJ541850 |
| 01C   | TH | -    | NP1809             | N/A  | AY262830 |
| 01CD  | NP | 2011 | 11NP076            | SH   | KJ541842 |
| 02_AG | CN | 2004 | CNE85_U            | N/A  | HQ700002 |
| 02_AG | KR | 2007 | 07MHI10            | SH   | JQ316136 |
| 02_AG | KR | 2012 | 12MHR9             | SW   | KF561435 |
| 02_AG | PK | 2014 | PK005              | PWID | KX232598 |
| 02_AG | PK | 2015 | PK024              | PWID | KX232616 |
| 02_AG | PK | 2015 | PK032              | PWID | KX232622 |
| 02_AG | PK | 2015 | PK035              | PWID | KX232625 |
| 02_AG | TH | 2007 | AA039a11R          | N/A  | JX447146 |



|       |    |      |                    |      |          |
|-------|----|------|--------------------|------|----------|
| 02A1  | PK | 2014 | DEURF14PK006       | PWID | KU749413 |
| 02A1  | PK | 2014 | DEURF14PK015       | PWID | KU749414 |
| 02A1  | PK | 2014 | PK003              | PWID | KX232596 |
| 02A1  | PK | 2014 | PK008              | PWID | KX232601 |
| 02A1  | PK | 2014 | PK012              | PWID | KX232605 |
| 02A1  | PK | 2014 | PK019              | PWID | KX232612 |
| 02A1  | PK | 2015 | PK023              | PWID | KX232615 |
| 02A1  | PK | 2015 | PK025              | N/A  | KX232617 |
| 02A1  | PK | 2015 | PK033              | PWID | KX232623 |
| 02A1  | PK | 2015 | PK038              | PWID | KX232627 |
| 02A1  | PK | 2015 | PK039              | PWID | KX232628 |
| 02A1  | PK | 2015 | PK040              | PWID | KX232629 |
| 07 BC | CN | 1997 | 97CN001 C54        | PWID | AF286226 |
| 07 BC | CN | 1998 | 98CN009            | N/A  | AF286230 |
| 07 BC | CN | 2003 | BC14 BJ25 51       | SU   | EU363844 |
| 07 BC | CN | 2004 | CH064              | PWID | EF117254 |
| 07 BC | CN | 2004 | CH070              | PWID | EF117255 |
| 07 BC | CN | 2004 | CH091              | PWID | EF117256 |
| 07 BC | CN | 2004 | CH110              | PWID | EF117257 |
| 07 BC | CN | 2004 | CH111              | PWID | EF117258 |
| 07 BC | CN | 2004 | CH181              | PWID | EF117259 |
| 07 BC | CN | 2004 | CH120              | PWID | EF117260 |
| 07 BC | CN | 2004 | CH119              | PWID | EF117261 |
| 07 BC | CN | 2004 | CH117              | PWID | EF117262 |
| 07 BC | CN | 2004 | CH115              | PWID | EF117263 |
| 07 BC | CN | 2004 | CH114              | PWID | EF117264 |
| 07 BC | CN | 2004 | CBJ008             | PWID | JF346900 |
| 07 BC | CN | 2004 | CBJA017            | PWID | JF346901 |
| 07 BC | CN | 2004 | CBJA021            | PWID | JF346902 |
| 07 BC | CN | 2004 | CBJA022            | PWID | JF346903 |
| 07 BC | CN | 2004 | CBJA023            | PWID | JF346904 |
| 07 BC | CN | 2004 | CBJA025            | PWID | JF346905 |
| 07 BC | CN | 2004 | CBJA028            | PWID | JF346906 |
| 07 BC | CN | 2005 | XJDC6441           | SH   | EF368370 |
| 07 BC | CN | 2005 | XJN0084            | PWID | EF368371 |
| 07 BC | CN | 2005 | XJDC6431 2         | PWID | EF368372 |
| 07 BC | CN | 2005 | pXJDC6441-2        | PWID | EF420986 |
| 07 BC | CN | 2005 | BC07 YN109 6       | PWID | EU363837 |
| 07 BC | CN | 2005 | BC10 YN55 3        | PWID | EU363840 |
| 07 BC | CN | 2005 | BC18 XJ153 35      | PWID | EU363848 |
| 07 BC | CN | 2005 | pXJDC6291-13       | PWID | KC492737 |
| 07 BC | CN | 2006 | CNHLJ M06054       | N/A  | EU131811 |
| 07 BC | CN | 2006 | CNE92 U            | N/A  | HQ699994 |
| 07 BC | CN | 2006 | CBJB347            | PWID | JF346915 |
| 07 BC | CN | 2006 | Sichuan 2006 SC006 | PWID | JX392378 |
| 07 BC | CN | 2006 | Sichuan 2006 SC020 | PWID | JX392380 |
| 07 BC | CN | 2006 | Sichuan 2006 SC025 | PWID | JX392381 |
| 07 BC | CN | 2006 | Sichuan 2006 SC124 | PWID | JX392382 |
| 07 BC | CN | 2006 | Xinjiang 2006 709  | PWID | JX392383 |
| 07 BC | CN | 2006 | Xinjiang 2006 713  | PWID | JX392384 |
| 07 BC | CN | 2006 | SC070059           | PWID | KF250376 |
| 07 BC | CN | 2007 | BJOX002000 01 3    | PWID | HM215363 |
| 07 BC | CN | 2007 | BJOX011000 01 3    | MSM  | HM215375 |
| 07 BC | CN | 2007 | BJOX019000 02 1    | MSM  | HM215380 |
| 07 BC | CN | 2007 | BJOX027000 02 1    | MSM  | HM215388 |
| 07 BC | CN | 2007 | BJOX029000 03 1    | MSM  | HM215392 |
| 07 BC | CN | 2007 | CNE19              | SH   | HM215405 |
| 07 BC | CN | 2007 | CNE20              | SH   | HM215406 |
| 07 BC | CN | 2007 | CNE21              | SH   | HM215407 |
| 07 BC | CN | 2007 | CNE39              | N/A  | HQ699965 |
| 07 BC | CN | 2007 | CNE68              | SH   | HQ699982 |
| 07 BC | CN | 2007 | CNE69              | N/A  | HQ699983 |
| 07 BC | CN | 2007 | CNE70              | N/A  | HQ699984 |
| 07 BC | CN | 2007 | CNGZD              | PWID | JQ423923 |
| 07 BC | CN | 2007 | BJ070032           | MSM  | KF250366 |
| 07 BC | CN | 2007 | GD070145           | PWID | KF250371 |

|       |    |      |                     |      |          |
|-------|----|------|---------------------|------|----------|
| 07 BC | CN | 2007 | GZ070087            | MSM  | KF250372 |
| 07 BC | CN | 2007 | HB070037            | SH   | KF250373 |
| 07 BC | CN | 2007 | JS070205            | SH   | KF250374 |
| 07 BC | CN | 2007 | NX070014            | PWID | KF250375 |
| 07 BC | CN | 2007 | XJ070248            | PWID | KF250377 |
| 07 BC | CN | 2007 | xj070241            | SH   | KF250385 |
| 07 BC | CN | 2007 | 07CNYN303           | PWID | KF835494 |
| 07 BC | CN | 2007 | 07CNYN323           | PWID | KF835510 |
| 07 BC | CN | 2007 | 07CNYN324           | PWID | KF835511 |
| 07 BC | CN | 2007 | 07CNYN349           | PWID | KF835532 |
| 07 BC | CN | 2007 | BJOX016000.e02      | MSM  | KM217857 |
| 07 BC | CN | 2008 | 1114                | MSM  | HQ215552 |
| 07 BC | CN | 2008 | 08LNA001            | MSM  | JX960601 |
| 07 BC | CN | 2008 | BJOX037000.e01      | MSM  | KM218157 |
| 07 BC | CN | 2009 | CBJA552             | PWID | JF346907 |
| 07 BC | CN | 2009 | CBJA555             | PWID | JF346908 |
| 07 BC | CN | 2009 | CBJA556             | PWID | JF346909 |
| 07 BC | CN | 2009 | CBJA557             | PWID | JF346910 |
| 07 BC | CN | 2009 | CBJA558             | PWID | JF346911 |
| 07 BC | CN | 2009 | CBJA561             | PWID | JF346912 |
| 07 BC | CN | 2009 | CBJA563             | PWID | JF346913 |
| 07 BC | CN | 2009 | CBJA570             | PWID | JF346914 |
| 07 BC | CN | 2009 | 09LNA446            | MSM  | JX960600 |
| 07 BC | CN | 2009 | 09LNA745            | MSM  | JX960602 |
| 07 BC | CN | -    | CNGL179             | N/A  | AF503396 |
| 07 BC | CN | -    | BC02_XJ74_2         | PWID | EU363832 |
| 07 BC | CN | -    | BC12_SC142_6        | PWID | EU363842 |
| 07 BC | CN | -    | BC16_BJ29_34        | SU   | EU363846 |
| 07 BC | CN | -    | HB5_3               | N/A  | HQ326124 |
| 07 BC | CN | -    | BJ22_5              | N/A  | HQ326125 |
| 07 BC | CN | -    | BJ24_3              | N/A  | HQ326126 |
| 07 BC | CN | -    | SC11_59             | N/A  | HQ326127 |
| 07 BC | CN | -    | SC19_15             | N/A  | HQ326129 |
| 07 BC | CN | -    | SC20_15             | N/A  | HQ326130 |
| 07 BC | CN | -    | SC21_28             | N/A  | HQ326131 |
| 07 BC | CN | -    | SC22_16             | N/A  | HQ326132 |
| 07 BC | CN | -    | XJ16_6              | N/A  | HQ326133 |
| 07 BC | CN | -    | XJ47_5              | N/A  | HQ326134 |
| 07 BC | CN | -    | XJ50_6              | N/A  | HQ326135 |
| 07 BC | CN | -    | XJ180_29            | N/A  | HQ326136 |
| 07 BC | CN | -    | YN99r_5             | N/A  | HQ326137 |
| 07 BC | CN | -    | YN108r_4            | N/A  | HQ326138 |
| 07 BC | CN | -    | YN148r_9            | N/A  | HQ326139 |
| 07 BC | CN | -    | GX33m_25            | N/A  | HQ326141 |
| 07 BC | CN | -    | GX45_57             | N/A  | HQ326143 |
| 07 BC | CN | -    | GX84_59             | N/A  | HQ326146 |
| 07 BC | MM | 2013 | mSSDU163            | PWID | KU820832 |
| 07 BC | TW | 2004 | TW_D3               | PWID | DQ230841 |
| 07 BC | TW | 2013 | pCRF07              | PWID | KF234628 |
| 07B   | TW | 2004 | TW_D60              | PWID | DQ230842 |
| 08 BC | CN | 1997 | 97CNGX_6F           | PWID | AY008715 |
| 08 BC | CN | 1997 | 97CNGX_7F           | PWID | AY008716 |
| 08 BC | CN | 1997 | 97CNGX_9F           | PWID | AY008717 |
| 08 BC | CN | 1998 | 98CN006             | N/A  | AF286229 |
| 08 BC | CN | 2000 | p00CH-WS035_08_BC51 | PWID | AB746344 |
| 08 BC | CN | 2000 | p00CH-HH090_08_BC02 | PWID | AB773884 |
| 08 BC | CN | 2000 | QJ001               | N/A  | KC914396 |
| 08 BC | CN | 2001 | p01CH-DL001_08_BC06 | N/A  | AB746342 |
| 08 BC | CN | 2005 | BC06_YNP45_45       | PWID | EU363836 |
| 08 BC | CN | 2006 | BC01_YN161_5        | PWID | EU363831 |
| 08 BC | CN | 2006 | BC17_YN78_8         | PWID | EU363847 |
| 08 BC | CN | 2006 | nx2                 | N/A  | HM067748 |
| 08 BC | CN | 2007 | CNE52               | PWID | HM215416 |
| 08 BC | CN | 2007 | CNE53               | PWID | HM215417 |
| 08 BC | CN | 2007 | CNE22               | N/A  | HQ699952 |
| 08 BC | CN | 2007 | CNE24               | N/A  | HQ699953 |

|        |    |      |              |      |          |
|--------|----|------|--------------|------|----------|
| 08 BC  | CN | 2007 | CNE25        | N/A  | HQ699954 |
| 08 BC  | CN | 2007 | CNE29        | N/A  | HQ699957 |
| 08 BC  | CN | 2007 | CNE32        | N/A  | HQ699958 |
| 08 BC  | CN | 2007 | CNE33        | N/A  | HQ699959 |
| 08 BC  | CN | 2007 | CNE35        | N/A  | HQ699961 |
| 08 BC  | CN | 2007 | CNE36        | N/A  | HQ699962 |
| 08 BC  | CN | 2007 | CNE37        | N/A  | HQ699963 |
| 08 BC  | CN | 2007 | CNE38        | N/A  | HQ699964 |
| 08 BC  | CN | 2007 | CNE41        | N/A  | HQ699966 |
| 08 BC  | CN | 2007 | CNE42        | N/A  | HQ699967 |
| 08 BC  | CN | 2007 | CNE43        | N/A  | HQ699968 |
| 08 BC  | CN | 2007 | CNE44        | N/A  | HQ699969 |
| 08 BC  | CN | 2007 | CNE45        | N/A  | HQ699970 |
| 08 BC  | CN | 2007 | CNE46        | PWID | HQ699971 |
| 08 BC  | CN | 2007 | CNE47        | PWID | HQ699972 |
| 08 BC  | CN | 2007 | CNE48        | N/A  | HQ699973 |
| 08 BC  | CN | 2007 | CNE49        | PWID | HQ699974 |
| 08 BC  | CN | 2007 | CNE50        | N/A  | HQ699975 |
| 08 BC  | CN | 2007 | CNE54        | N/A  | HQ699976 |
| 08 BC  | CN | 2007 | CNE80 U      | N/A  | HQ700001 |
| 08 BC  | CN | 2007 | CNE51        | N/A  | HQ700004 |
| 08 BC  | CN | 2007 | 2007CNGX_HK  | PWID | JF719819 |
| 08 BC  | CN | 2007 | GD070060     | PWID | KF250368 |
| 08 BC  | CN | 2007 | GD070077     | PWID | KF250369 |
| 08 BC  | CN | 2007 | 07CNYN302    | PWID | KF835493 |
| 08 BC  | CN | 2007 | 07CNYN306    | PWID | KF835495 |
| 08 BC  | CN | 2007 | 07CNYN307    | SU   | KF835496 |
| 08 BC  | CN | 2007 | 07CNYN310    | SU   | KF835497 |
| 08 BC  | CN | 2007 | 07CNYN313    | MB   | KF835500 |
| 08 BC  | CN | 2007 | 07CNYN314    | PWID | KF835501 |
| 08 BC  | CN | 2007 | 07CNYN319    | SU   | KF835506 |
| 08 BC  | CN | 2007 | 07CNYN320    | PWID | KF835507 |
| 08 BC  | CN | 2007 | 07CNYN321    | PWID | KF835508 |
| 08 BC  | CN | 2007 | 07CNYN322    | SU   | KF835509 |
| 08 BC  | CN | 2007 | 07CNYN325    | SU   | KF835512 |
| 08 BC  | CN | 2007 | 07CNYN344    | PWID | KF835529 |
| 08 BC  | CN | 2007 | 07CNYN346    | PWID | KF835530 |
| 08 BC  | CN | 2007 | 07CNYN350    | PWID | KF835531 |
| 08 BC  | CN | 2007 | 07CNYN355    | SU   | KF835534 |
| 08 BC  | CN | 2007 | 07CNYN351    | SU   | KF835535 |
| 08 BC  | CN | 2007 | 07CNYN363    | PWID | KF835541 |
| 08 BC  | CN | 2007 | 07CNYN369    | PWID | KF835545 |
| 08 BC  | CN | 2007 | 07CNYN371    | PWID | KF835547 |
| 08 BC  | CN | -    | YN177 1      | N/A  | HQ326140 |
| 08 BC  | CN | -    | GX43 2       | N/A  | HQ326142 |
| 08 BC  | CN | -    | GX75 20      | N/A  | HQ326144 |
| 08 BC  | MM | 2013 | mSSDU220     | PWID | KU820840 |
| 08 BC  | MM | 2013 | mSSDU91      | PWID | KU820846 |
| 15 01B | TH | 1996 | M169         | SH   | DQ354120 |
| 15 01B | TH | 1999 | 99TH_MU2079  | N/A  | AF516184 |
| 15 01B | TH | 1999 | 99TH_R2399   | N/A  | AF530576 |
| 15 01B | TH | 2002 | 02TH_OUR1331 | N/A  | AF529572 |
| 15 01B | TH | 2002 | 02TH_OUR1332 | N/A  | AF529573 |
| 15 01B | TH | 2004 | 04TH409819   | N/A  | JN248325 |
| 15 01B | TH | 2005 | 05TH522586   | N/A  | JN248351 |
| 15 01B | TH | -    | 3147F5.D15   | N/A  | KJ953197 |
| 16 A2D | KR | 1997 | 97KR004      | SW   | AF286239 |
| 33 01B | ID | 2007 | JKT189-C     | N/A  | AB547463 |
| 33 01B | ID | 2007 | JKT194-C     | SH   | AB547464 |
| 33 01B | MY | 2005 | 05MYKL007 1  | SG   | DQ366659 |
| 33 01B | MY | 2005 | 05MYKL015 2  | SG   | DQ366660 |
| 33 01B | MY | 2005 | 05MYKL031 1  | SH   | DQ366661 |
| 33 01B | MY | 2005 | 05MYKL045 1  | SH   | DQ366662 |
| 33 01B | MY | 2007 | 07MYKLD47    | N/A  | EU031913 |
| 34 01B | TH | 1999 | OUR1969P     | PWID | EF165539 |
| 34 01B | TH | 1999 | OUR2275P     | PWID | EF165540 |

|    |     |    |      |                 |      |          |
|----|-----|----|------|-----------------|------|----------|
| 34 | 01B | TH | 1999 | OUR2478P        | PWID | EF165541 |
| 48 | 01B | MY | 2007 | 07MYKT014       | PWID | GQ175881 |
| 48 | 01B | MY | 2007 | 07MYKT016       | PWID | GQ175882 |
| 48 | 01B | MY | 2007 | 07MYKT021       | PWID | GQ175883 |
| 51 | 01B | MY | 2009 | 09MYKL050       | N/A  | KJ485698 |
| 51 | 01B | MY | 2011 | 11MYKL055       | N/A  | KJ485697 |
| 51 | 01B | SG | 2011 | 11SG HM021      | SG   | JN029801 |
| 51 | 01B | SG | 2011 | 11SG HM091      | SG   | JN029803 |
| 52 | 01B | MY | 2003 | 03MYKL018_1     | SB   | DQ366664 |
| 52 | 01B | TH | 1996 | M043            | SH   | DQ354113 |
| 52 | 01B | TH | 2000 | 00TH R1741      | N/A  | AY945734 |
| 53 | 01B | MY | 2004 | 04MYKL016_1     | SH   | DQ366663 |
| 53 | 01B | MY | 2010 | 10MYKJ079       | PWID | JX390611 |
| 53 | 01B | MY | 2010 | 10MYKJ067       | PWID | JX390612 |
| 53 | 01B | MY | 2011 | 11FIR164        | N/A  | JX390610 |
| 54 | 01B | MY | 2007 | 07MYKLD49       | N/A  | EU031915 |
| 54 | 01B | MY | 2008 | 08MYKL044       | N/A  | JX390977 |
| 54 | 01B | MY | 2009 | 09MYSB023       | N/A  | JX390976 |
| 55 | 01B | CN | 2008 | 08CYM047        | MSM  | JF340054 |
| 55 | 01B | CN | 2010 | HNCS102056      | MSM  | JX574661 |
| 55 | 01B | CN | 2011 | GDDG318         | MSM  | JX574662 |
| 55 | 01B | CN | 2011 | GDDG095         | MSM  | JX574663 |
| 55 | 01B | CN | 2011 | ANHUI FY64      | MSM  | KC183777 |
| 55 | 01B | CN | 2011 | 11HNCS500434    | MSM  | KF927150 |
| 55 | 01B | CN | 2011 | 11CN.GDDG325    | MSM  | KF927151 |
| 57 | BC  | CN | 2007 | 341             | PWID | HM776939 |
| 57 | BC  | CN | 2009 | 1439            | PWID | JX679207 |
| 57 | BC  | CN | 2009 | YNFL37          | SH   | KC870044 |
| 57 | BC  | CN | 2009 | 09YNLX19sg      | PWID | KC899008 |
| 57 | BC  | CN | 2010 | DH17            | SH   | KF250400 |
| 58 | 01B | MY | 2009 | 09MYPR37        | PWID | KC522031 |
| 58 | 01B | MY | 2010 | 10MYKJ036       | PWID | KC522035 |
| 58 | 01B | MY | 2010 | 10MYPR87        | PWID | KF425293 |
| 58 | 01B | MY | 2011 | 11MY1ZK731      | PWID | KC522032 |
| 58 | 01B | MY | 2011 | 11MY1RJ704      | PWID | KC522033 |
| 58 | 01B | MY | 2011 | 11MY1EP794      | PWID | KC522034 |
| 59 | 01B | CN | 2007 | GD070126        | SG   | KF011494 |
| 59 | 01B | CN | 2007 | GX070051        | SG   | KF011495 |
| 59 | 01B | CN | 2009 | 09LNA423        | MSM  | JX960635 |
| 59 | 01B | CN | 2010 | 10LNSY300533    | MSM  | KC462191 |
| 59 | 01B | CN | 2011 | 11LNSY300392    | MSM  | KC462190 |
| 59 | 01B | CN | 2011 | 11CN.GDMM152    | MSM  | KJ484433 |
| 59 | 01B | CN | 2011 | 11CN.LNSY300876 | SH   | KJ484434 |
| 59 | 01B | CN | 2012 | 12CN.YNKM200199 | MSM  | KJ484435 |
| 61 | BC  | CN | 2007 | FJ070004        | PB   | KC990125 |
| 61 | BC  | CN | 2007 | JL070009        | SH   | KC990126 |
| 61 | BC  | CN | 2010 | JL100010        | SH   | KC990124 |
| 62 | BC  | CN | 2010 | YNFL13          | PWID | KC870034 |
| 62 | BC  | CN | 2010 | YNFL15          | SH   | KC870035 |
| 62 | BC  | CN | 2010 | YNFL18          | SH   | KC870037 |
| 64 | BC  | CN | 2009 | YNFL08          | PWID | KC870031 |
| 64 | BC  | CN | 2009 | YNFL31          | SH   | KC870042 |
| 64 | BC  | CN | 2009 | YNFL33          | PWID | KC870043 |
| 64 | BC  | CN | 2009 | 09YNLX047sg     | PWID | KC898994 |
| 64 | BC  | CN | 2009 | 09YNLX219037sg  | PWID | KC899009 |
| 64 | BC  | CN | 2010 | YNFL10_1        | PWID | KC870032 |
| 64 | BC  | CN | 2010 | YNFL16          | SH   | KC870036 |
| 64 | BC  | CN | 2010 | YNFL22          | SH   | KC870040 |
| 65 | cpx | CN | 2009 | YNFL05          | SH   | KC870030 |
| 65 | cpx | CN | 2010 | YNFL01          | SH   | KC870027 |
| 65 | cpx | CN | 2010 | YNFL02          | SH   | KC870028 |
| 65 | cpx | CN | 2011 | ANHUI HF104     | MSM  | KC183778 |
| 67 | 01B | CN | 2011 | ANHUI HF115     | MSM  | KC183779 |
| 67 | 01B | CN | 2011 | ANHUI MAS59     | MSM  | KC183780 |
| 68 | 01B | CN | 2010 | JS2010001       | MSM  | KF758551 |
| 68 | 01B | CN | 2011 | ANHUI WH73      | MSM  | KC183782 |

|        |    |      |                  |      |          |
|--------|----|------|------------------|------|----------|
| 68 01B | CN | 2011 | ANHUI XC46       | MSM  | KC183783 |
| 69 01B | JP | 2003 | 03JP-5091K231    | MSM  | AB845344 |
| 69 01B | JP | 2004 | 04JP-5091K320    | MSM  | AB845345 |
| 69 01B | JP | 2004 | 04JP-5091K323    | MSM  | AB845346 |
| 69 01B | JP | 2005 | 05JP-5091K448    | MSM  | AB845347 |
| 69 01B | JP | 2010 | 10JP-5091N172    | SB   | AB845348 |
| 69 01B | JP | 2010 | 10JP-5091N200    | SH   | AB845349 |
| 74 01B | MY | 2010 | 10MYKJ052        | PWID | KR019770 |
| 74 01B | MY | 2010 | 10MYPR268        | PWID | KR019771 |
| 74 01B | MY | 2011 | 11MYPR416        | PWID | KR019772 |
| 77 cpx | MY | 2013 | 13MYNBB108       | N/A  | KX673818 |
| 77 cpx | MY | 2014 | 14MYNBB084       | N/A  | KX673819 |
| 77 cpx | MY | 2014 | 14MYNBB090       | N/A  | KX673820 |
| 77 cpx | MY | 2014 | 14MYNBB164       | N/A  | KX673821 |
| 78 cpx | CN | 2013 | YNTC19           | SH   | KU161143 |
| 78 cpx | CN | 2013 | YNTC35           | SH   | KU161144 |
| 78 cpx | CN | 2013 | YNTC88           | PWID | KU161145 |
| 82 cpx | MM | 2013 | mSSDU12          | PWID | KU820825 |
| 82 cpx | MM | 2013 | mSSDU160         | PWID | KU820831 |
| 82 cpx | MM | 2013 | mSSDU191         | PWID | KU820836 |
| 82 cpx | MM | 2013 | mSSDU195         | PWID | KU820837 |
| 82 cpx | MM | 2013 | mSSDU63          | PWID | KU820844 |
| 82 cpx | MM | 2013 | mSSDU75          | PWID | KU820845 |
| 83 cpx | MM | 2013 | mSSDU109         | PWID | KU820823 |
| 83 cpx | MM | 2013 | mSSDU118         | PWID | KU820824 |
| 83 cpx | MM | 2013 | mSSDU137         | PWID | KU820826 |
| 83 cpx | MM | 2013 | mSSDU144         | PWID | KU820828 |
| 83 cpx | MM | 2013 | mSSDU151         | PWID | KU820829 |
| 83 cpx | MM | 2013 | mSSDU178         | PWID | KU820833 |
| 83 cpx | MM | 2013 | mSSDU180         | PWID | KU820834 |
| 83 cpx | MM | 2013 | mSSDU21          | PWID | KU820839 |
| 83 cpx | MM | 2013 | mSSDU24          | PWID | KU820842 |
| 83 cpx | MM | 2013 | mSSDU28          | PWID | KU820843 |
| 83 cpx | MM | 2013 | mSSDU94          | PWID | KU820847 |
| 85 BC  | CN | 2014 | 14CN_SCYB1       | SH   | KU992928 |
| 85 BC  | CN | 2014 | 14CN_SCYB2       | SH   | KU992929 |
| 85 BC  | CN | 2014 | 14CN_SCYB20      | SH   | KU992930 |
| 85 BC  | CN | 2014 | 14CN_SCYB3       | SH   | KU992931 |
| 85 BC  | CN | 2014 | 14CN_SCYB4       | SH   | KU992932 |
| 85 BC  | CN | 2014 | 14CN_SCYB7       | SH   | KU992934 |
| 85 BC  | CN | 2014 | 14CN_SCYB11      | SH   | KU992935 |
| 85 BC  | CN | 2014 | 14CN_SCYB12      | SH   | KU992936 |
| 85 BC  | CN | 2014 | 14CN_SCYB18      | SH   | KU992937 |
| 86 BC  | CN | 2013 | 15YNHS18         | SH   | KX582249 |
| 86 BC  | CN | 2013 | 15YNHS23         | SH   | KX582250 |
| 86 BC  | CN | 2013 | 15YNHS26         | SH   | KX582251 |
| 87 cpx | CN | 2009 | 09YNLC497sg      | PWID | KC898992 |
| 87 cpx | CN | 2009 | 09YNRL215050sg   | PWID | KC899012 |
| 87 cpx | CN | 2012 | DH32             | SH   | KF250408 |
| 88 BC  | CN | 2005 | 05YNRL07sg       | PWID | KC898975 |
| 88 BC  | CN | 2005 | 05YNRL25sg       | PWID | KC898979 |
| 88 BC  | CN | 2009 | DH19             | PWID | KF250402 |
| A1     | IN | 1997 | NARI-FLS VB6     | SH   | KT152840 |
| A1     | IN | 1999 | NARI-FLS VB11    | SH   | KT152841 |
| A1     | IN | 1999 | NARI-FLS VB15    | SH   | KT152842 |
| A1     | IN | 1999 | NARI-FLS VB81-4  | SH   | KT152843 |
| A1     | IN | 2000 | NARI-FLS VB99-30 | MB   | KT152846 |
| A1     | IN | 2009 | NARI-FLS IVC19-1 | SH   | KT152839 |
| A1     | NP | 2011 | 11NP086          | SH   | KJ158436 |
| A1     | PK | 2014 | DEMA114PK001     | SH   | KU749409 |
| A1     | PK | 2014 | DEMA114PK002     | SH   | KU749410 |
| A1     | PK | 2014 | DEMA114PK013     | PWID | KU749411 |
| A1     | PK | 2014 | PK004            | PWID | KX232597 |
| A1     | PK | 2014 | PK007            | PWID | KX232600 |
| A1     | PK | 2014 | PK014            | PWID | KX232607 |
| A1     | PK | 2014 | PK016            | PWID | KX232609 |

|     |    |      |                    |      |          |
|-----|----|------|--------------------|------|----------|
| A1  | PK | 2014 | PK017              | PWID | KX232610 |
| A1  | PK | 2014 | PK018              | PWID | KX232611 |
| A1  | PK | 2014 | PK020              | PWID | KX232613 |
| A1  | PK | 2014 | PK027              | PWID | KX232619 |
| A1  | PK | 2015 | PK021              | PWID | KX232614 |
| A1  | PK | 2015 | PK026              | PWID | KX232618 |
| A1  | PK | 2015 | PK030              | PWID | KX232620 |
| A1  | PK | 2015 | PK031              | PWID | KX232621 |
| A1  | PK | 2015 | PK034              | PWID | KX232624 |
| A1  | PK | 2015 | PK036              | PWID | KX232626 |
| A1C | IN | 1995 | 95IN21301          | SH   | AF067156 |
| A1C | IN | 1999 | NARI-FLS VB27-5    | SH   | KT175205 |
| A1C | IN | 2001 | 1579A              | N/A  | DQ083238 |
| A1C | IN | 2006 | NARI-FLS IVC3-1.28 | SH   | KT175202 |
| A1C | IN | 2009 | NARI-FLS 09-387    | SH   | KC911635 |
| A1C | NP | 2011 | 11NP122            | MSM  | KJ541851 |
| B   | CN | 1998 | YN9802             | PWID | JF932495 |
| B   | CN | 1998 | YN9838             | PWID | JF932496 |
| B   | CN | 1999 | plwj               | PB   | GU177863 |
| B   | CN | 2001 | CNHN24             | PB   | AY180905 |
| B   | CN | 2002 | 02HNsmx2           | N/A  | DQ007901 |
| B   | CN | 2002 | 02HNsq4            | N/A  | DQ007902 |
| B   | CN | 2002 | 02HNsc11           | N/A  | DQ007903 |
| B   | CN | 2003 | CHNHLJBSF03009c34  | N/A  | AY905493 |
| B   | CN | 2003 | CNHLJBM03010       | N/A  | EU131793 |
| B   | CN | 2003 | B01                | NO   | EU363825 |
| B   | CN | 2003 | B02                | NO   | EU363826 |
| B   | CN | 2003 | B03                | SU   | EU363827 |
| B   | CN | 2003 | SHXDC0081          | SH   | JF932492 |
| B   | CN | 2004 | CHNHLJSM04028c3    | N/A  | AY905494 |
| B   | CN | 2004 | CHNHLJBF04029c2    | N/A  | AY905495 |
| B   | CN | 2004 | CHNHLJSM0417c3     | N/A  | AY905496 |
| B   | CN | 2004 | CHNHLJBF04016c4    | N/A  | AY905497 |
| B   | CN | 2004 | CNHLJBM04038       | N/A  | EU131787 |
| B   | CN | 2004 | CNHLJBF04026       | N/A  | EU131788 |
| B   | CN | 2004 | CNHLJBM04020       | N/A  | EU131789 |
| B   | CN | 2004 | CNHLJBF04025       | N/A  | EU131790 |
| B   | CN | 2004 | CNHLJBF04024       | N/A  | EU131791 |
| B   | CN | 2004 | CNHLJBF04019       | N/A  | EU131792 |
| B   | CN | 2004 | CNHLJBM04018       | N/A  | EU131796 |
| B   | CN | 2004 | CNHLJBF04023       | N/A  | EU131797 |
| B   | CN | 2004 | CNHLJBF04021       | N/A  | EU131801 |
| B   | CN | 2004 | CNHLJBF04032       | N/A  | EU131806 |
| B   | CN | 2004 | CNHLJBF04030       | N/A  | EU131808 |
| B   | CN | 2004 | CNE10              | PB   | HM215397 |
| B   | CN | 2004 | CNE12              | SH   | HM215399 |
| B   | CN | 2004 | CNE14              | SH   | HM215400 |
| B   | CN | 2004 | CNE13              | N/A  | HQ699951 |
| B   | CN | 2004 | CNE63              | N/A  | HQ699978 |
| B   | CN | 2004 | CNE64              | PB   | HQ699979 |
| B   | CN | 2004 | CNE82 U            | N/A  | HQ699989 |
| B   | CN | 2004 | CNE83 U            | N/A  | HQ699990 |
| B   | CN | 2004 | CNE99 U            | N/A  | HQ699996 |
| B   | CN | 2004 | CNE100 U           | N/A  | HQ699997 |
| B   | CN | 2005 | 05CNHB hp3         | MB   | DQ990880 |
| B   | CN | 2005 | CNHLJBM05036       | N/A  | EU131803 |
| B   | CN | 2005 | CNE11              | PB   | HM215398 |
| B   | CN | 2005 | CNE57              | MSM  | HM215420 |
| B   | CN | 2005 | CNE9               | SH   | HM215428 |
| B   | CN | 2005 | CNE95 U            | N/A  | HQ699995 |
| B   | CN | 2005 | CNE101 U           | N/A  | HQ699998 |
| B   | CN | 2006 | CNHLJSM06048       | N/A  | EU131794 |
| B   | CN | 2006 | CNHLJBM06050       | N/A  | EU131798 |
| B   | CN | 2006 | CNHLJBM06057       | N/A  | EU131800 |
| B   | CN | 2006 | CNHLJBF06051       | N/A  | EU131802 |
| B   | CN | 2006 | CNHLJSF06056       | N/A  | EU131804 |

|   |    |      |                 |      |          |
|---|----|------|-----------------|------|----------|
| B | CN | 2006 | CNHLJBF06044    | N/A  | EU131805 |
| B | CN | 2006 | CNHLJ M06053    | N/A  | EU131807 |
| B | CN | 2006 | CNHLJ M06058    | N/A  | EU131809 |
| B | CN | 2006 | CNHLJSF06060    | N/A  | EU131810 |
| B | CN | 2006 | B04             | NO   | EU363828 |
| B | CN | 2006 | B05             | NO   | EU363829 |
| B | CN | 2006 | CNE4            | PWID | HM215413 |
| B | CN | 2006 | CNE6            | PWID | HM215423 |
| B | CN | 2006 | CNE1            | PWID | HQ699949 |
| B | CN | 2006 | CC056           | N/A  | JF932482 |
| B | CN | 2007 | BJOX003000 19 1 | MSM  | HM215365 |
| B | CN | 2007 | BJOX006000 13 3 | MSM  | HM215369 |
| B | CN | 2007 | BJOX007000 02 3 | MSM  | HM215370 |
| B | CN | 2007 | BJOX020000 03 3 | MSM  | HM215382 |
| B | CN | 2007 | BJOX022000 02 3 | MSM  | HM215384 |
| B | CN | 2007 | CNE105 U        | N/A  | HQ700000 |
| B | CN | 2007 | AH070011        | N/A  | JF932468 |
| B | CN | 2007 | AH070014        | N/A  | JF932469 |
| B | CN | 2007 | AH070017        | N/A  | JF932470 |
| B | CN | 2007 | AH070018        | N/A  | JF932471 |
| B | CN | 2007 | AH070057        | N/A  | JF932472 |
| B | CN | 2007 | BJ070030        | PWID | JF932473 |
| B | CN | 2007 | CBJC261         | N/A  | JF932474 |
| B | CN | 2007 | CBJC392         | N/A  | JF932475 |
| B | CN | 2007 | CBJC394         | N/A  | JF932476 |
| B | CN | 2007 | CBJC396         | N/A  | JF932477 |
| B | CN | 2007 | FJ070016        | SH   | JF932483 |
| B | CN | 2007 | GS070017        | NO   | JF932484 |
| B | CN | 2007 | GZ070002        | N/A  | JF932485 |
| B | CN | 2007 | GZ070030        | N/A  | JF932486 |
| B | CN | 2007 | HB070006        | N/A  | JF932487 |
| B | CN | 2007 | HB070022        | N/A  | JF932488 |
| B | CN | 2007 | HB070035        | N/A  | JF932489 |
| B | CN | 2007 | JL070038        | N/A  | JF932490 |
| B | CN | 2007 | JS070389        | SH   | JF932491 |
| B | CN | 2007 | SX070080        | SH   | JF932493 |
| B | CN | 2007 | hb070025        | N/A  | JF932499 |
| B | CN | 2007 | hen1345         | N/A  | JF932500 |
| B | CN | 2007 | BJOX004000.e03  | MSM  | KM217617 |
| B | CN | 2007 | BJOX014000.e01  | MSM  | KM217780 |
| B | CN | 2008 | 1106            | MSM  | HQ215554 |
| B | CN | 2008 | CBJC502         | PB   | JF346917 |
| B | CN | 2008 | CBJC507         | PB   | JF346918 |
| B | CN | 2008 | CBJC513         | PB   | JF346919 |
| B | CN | 2008 | CBJC476         | N/A  | JF932478 |
| B | CN | 2008 | CBJC489         | N/A  | JF932479 |
| B | CN | 2008 | CBJC500         | N/A  | JF932480 |
| B | CN | 2008 | CBJC503         | N/A  | JF932481 |
| B | CN | 2008 | cbjc468         | N/A  | JF932498 |
| B | CN | 2008 | BJOX035000.e01  | MSM  | KM218138 |
| B | CN | 2008 | BJOX041000.e01  | MSM  | KM218159 |
| B | CN | 2008 | BJOX046000.e01  | MSM  | KM218184 |
| B | CN | 2008 | BJOX047000.e01  | MSM  | KM218210 |
| B | CN | 2009 | 1121            | MSM  | HQ215556 |
| B | CN | 2009 | CBJC485         | PB   | JF346916 |
| B | CN | 2009 | YN09P0014       | PWID | JF932494 |
| B | CN | 2009 | ZK042           | N/A  | JF932497 |
| B | CN | 2009 | 09LNA014        | MSM  | JX960597 |
| B | CN | 2009 | 09LNA439        | MSM  | JX960598 |
| B | CN | 2009 | 09LNA336        | MSM  | JX960599 |
| B | CN | 2009 | DEMB09CN002     | SH   | KC596066 |
| B | CN | 2009 | 09YNRL215042sg  | PWID | KC899011 |
| B | CN | 2009 | DEMB09CN013     | MSM  | KP109510 |
| B | CN | 2010 | DEMB10CN002     | N/A  | JX140658 |
| B | CN | 2012 | DEMB12CN006     | MSM  | KP109511 |
| B | CN | 2012 | DEMB12CN010     | SH   | KP109512 |

|   |    |      |                |      |          |
|---|----|------|----------------|------|----------|
| B | CN | 2012 | 134-0-10       | N/A  | KX692903 |
| B | CN | 2012 | 15-0-10        | N/A  | KX692925 |
| B | CN | 2012 | 2019-0-2       | N/A  | KX692941 |
| B | CN | 2012 | 2039-0-1       | N/A  | KX692948 |
| B | CN | 2012 | 2079-1         | N/A  | KX692969 |
| B | CN | 2012 | 2081-1         | N/A  | KX692980 |
| B | CN | 2012 | 2092-0-1       | N/A  | KX692997 |
| B | CN | 2012 | 2097-0-10      | N/A  | KX693025 |
| B | CN | 2012 | 2110-10        | N/A  | KX693036 |
| B | CN | 2012 | 2124-0-1       | N/A  | KX693054 |
| B | CN | 2012 | 2142-0-1       | N/A  | KX693065 |
| B | CN | 2012 | 2157-1         | N/A  | KX693075 |
| B | CN | 2012 | 2162-11        | N/A  | KX693092 |
| B | CN | 2012 | 2243-0-3       | N/A  | KX693099 |
| B | CN | 2012 | 2259-1         | N/A  | KX693100 |
| B | CN | 2012 | 2350-0-1       | N/A  | KX693113 |
| B | CN | 2012 | 2357-11        | N/A  | KX693131 |
| B | CN | 2012 | 2358-0-1       | N/A  | KX693150 |
| B | CN | 2012 | 2360-0-1a      | N/A  | KX693166 |
| B | CN | 2012 | 2361-0-1       | N/A  | KX693171 |
| B | CN | 2012 | 2362-0-1       | N/A  | KX693190 |
| B | CN | 2012 | 2363-1         | N/A  | KX693215 |
| B | CN | 2012 | 2406-12        | N/A  | KX693238 |
| B | CN | 2012 | 2408-0-1       | N/A  | KX693247 |
| B | CN | 2012 | 2418-0-14      | N/A  | KX693265 |
| B | CN | 2012 | 2460-11        | N/A  | KX693281 |
| B | CN | 2012 | 3124-0-17      | N/A  | KX693301 |
| B | CN | 2012 | 3559-11        | N/A  | KX693308 |
| B | CN | 2012 | 3560-1         | N/A  | KX693314 |
| B | CN | 2012 | 3581-1         | N/A  | KX693322 |
| B | CN | 2012 | 3596-1         | N/A  | KX693338 |
| B | CN | 2012 | 3617-1         | N/A  | KX693357 |
| B | CN | 2012 | 3624-10        | N/A  | KX693366 |
| B | CN | 2012 | 3627-1         | N/A  | KX693387 |
| B | CN | 2012 | 3786-012C      | N/A  | KX693393 |
| B | CN | 2012 | 3796-1         | N/A  | KX693415 |
| B | CN | 2012 | 3832-1         | N/A  | KX693430 |
| B | CN | 2012 | 3841-10        | N/A  | KX693454 |
| B | CN | 2012 | 3856-1         | N/A  | KX693468 |
| B | CN | 2012 | 3858-11        | N/A  | KX693475 |
| B | CN | 2012 | 3879-2         | N/A  | KX693489 |
| B | CN | 2012 | 3899-2         | N/A  | KX693491 |
| B | CN | 2012 | 3954-0-1       | N/A  | KX693496 |
| B | CN | 2012 | 543-0-1        | N/A  | KX693515 |
| B | CN | 2012 | 555-0-1        | N/A  | KX693533 |
| B | CN | -    | B06            | N/A  | EU363830 |
| B | CN | -    | RL42           | PWID | U71182   |
| B | HK | 2006 | HK002          | N/A  | FJ460499 |
| B | HK | 2006 | HK003          | N/A  | FJ460500 |
| B | HK | 2006 | HK004          | N/A  | FJ460501 |
| B | IN | 2007 | NARI-L5_NEM.J3 | N/A  | FJ515874 |
| B | IN | -    | 11807          | N/A  | EF694037 |
| B | JP | 1988 | 2              | NO   | AB588196 |
| B | JP | 1988 | 3              | NO   | AB588207 |
| B | JP | 1989 | 31             | MSM  | AB588209 |
| B | JP | 1989 | 33             | SH   | AB588211 |
| B | JP | 1989 | 40             | NO   | AB588223 |
| B | JP | 1989 | 60             | MSM  | AB588232 |
| B | JP | 1998 | DR1120         | N/A  | AB480698 |
| B | JP | 1999 | DR1348         | N/A  | AB287369 |
| B | JP | 2000 | DR2508         | N/A  | AB289587 |
| B | JP | 2000 | 117            | N/A  | AB428551 |
| B | JP | 2001 | DR388          | N/A  | AB289589 |
| B | JP | 2001 | 134            | N/A  | AB428552 |
| B | JP | 2002 | 194            | N/A  | AB428553 |
| B | JP | 2002 | 197            | N/A  | AB428554 |



|   |    |      |                           |     |          |
|---|----|------|---------------------------|-----|----------|
| B | JP | 2003 | 227                       | N/A | AB428555 |
| B | JP | 2003 | 285                       | N/A | AB428558 |
| B | JP | 2004 | 04JPDR6075B               | N/A | AB221125 |
| B | JP | 2004 | DR6089                    | N/A | AB286955 |
| B | JP | 2004 | 329                       | N/A | AB428559 |
| B | JP | 2004 | DR6174                    | N/A | AB480692 |
| B | JP | 2004 | DR6175                    | N/A | AB480694 |
| B | JP | 2004 | DR5913                    | N/A | AB480696 |
| B | JP | 2005 | DR6538                    | N/A | AB287363 |
| B | JP | 2005 | DR6737                    | N/A | AB287364 |
| B | JP | 2005 | DR7060                    | MSM | AB287366 |
| B | JP | 2005 | DR7065                    | N/A | AB287368 |
| B | JP | 2005 | 426                       | N/A | AB428556 |
| B | JP | 2005 | 436                       | N/A | AB428557 |
| B | JP | 2005 | 398                       | N/A | AB428560 |
| B | JP | 2005 | DR6657                    | MSM | AB588243 |
| B | JP | 2005 | DR6739                    | SH  | AB588253 |
| B | JP | 2005 | DR6826                    | MSM | AB588263 |
| B | JP | 2005 | DR6871                    | MSM | AB588271 |
| B | JP | 2005 | DR6946                    | SH  | AB588283 |
| B | JP | 2005 | DR7015                    | SH  | AB588291 |
| B | JP | 2006 | 472                       | N/A | AB428561 |
| B | JP | 2006 | 574                       | N/A | AB428562 |
| B | JP | 2006 | DR7259                    | SH  | AB588311 |
| B | JP | 2006 | DR7374                    | MSM | AB588329 |
| B | JP | 2008 | NMC104 clone 01           | N/A | AB731663 |
| B | JP | 2009 | NMC851A clone 14          | N/A | AB731665 |
| B | JP | 2009 | NMC127 clone 07           | N/A | AB731667 |
| B | JP | 2011 | DEMB11JP002               | N/A | KF716497 |
| B | JP | 2012 | DEMB12JP001               | N/A | KF716498 |
| B | JP | -    | MOKW9C                    | SH  | AB262952 |
| B | JP | -    | DR1673                    | N/A | AB564744 |
| B | JP | -    | DR2735                    | N/A | AB564746 |
| B | JP | -    | pJPDR0796B02              | N/A | AB565478 |
| B | JP | -    | JRC03B                    | N/A | AB565495 |
| B | JP | -    | JRC05B                    | N/A | AB565497 |
| B | JP | -    | JRC53B                    | N/A | AB565499 |
| B | JP | -    | JRC65B                    | N/A | AB565501 |
| B | JP | -    | DR1712                    | N/A | AB604946 |
| B | JP | -    | DR1777                    | N/A | AB604948 |
| B | JP | -    | DR5929                    | N/A | AB604950 |
| B | JP | -    | pJRC57B09                 | N/A | AB641836 |
| B | JP | -    | KP 5 48 A02               | N/A | AB742145 |
| B | JP | -    | ETR                       | EX  | D12582   |
| B | JP | -    | KKwt 12                   | N/A | KT961002 |
| B | KR | 1991 | 91LCS9-15330 15319        | N/A | KX960965 |
| B | KR | 1991 | 91KYB12-15320 15293 15314 | N/A | KX960966 |
| B | KR | 1991 | 91LGI11-15285 15339 15331 | N/A | KX960967 |
| B | KR | 1991 | 91PJB12-15284 15329 15280 | N/A | KX960973 |
| B | KR | 1992 | KR2057 C1                 | SG  | AJ417423 |
| B | KR | 1992 | HP-1 92LYS9-4500          | PH  | KJ140245 |
| B | KR | 1992 | HP-2 97JJW2-12101         | PH  | KJ140247 |
| B | KR | 1992 | HP-3 02LJW8-4757          | PH  | KJ140248 |
| B | KR | 1992 | HP-6 03JHJ2-3477          | PH  | KJ140251 |
| B | KR | 1992 | HP-7 96LSM10-3474         | PH  | KJ140252 |
| B | KR | 1992 | HP-10 02SHJ8-6986         | PH  | KJ140255 |
| B | KR | 1992 | HP-11 02PGU10-4780        | PH  | KJ140256 |
| B | KR | 1992 | HP-12 02LGH10-3448        | PH  | KJ140257 |
| B | KR | 1992 | HP-14 97KTG8-3466         | PH  | KJ140259 |
| B | KR | 1992 | HP-16 12JIS11-6075        | PH  | KJ140261 |
| B | KR | 1992 | 93LSW7-10899              | PH  | KJ140266 |
| B | KR | 1992 | 94KHB5-3295               | N/A | KJ140267 |
| B | KR | 1992 | 92KYJ5-13316              | SH  | KU869580 |
| B | KR | 1992 | 92YWS6-13327 13320        | SG  | KU869584 |
| B | KR | 1992 | 92HSH6-13313              | SG  | KU869589 |
| B | KR | 1992 | 92PJA12-13306             | SG  | KU869595 |

|   |    |      |                             |     |          |
|---|----|------|-----------------------------|-----|----------|
| B | KR | 1992 | 92DGi6-13344                | N/A | KU869604 |
| B | KR | 1992 | 92PTH3-13342                | N/A | KU869607 |
| B | KR | 1992 | 92KSS12-13399               | SG  | KU896115 |
| B | KR | 1992 | 92JSH3-13355                | N/A | KU896116 |
| B | KR | 1992 | 92CYK6-13395                | SG  | KU896118 |
| B | KR | 1992 | 92JYO12-13400               | N/A | KU896119 |
| B | KR | 1992 | Donor-R-92CIS6-13392        | SG  | KU896125 |
| B | KR | 1992 | 92KChS3-15180 15181         | N/A | KX702368 |
| B | KR | 1992 | 92HSW8-14918 15297 14911    | N/A | KX960963 |
| B | KR | 1992 | 92OCH3-13375 15333 14915    | SG  | KX960964 |
| B | KR | 1992 | 92HJH1-15292 15294 15318    | N/A | KX960968 |
| B | KR | 1992 | 92PGJ4-15289 15291 15312    | N/A | KX960969 |
| B | KR | 1992 | 92KYS7-15322                | SG  | KX960970 |
| B | KR | 1992 | 92SJCL8-15336               | N/A | KX960971 |
| B | KR | 1993 | KRA812 C1                   | SH  | AJ417420 |
| B | KR | 1993 | 93JHS5 HP18                 | PH  | KF561443 |
| B | KR | 1993 | HP-17 02LSP11-2268          | PH  | KJ140262 |
| B | KR | 1993 | Donor-P-93KPS10-13295 13289 | SG  | KU869532 |
| B | KR | 1993 | 93BJR3-13326 13318          | N/A | KU869582 |
| B | KR | 1993 | 93AJE5-13319                | N/A | KU869583 |
| B | KR | 1993 | 93BGO2-13323 13321          | N/A | KU869585 |
| B | KR | 1993 | 93LSY2-13324 13322          | N/A | KU869586 |
| B | KR | 1993 | 93GHS5-13309                | N/A | KU869597 |
| B | KR | 1993 | 93HCS2-13370 13353          | N/A | KU896101 |
| B | KR | 1993 | 93YEH1-13398                | N/A | KU896108 |
| B | KR | 1993 | 93JIJ6-13358                | SH  | KU896123 |
| B | KR | 1993 | 93KJK4-13359                | SG  | KU896124 |
| B | KR | 1993 | 93PCKy3-15236               | N/A | KX960972 |
| B | KR | 1994 | 93KDG4-14929 14927 15325    | N/A | KX960962 |
| B | KR | 1995 | KR5076 K1X                  | SH  | AJ417414 |
| B | KR | 1995 | KR5086 C1                   | SH  | AJ417429 |
| B | KR | 1995 | HP-5 95PJH6-10862           | PH  | KJ140250 |
| B | KR | 1995 | 95KJHw4-15335               | N/A | KX960974 |
| B | KR | 1996 | KR3042 K5                   | SG  | AJ417408 |
| B | KR | 1996 | KR5058 K1                   | SH  | AJ417411 |
| B | KR | 1996 | KR6035 K1                   | SG  | AJ417417 |
| B | KR | 1996 | KR3026 C1                   | SH  | AJ417426 |
| B | KR | 1997 | WK                          | SH  | AF224507 |
| B | KR | 1999 | 99HYH2                      | SH  | JQ316129 |
| B | KR | 2000 | 00LJI12-13346               | SG  | KU869602 |
| B | KR | 2002 | 02OSG1                      | SG  | JQ429433 |
| B | KR | 2002 | HP-4 02KGJ10-4782           | PH  | KJ140249 |
| B | KR | 2002 | HP-19 02LGS11-3443          | PH  | KJ140264 |
| B | KR | 2002 | HP-20 02KJO10-3480          | PH  | KJ140265 |
| B | KR | 2003 | 03CWS10 1432 HP 8           | PH  | DQ339425 |
| B | KR | 2003 | 03LSH1                      | SH  | JQ316127 |
| B | KR | 2003 | 03KDE11                     | PH  | JQ316128 |
| B | KR | 2003 | 03HJY8                      | PB  | JQ316131 |
| B | KR | 2003 | 03KGS5                      | PB  | JQ316132 |
| B | KR | 2003 | 03YGS3                      | N/A | JQ316135 |
| B | KR | 2003 | HP-15 03LSW3 6491           | PH  | KJ140260 |
| B | KR | 2004 | 04LHS6                      | N/A | AY839827 |
| B | KR | 2004 | 04LSK7                      | SG  | DQ295192 |
| B | KR | 2004 | 04KMH5                      | SH  | DQ295193 |
| B | KR | 2004 | 04KJin8 1955                | SH  | DQ295195 |
| B | KR | 2004 | 04KYR8                      | SG  | DQ295196 |
| B | KR | 2004 | 04KMK5                      | PH  | JQ316126 |
| B | KR | 2004 | 04KJS8                      | SB  | JQ316130 |
| B | KR | 2005 | 05CSR3                      | PH  | DQ837381 |
| B | KR | 2005 | 05YJN2                      | SG  | JQ316134 |
| B | KR | 2007 | 07KYY4                      | SG  | JQ341411 |
| B | KR | 2009 | KOR HIV Env-1               | MSM | KT878021 |
| B | KR | 2009 | KOR HIV Env-2               | SH  | KT878022 |
| B | KR | 2009 | KOR HIV Env-3               | SH  | KT878023 |
| B | KR | 2009 | KOR HIV Env-4               | SH  | KT878024 |
| B | KR | 2009 | KOR HIV Env-5               | MSM | KT878025 |

|   |    |      |                |     |          |
|---|----|------|----------------|-----|----------|
| B | KR | 2009 | KOR HIV Env-6  | MSM | KT878026 |
| B | KR | 2009 | KOR HIV Env-7  | SH  | KT878027 |
| B | KR | 2009 | KOR HIV Env-8  | SH  | KT878028 |
| B | KR | 2009 | KOR HIV Env-9  | SH  | KT878029 |
| B | KR | 2009 | KOR HIV Env-10 | MSM | KT878030 |
| B | KR | 2009 | KOR HIV Env-11 | SH  | KT878031 |
| B | KR | 2009 | KOR HIV Env-12 | SH  | KT878032 |
| B | KR | 2009 | KOR HIV Env-13 | MSM | KT878033 |
| B | KR | 2009 | KOR HIV Env-14 | N/A | KT878034 |
| B | KR | 2009 | KOR HIV Env-15 | MSM | KT878035 |
| B | KR | 2009 | KOR HIV Env-16 | N/A | KT878036 |
| B | KR | 2009 | KOR HIV Env-17 | MSM | KT878037 |
| B | KR | 2009 | KOR HIV Env-18 | MSM | KT878038 |
| B | KR | 2009 | KOR HIV Env-19 | N/A | KT878039 |
| B | KR | 2009 | KOR HIV Env-20 | SH  | KT878040 |
| B | MM | 1999 | mSTD101        | SG  | AB097870 |
| B | SG | 2008 | HM039          | N/A | KY213740 |
| B | SG | 2008 | HM024          | N/A | KY213741 |
| B | SG | 2008 | HM027          | N/A | KY213742 |
| B | SG | 2008 | HM080          | N/A | KY213743 |
| B | SG | 2008 | HM053          | N/A | KY213746 |
| B | SG | 2008 | HM075          | N/A | KY213747 |
| B | SG | 2008 | HM106          | N/A | KY213751 |
| B | SG | 2009 | HM151          | N/A | KY213744 |
| B | SG | 2009 | HM141          | N/A | KY213745 |
| B | SG | 2009 | HM122          | N/A | KY213748 |
| B | TH | 1990 | BK132          | N/A | AY173951 |
| B | TH | 1996 | 96TH NP1538    | N/A | AY713408 |
| B | TH | 1996 | M140           | SH  | DQ354112 |
| B | TH | 1996 | M041           | SH  | DQ354114 |
| B | TH | 1996 | M081           | SH  | DQ354116 |
| B | TH | 1996 | M145           | SH  | DQ354118 |
| B | TH | 1996 | M149           | SH  | DQ354119 |
| B | TH | 1999 | 99TH C1416     | N/A | AY945711 |
| B | TH | 2000 | 00TH C3198     | N/A | AY945710 |
| B | TH | 2000 | 3045A06.A2     | N/A | KJ952535 |
| B | TH | 2004 | 04TH317223     | N/A | JN248321 |
| B | TH | 2004 | 04TH601066     | N/A | JN248329 |
| B | TH | 2004 | 04TH803686     | N/A | JN248333 |
| B | TH | 2004 | 04TH808998     | N/A | JN248335 |
| B | TH | 2004 | 04TH821921     | N/A | JN248337 |
| B | TH | 2005 | T286588_sga01  | N/A | JF297222 |
| B | TH | 2005 | 05TH355614     | N/A | JN248343 |
| B | TH | 2005 | 05TH356764     | N/A | JN248344 |
| B | TH | 2005 | 05TH356883     | N/A | JN248345 |
| B | TH | 2005 | 05TH357801     | N/A | JN248346 |
| B | TH | 2005 | 05TH429730     | N/A | JN248347 |
| B | TH | 2005 | 05TH440248     | N/A | JN248348 |
| B | TH | 2005 | 05TH645189     | N/A | JN248353 |
| B | TH | 2005 | 05TH736580     | N/A | JN248354 |
| B | TH | 2005 | T286588_01     | N/A | KC749001 |
| B | TH | 2006 | AA010a_WG1     | N/A | JX446795 |
| B | TH | 2006 | AA011a09R      | N/A | JX446817 |
| B | TH | 2006 | AA093a_RH1     | N/A | JX447795 |
| B | TH | 2006 | NPBQC          | N/A | KJ769147 |
| B | TH | 2007 | 402288_c01     | N/A | JQ352781 |
| B | TH | 2007 | AA040a_WG11    | N/A | JX447156 |
| B | TH | 2008 | T503963_sga03  | N/A | JF297229 |
| B | TH | 2008 | MERLBDTRC10    | N/A | JN860769 |
| B | TH | 2008 | AA115c05R      | N/A | JX448101 |
| B | TH | 2008 | T503963_01     | N/A | KC749033 |
| B | TH | 2010 | DEMB10TH002    | MSM | KP109514 |
| B | TH | 2010 | 40353v04_01R   | N/A | KU230423 |
| B | TH | -    | NKR_0512_8     | N/A | HM215431 |
| B | TH | -    | RPW_0510_2     | N/A | HM215435 |
| B | TW | 1994 | TWCYS LM49     | MB  | AF086817 |

|    |    |      |                |      |          |
|----|----|------|----------------|------|----------|
| BC | CN | 1996 | YNRL9613       | PWID | AY967803 |
| BC | CN | 1996 | YNRL9607       | PWID | AY967804 |
| BC | CN | 1996 | YNRL9618       | PWID | AY967807 |
| BC | CN | 1996 | YN3018         | PWID | KF250378 |
| BC | CN | 1996 | YN4007         | PWID | KF250379 |
| BC | CN | 1996 | YN4018         | PWID | KF250380 |
| BC | CN | 1998 | YNRL9828       | PWID | AY967805 |
| BC | CN | 2003 | BC03           | PWID | EU363833 |
| BC | CN | 2003 | BC09           | SU   | EU363839 |
| BC | CN | 2003 | BC15           | SU   | EU363845 |
| BC | CN | 2004 | CH038          | PWID | EF042692 |
| BC | CN | 2005 | BC11           | PWID | EU363841 |
| BC | CN | 2005 | 05YNRL08sg     | PWID | KC898976 |
| BC | CN | 2005 | 05YNRL09sg     | PWID | KC898977 |
| BC | CN | 2005 | 05YNRL20sg     | PWID | KC898978 |
| BC | CN | 2005 | 05YNRL17sg     | PWID | KC899006 |
| BC | CN | 2006 | BC08           | PWID | EU363838 |
| BC | CN | 2006 | CNE87 U        | N/A  | HQ700003 |
| BC | CN | 2006 | 06YNRL106sg    | PWID | KC898981 |
| BC | CN | 2007 | BC04           | PWID | EU363834 |
| BC | CN | 2007 | BC05           | PWID | EU363835 |
| BC | CN | 2007 | CNE15          | PWID | HM215401 |
| BC | CN | 2007 | CNE16          | PWID | HM215402 |
| BC | CN | 2007 | CNE18          | PWID | HM215404 |
| BC | CN | 2007 | CNE40          | PWID | HM215414 |
| BC | CN | 2007 | CNE67          | PWID | HM215425 |
| BC | CN | 2007 | 309            | SH   | HM776938 |
| BC | CN | 2007 | 07YNLC08sg     | PWID | KC898982 |
| BC | CN | 2007 | 07YNLC18sg     | PWID | KC898983 |
| BC | CN | 2007 | 07YNLC22sg     | PWID | KC899007 |
| BC | CN | 2007 | cq070084       | N/A  | KF250381 |
| BC | CN | 2007 | gd070112       | N/A  | KF250382 |
| BC | CN | 2007 | gx070056       | N/A  | KF250383 |
| BC | CN | 2007 | jx070017       | N/A  | KF250384 |
| BC | CN | 2007 | 07CNYN335      | SU   | KF835521 |
| BC | CN | 2007 | 07CNYN338      | PWID | KF835524 |
| BC | CN | 2007 | 07CNYN339      | PWID | KF835525 |
| BC | CN | 2007 | 07CNYN340      | PWID | KF835526 |
| BC | CN | 2007 | 07CNYN360      | PWID | KF835539 |
| BC | CN | 2007 | 07CNYN361      | PWID | KF835540 |
| BC | CN | 2007 | 07CNYN367      | PWID | KF835544 |
| BC | CN | 2008 | 08YN065        | SH   | GU362013 |
| BC | CN | 2009 | 09YNLC10sg     | PWID | KC898984 |
| BC | CN | 2009 | 09YNLC216002sg | PWID | KC898985 |
| BC | CN | 2009 | 09YNLC216027sg | PWID | KC898986 |
| BC | CN | 2009 | 09YNLC216031sg | PWID | KC898987 |
| BC | CN | 2009 | 09YNLC216036sg | PWID | KC898988 |
| BC | CN | 2009 | 09YNLC492sg    | PWID | KC898989 |
| BC | CN | 2009 | 09YNLC494sg    | PWID | KC898990 |
| BC | CN | 2009 | 09YNLC496sg    | PWID | KC898991 |
| BC | CN | 2009 | 09YNLC499sg    | PWID | KC898993 |
| BC | CN | 2009 | 09YNYJ217036sg | PWID | KC899003 |
| BC | CN | 2009 | 09YNRL215025sg | PWID | KC899010 |
| BC | CN | 2009 | 09YNYJ217010sg | PWID | KC899013 |
| BC | CN | 2009 | 09YNYJ217016sg | PWID | KC899014 |
| BC | CN | 2009 | 09YNYJ479sg    | PWID | KC899015 |
| BC | CN | 2010 | JL100091       | SH   | KF011493 |
| BC | CN | 2010 | DH04           | SH   | KF250397 |
| BC | CN | 2010 | DH15           | SH   | KF250399 |
| BC | CN | 2012 | DH23           | MSM  | KF250405 |
| BC | CN | 2012 | DH24           | SH   | KF250406 |
| BC | CN | 2012 | DH33           | SH   | KF250409 |
| BC | CN | 2012 | DH36           | SH   | KF250410 |
| BC | CN | 2014 | 12YN10192      | PWID | KT960983 |
| BC | CN | 2014 | XC2014EU20     | SH   | KU886698 |
| BC | CN | -    | CHN19 CN19     | N/A  | AF268277 |

|      |    |      |                 |      |          |
|------|----|------|-----------------|------|----------|
| BC   | CN | -    | BC13            | PWID | EU363843 |
| BC   | IN | 1999 | NARI10-1        | N/A  | EU000515 |
| BC   | IN | 2002 | NARI9-1         | N/A  | EU000506 |
| BC   | IN | 2002 | NARI7-1         | N/A  | EU000509 |
| BC   | IN | 2002 | INDNARI 0218440 | N/A  | EU000512 |
| BC   | IN | 2008 | Man 40          | PWID | HM573466 |
| BC   | IN | 2008 | MAN 146         | PWID | HM598635 |
| BC   | MM | 1999 | mIDU106         | PWID | AB097869 |
| BC   | MM | 1999 | mIDU103         | PWID | AB097873 |
| BC   | MM | 2014 | mKSDU81         | PWID | KU820850 |
| BC   | MM | 2014 | mKSDU92         | PWID | KU820851 |
| BC   | MM | 2014 | fKSDU97         | PWID | KU820852 |
| BF1  | JP | 2004 | DR6082          | N/A  | AB480298 |
| BF1  | JP | 2004 | DR6190          | N/A  | AB480300 |
| BF1  | JP | -    | DR0769          | N/A  | AB253430 |
| BF1G | MO | 2005 | MO108           | PWID | GU207884 |
| C    | CN | 1998 | YNRL9840        | PWID | AY967806 |
| C    | CN | 2006 | CNE58           | PWID | HM215421 |
| C    | CN | 2006 | CNE86 U         | N/A  | HQ699991 |
| C    | CN | 2006 | CNE88 U         | N/A  | HQ699992 |
| C    | CN | 2006 | 06YNLC028sg     | PWID | KC898980 |
| C    | CN | 2006 | 06YNLC32sg      | PWID | KC899004 |
| C    | CN | 2007 | CNE17           | PWID | HM215403 |
| C    | CN | 2007 | CNE23           | PWID | HM215408 |
| C    | CN | 2007 | CNE30           | PWID | HM215411 |
| C    | CN | 2007 | CNE2            | N/A  | HQ699950 |
| C    | CN | 2007 | CNE65           | PWID | HQ699980 |
| C    | CN | 2007 | CNE66           | PWID | HQ699981 |
| C    | CN | 2007 | CNE106          | N/A  | HQ699985 |
| C    | CN | 2007 | CNE103 U        | N/A  | HQ699999 |
| C    | CN | 2007 | 07CNYN328       | N/A  | KF835515 |
| C    | CN | 2007 | 07CNYN336       | PWID | KF835522 |
| C    | CN | 2009 | 09YNLX090sg     | PWID | KC898995 |
| C    | CN | 2009 | 09YNLX133sg     | PWID | KC898996 |
| C    | CN | 2009 | 09YNLC216005sg  | PWID | KC899005 |
| C    | CN | 2009 | DH21            | N/A  | KF250403 |
| C    | CN | 2009 | DH22            | SH   | KF250404 |
| C    | CN | 2010 | CNGX752 R1      | N/A  | KC807912 |
| C    | CN | 2010 | CNGX757 R1      | N/A  | KC807924 |
| C    | CN | 2010 | CNXJ0651 R1     | N/A  | KC807932 |
| C    | CN | 2010 | CNXJ1081 R1     | N/A  | KC807943 |
| C    | CN | 2010 | CNXJ09466 R2    | N/A  | KC807954 |
| C    | CN | 2010 | CNXJ0031 R1     | N/A  | KC807957 |
| C    | CN | 2010 | CNXJ09277 R1    | N/A  | KC807969 |
| C    | CN | 2010 | CNXJ1271 R6     | N/A  | KC807981 |
| C    | CN | 2010 | YNFL19          | SH   | KC870038 |
| C    | CN | -    | GX C 14         | N/A  | AY217546 |
| C    | IN | 1993 | 93IN101         | N/A  | AB023804 |
| C    | IN | 1993 | 93IN999         | SG   | AF067154 |
| C    | IN | 1993 | 93IN904         | PB   | AF067157 |
| C    | IN | 1993 | 93IN905         | PB   | AF067158 |
| C    | IN | 1994 | 94IN11246       | SH   | AF067159 |
| C    | IN | 1994 | 94IN476         | N/A  | AF286223 |
| C    | IN | 1994 | 94IN 20635 4    | N/A  | AY713414 |
| C    | IN | 1995 | 95IN21068       | SH   | AF067155 |
| C    | IN | 1998 | 98IN012         | N/A  | AF286231 |
| C    | IN | 1998 | 98IN022         | N/A  | AF286232 |
| C    | IN | 1999 | 01IN565 10      | PB   | AY049708 |
| C    | IN | 1999 | HIV 16055 2     | SH   | EF117268 |
| C    | IN | 1999 | HIV 16845 2     | SH   | EF117269 |
| C    | IN | 1999 | HIV 16936 2     | SH   | EF117270 |
| C    | IN | 1999 | HIV 25710 2     | SH   | EF117271 |
| C    | IN | 1999 | HIV 25711 2     | SH   | EF117272 |
| C    | IN | 1999 | HIV 25925 2     | SH   | EF117273 |
| C    | IN | 2000 | HIV 00836 2     | SH   | EF117265 |
| C    | IN | 2000 | HIV 001428 2    | SH   | EF117266 |

|   |    |      |                   |      |          |
|---|----|------|-------------------|------|----------|
| C | IN | 2000 | HIV 0013095 2     | SH   | EF117267 |
| C | IN | 2000 | HIV 26191 2       | SH   | EF117274 |
| C | IN | 2000 | NARI VB105 J10    | SH   | EU521729 |
| C | IN | 2003 | D24               | N/A  | EF469243 |
| C | IN | 2004 | C.IN.04.NIRT379.1 | N/A  | KF766537 |
| C | IN | 2005 | C.IN.05.NIRT333.1 | N/A  | KF766540 |
| C | IN | 2005 | C.IN.05.NIRT723.1 | N/A  | KF766541 |
| C | IN | 2007 | NARI VB52 J19     | SH   | EU521727 |
| C | IN | 2007 | NARI IVC4 NEM J2  | SH   | EU908218 |
| C | IN | 2009 | T125 p1           | SH   | JF680935 |
| C | IN | 2011 | NIRT009           | N/A  | KX069227 |
| C | IN | 2011 | NIRT010           | N/A  | KX069228 |
| C | IN | 2013 | NIRT ENV003       | MB   | KX756602 |
| C | IN | 2013 | NIRT ENV011       | MB   | KX756610 |
| C | IN | 2013 | NIRT ENV012       | MB   | KX756611 |
| C | IN | 2013 | NIRT ENV013       | MB   | KX756612 |
| C | IN | 2013 | NIRT ENV014       | MB   | KX756613 |
| C | IN | 2013 | NIRT ENV015       | MB   | KX756614 |
| C | IN | 2013 | NIRT ENV017       | MB   | KX756615 |
| C | IN | 2014 | NIRT004           | N/A  | KX069222 |
| C | IN | 2014 | NIRT ENV001       | MB   | KX756600 |
| C | IN | 2014 | NIRT ENV002       | MB   | KX756601 |
| C | IN | 2014 | NIRT ENV004       | MB   | KX756603 |
| C | IN | 2014 | NIRT ENV005       | MB   | KX756604 |
| C | IN | 2014 | NIRT ENV006       | MB   | KX756605 |
| C | IN | 2014 | NIRT ENV007       | MB   | KX756606 |
| C | IN | 2014 | NIRT ENV008       | MB   | KX756607 |
| C | IN | 2014 | NIRT ENV009       | MB   | KX756608 |
| C | IN | 2014 | NIRT ENV010       | MB   | KX756609 |
| C | IN | 2015 | NIRT001           | N/A  | KX069219 |
| C | IN | 2015 | NIRT002           | N/A  | KX069220 |
| C | IN | 2015 | NIRT003           | N/A  | KX069221 |
| C | IN | 2015 | NIRT005           | N/A  | KX069223 |
| C | IN | 2015 | NIRT006           | N/A  | KX069224 |
| C | IN | 2015 | NIRT007           | N/A  | KX069225 |
| C | IN | 2015 | NIRT008           | N/A  | KX069226 |
| C | IN | -    | CALCMANDAL        | N/A  | AJ276221 |
| C | IN | -    | cal308F           | SW   | DQ404010 |
| C | IN | -    | VB39              | N/A  | EF694032 |
| C | IN | -    | VB49              | N/A  | EF694034 |
| C | IN | -    | NARI VB96 J21     | N/A  | EU521728 |
| C | MM | 1999 | mIDU101 3         | PWID | AB097871 |
| C | NP | 2011 | 11NP003           | SH   | KJ158421 |
| C | NP | 2011 | 11NP007           | PWID | KJ158423 |
| C | NP | 2011 | 11NP008           | MB   | KJ158424 |
| C | NP | 2011 | 11NP010           | SH   | KJ158425 |
| C | NP | 2011 | 11NP014           | SH   | KJ158426 |
| C | NP | 2011 | 11NP028           | SH   | KJ158428 |
| C | NP | 2011 | 11NP041           | PWID | KJ158430 |
| C | NP | 2011 | 11NP046           | PWID | KJ158431 |
| C | NP | 2011 | 11NP065           | SH   | KJ158432 |
| C | NP | 2011 | 11NP068           | PWID | KJ158433 |
| C | NP | 2011 | 11NP069           | MB   | KJ158434 |
| C | NP | 2011 | 11NP080           | SH   | KJ158435 |
| C | NP | 2011 | 11NP092           | MSM  | KJ158438 |
| C | NP | 2011 | 11NP093           | SH   | KJ158439 |
| C | NP | 2011 | 11NP102           | SH   | KJ158440 |
| C | NP | 2011 | 11NP015           | SH   | KJ541837 |
| C | NP | 2011 | 11NP071           | PWID | KJ541839 |
| C | NP | 2011 | 11NP074           | SH   | KJ541840 |
| C | NP | 2011 | 11NP075           | SH   | KJ541841 |
| C | NP | 2011 | 11NP082           | SH   | KJ541844 |
| C | NP | 2011 | 11NP095           | SH   | KJ541846 |
| C | NP | 2011 | 11NP103           | SH   | KJ541847 |
| C | NP | 2011 | 11NP104           | SH   | KJ541848 |
| C | NP | 2011 | 11NP107           | SH   | KJ541849 |

|    |    |      |              |     |          |
|----|----|------|--------------|-----|----------|
| C  | PK | 2014 | DEMC14PK009  | SH  | KU749412 |
| C  | PK | 2014 | PK010        | MSM | KX232603 |
| C  | TH | -    | PWJ 0513 39  | N/A | HM215433 |
| CD | NP | 2011 | 11NP035      | MB  | KJ158429 |
| CD | NP | 2011 | 11NP079      | SH  | KJ541843 |
| CU | JP | 2004 | DR5782       | N/A | AB286849 |
| D  | KR | 2004 | 04KBH8       | SG  | DQ054367 |
| G  | CN | 2006 | sh52         | N/A | HM067749 |
| G  | CN | 2008 | GX 2084 08   | N/A | JN106043 |
| -  | CN | 2014 | YN10134      | SH  | KY406739 |
| -  | JP | 1986 | JH32         | PH  | M21138   |
| -  | PH | 2015 | DE00115PH012 | SG  | KY658688 |
| -  | PH | 2015 | DEMB15PH002  | SG  | KY658689 |
| -  | PH | 2015 | DEMB15PH003  | SG  | KY658690 |
| -  | PH | 2015 | DEURF15PH005 | SG  | KY658691 |
| -  | PH | 2015 | DEURF15PH001 | SG  | KY658692 |
| -  | TH | 1992 | TH921104     | SH  | U39255   |
| -  | TH | 1993 | 93TH067      | N/A | U39258   |

Guide to abbreviations:

| Country |             |
|---------|-------------|
| CN      | China       |
| HK      | Hong Kong   |
| ID      | Indonesia   |
| IN      | India       |
| JP      | Japan       |
| KH      | Cambodia    |
| KR      | South Korea |
| MM      | Myanmar     |
| MO      | Macau       |
| MY      | Malaysia    |
| NP      | Nepal       |
| PH      | Philippines |
| PK      | Pakistan    |
| SG      | Singapore   |
| TH      | Thailand    |
| TW      | Taiwan      |
| VN      | Vietnam     |

| Risk Factor |                                   |
|-------------|-----------------------------------|
| EX          | Experimental                      |
| MB          | Mother to child                   |
| MSM         | Men who have sex with men         |
| N/A         | Not recorded, unknown, other      |
| NO          | Nosocomial                        |
| PB          | Blood transfusion                 |
| PH          | Hemophilic                        |
| PWID        | People who inject drugs           |
| SB          | Bisexual                          |
| SG          | Homosexual                        |
| SH          | Heterosexual                      |
| SU          | Sexual transmission, unknown type |
| SW          | Sex worker                        |

**Table S3. Socio-demographic characteristics of SEARCH 010/RV254 participants**

|                                                    |                  |
|----------------------------------------------------|------------------|
| <b>Characteristics</b>                             |                  |
| <b>N</b>                                           | 303              |
| <b>Age</b>                                         |                  |
| Mean (SD)                                          | 28.0 (7.5)       |
| Median (IQR)                                       | 26 (23-31)       |
| Range                                              | 18-57            |
| <b>Gender</b>                                      |                  |
| Male (%)                                           | 291 (96.0%)      |
| Female (%)                                         | 12 (4.0%)        |
| <b>Days from first documented positive HIV RNA</b> |                  |
| Mean (SD)                                          | 2.34 (0.99)      |
| Median (IQR)                                       | 2 (2-3)          |
| Range                                              | 0-8              |
| <b>HIV RNA (log<sub>10</sub> copies/ml)</b>        |                  |
| Mean (SD)                                          | 5.78 (1.03)      |
| Median (IQR)                                       | 5.80 (5.23-6.69) |
| Range                                              | 2.78-7.85        |
| <b>CD4 T cells (cells/mm<sup>3</sup>)</b>          |                  |
| Mean (SD)                                          | 408.6 (188.7)    |
| Median (IQR)                                       | 381 (271-515)    |
| Range                                              | 7-1236           |
| <b>Occupation, n (%)</b>                           |                  |
| Private business/factory employee                  | 113 (37.3%)      |
| Student                                            | 73 (24.1%)       |
| Unemployed                                         | 31 (10.2%)       |
| Business owner                                     | 29 (9.6%)        |
| Government officer                                 | 22 (7.3%)        |
| Sex worker                                         | 10 (3.3%)        |
| Soldier/police                                     | 3 (1.0%)         |
| Agriculture                                        | 2 (0.7%)         |
| Taxi/Truck driver                                  | 2 (0.7%)         |
| Homemaker                                          | 1 (0.3%)         |
| Laborer                                            | 1 (0.3%)         |
| Other                                              | 16 (5.3%)        |
| <b>Number of sexual partners in the past month</b> |                  |
| Mean (SD)                                          | 2.3 (2.0)        |
| Median (IQR)                                       | 2 (1-3)          |
| Range                                              | 1-20             |
| <b>Risk factor</b>                                 |                  |
| Homosexual male (%)                                | 265 (87.5%)      |
| Bisexual male (%)                                  | 14 (4.6%)        |
| Heterosexual male (%)                              | 12 (4.0%)        |
| Heterosexual female (%)                            | 12 (4.0%)        |
| People who inject drugs (%)                        | 0 (0%)           |



**Table S4. RV254 Subtype B V3 loop tip motifs and their global frequencies**

| <b>Deduced V3 motif<br/>(HXB2 7158-7169)</b> | <b>Frequency of V3 motif in Subtype B<br/>Strains<br/>(LANL, n=122,265)</b> | <b>RV254 Participants with Subtype B Strains</b> |
|----------------------------------------------|-----------------------------------------------------------------------------|--------------------------------------------------|
| GPGR (Western B consensus)                   | 67.68%                                                                      | 2544072, 2545192, 2548411, 2549720               |
| APGR                                         | 4.06%                                                                       | 2544011, 2544829                                 |
| GPGG                                         | 3.04%                                                                       | 2547627                                          |
| APGQ                                         | 0.02%                                                                       | 2548419                                          |
| GPGQ (Thai B' consensus)                     | 1.31%                                                                       | None                                             |

**Table S5. Clusters identified in Asian HIV-1 transmission network**

| Cluster | Nodes | Country                         | Subtype             | Year                                            | Risk                              |
|---------|-------|---------------------------------|---------------------|-------------------------------------------------|-----------------------------------|
| 1       | 15    | VN (11), CN (4)                 | 01_AE (15)          | 1997 (5), 1998 (8), 1999 (1), N/A (1)           | N/A (12), PWID (2), NO (1)        |
| 2       | 14    | TH (10), JP (2), ID (1), VN (1) | 01_AE (14)          | 1990 (4), 1992 (2), 1993 (7), 1997 (1)          | SH (7), N/A (5), PWID (2)         |
| 3       | 12    | CN (12)                         | 07_BC (12)          | 2007 (7), 2008 (1), 2009 (1), N/A (3)           | MSM (9), N/A (3)                  |
| 4       | 10    | CN (10)                         | B (10)              | 2002 (3), 2003 (1), 2004 (1), 2012 (4), N/A (1) | N/A (7), NO (1), PWID (1), SH (1) |
| 5       | 7     | CN (7)                          | 07_BC (7)           | 1997 (1), 1998 (1), 2005 (1), 2006 (2), N/A (2) | PWID (5), N/A (2)                 |
| 6       | 6     | CN (6)                          | 01_AE (6)           | 2005 (2), 2007 (4)                              | MSM (4), N/A (2)                  |
| 7       | 6     | MM (6)                          | 83_cpx (6)          | 2013 (6)                                        | PWID (6)                          |
| 8       | 6     | CN (6)                          | 08_BC (5), C (1)    | 1997 (3), 1998 (1), 2007 (1), N/A (1)           | PWID (4), N/A (2)                 |
| 9       | 6     | TH (6)                          | 01_AE (6)           | 2009 (6)                                        | N/A (6)                           |
| 10      | 5     | CN (5)                          | 01_AE (5)           | 2008 (1), 2009 (2), 2010 (2)                    | MSM (5)                           |
| 11      | 5     | MM (5)                          | 82_cpx (5)          | 2013 (5)                                        | PWID (5)                          |
| 12      | 5     | JP (5)                          | B (5)               | 2003 (1), 2004 (1), 2005 (1), 2006 (2)          | N/A (5)                           |
| 13      | 5     | TH (5)                          | 01_AE (5)           | 1999 (3), 2000 (2)                              | PWID (5)                          |
| 14      | 4     | CN (4)                          | 08_BC (4)           | 2007 (4)                                        | N/A (4)                           |
| 15      | 4     | CN (4)                          | 08_BC (4)           | 2007 (4)                                        | N/A (2), PWID (2)                 |
| 16      | 4     | CN (4)                          | 08_BC (3), C (1)    | 2007 (4)                                        | N/A (3), PWID (1)                 |
| 17      | 3     | JP (3)                          | 01_AE (3)           | N/A (3)                                         | N/A (3)                           |
| 18      | 3     | CN (3)                          | 01_AE (3)           | 2007 (1), 2008 (1), 2010 (1)                    | MSM (2), SH (1)                   |
| 19      | 3     | CN (3)                          | 08_BC (3)           | 2007 (3)                                        | N/A (3)                           |
| 20      | 3     | CN (3)                          | 01_AE (3)           | 2002 (3)                                        | SH (3)                            |
| 21      | 3     | JP (3)                          | 69_01B (3)          | 2003 (1), 2004 (2)                              | MSM (3)                           |
| 22      | 3     | CN (3)                          | B (3)               | 2005 (1), 2006 (1), 2007 (1)                    | N/A (2), PWID (1)                 |
| 23      | 3     | CN (3)                          | 01_AE (3)           | 2010 (2), 2011 (1)                              | MSM (3)                           |
| 24      | 3     | CN (3)                          | BC (3)              | 1996 (3)                                        | PWID (3)                          |
| 25      | 3     | CN (3)                          | 01_AE (3)           | 2008 (1), 2009 (2)                              | MSM (3)                           |
| 26      | 3     | TH (3)                          | 01_AE (3)           | 2006 (3)                                        | N/A (3)                           |
| 27      | 3     | TH (3)                          | 01_AE (3)           | 1999 (1), N/A (2)                               | N/A (3)                           |
| 28      | 3     | CN (3)                          | 08_BC (3)           | 2007 (3)                                        | N/A (2), PWID (1)                 |
| 29      | 3     | CN (3)                          | 01_AE (3)           | 2007 (3)                                        | N/A (2), PWID (1)                 |
| 30      | 3     | CN (3)                          | 07_BC (3)           | 2007 (3)                                        | N/A (2), SH (1)                   |
| 31      | 3     | TH (3)                          | 01_AE (3)           | 2009 (3)                                        | N/A (3)                           |
| 32      | 3     | CN (3)                          | 55_01B (3)          | 2010 (1), 2011 (2)                              | MSM (3)                           |
| 33      | 3     | MM (3)                          | 83_cpx (3)          | 2013 (3)                                        | PWID (3)                          |
| 34      | 3     | KR (3)                          | B (3)               | 1992 (1), 1993 (1), 1995 (1)                    | N/A (3)                           |
| 35      | 3     | CN (3)                          | 01_AE (3)           | 2008 (1), 2009 (2)                              | MSM (3)                           |
| 36      | 3     | KR (3)                          | B (3)               | 1991 (1), 1992 (1), 1993 (1)                    | N/A (2), SH (1)                   |
| 37      | 2     | TH (2)                          | 01_AE (2)           | 2015 (2)                                        | MSM (2)                           |
| 38      | 2     | MY (1), SG (1)                  | 51_01B (2)          | 2009 (1), 2011 (1)                              | N/A (1), SG (1)                   |
| 39      | 2     | SG (2)                          | B (2)               | 2008 (1), 2009 (1)                              | N/A (2)                           |
| 40      | 2     | SG (2)                          | 01_AE (2)           | 2008 (2)                                        | N/A (2)                           |
| 41      | 2     | TH (2)                          | 01B (2)             | 2001 (1), 2002 (1)                              | PWID (2)                          |
| 42      | 2     | CN (2)                          | B (2)               | 2004 (2)                                        | N/A (2)                           |
| 43      | 2     | CN (2)                          | 08_BC (2)           | 2007 (2)                                        | N/A (1), PWID (1)                 |
| 44      | 2     | KR (2)                          | B (2)               | 1991 (1), 1992 (1)                              | N/A (2)                           |
| 45      | 2     | PK (2)                          | C (2)               | 2014 (2)                                        | MSM (1), SH (1)                   |
| 46      | 2     | CN (2)                          | 64_BC (2)           | 2009 (2)                                        | PWID (2)                          |
| 47      | 2     | TH (2)                          | 01_AE (2)           | 1993 (2)                                        | N/A (2)                           |
| 48      | 2     | CN (2)                          | 01_AE (2)           | 2007 (2)                                        | N/A (1), PWID (1)                 |
| 49      | 2     | TH (2)                          | 01_AE (2)           | 2006 (2)                                        | N/A (2)                           |
| 50      | 2     | KR (2)                          | B (2)               | 1992 (2)                                        | N/A (2)                           |
| 51      | 2     | TH (2)                          | 01_AE (2)           | 2010 (1), 2013 (1)                              | MSM (2)                           |
| 52      | 2     | CN (2)                          | 01B (2)             | 2013 (2)                                        | MSM (2)                           |
| 53      | 2     | PK (2)                          | A1 (2)              | 2014 (1), 2015 (1)                              | PWID (2)                          |
| 54      | 2     | CN (2)                          | BC (2)              | 1996 (2)                                        | PWID (2)                          |
| 55      | 2     | TH (2)                          | 01B (2)             | 2013 (1), 2015 (1)                              | MSM (2)                           |
| 56      | 2     | TH (2)                          | B (2)               | 2005 (2)                                        | N/A (2)                           |
| 57      | 2     | CN (2)                          | 01_AE (1), 0107 (1) | 2007 (2)                                        | MSM (1), SG (1)                   |
| 58      | 2     | TH (2)                          | 01_AE (2)           | 2005 (1), 2008 (1)                              | N/A (2)                           |
| 59      | 2     | TH (2)                          | 01_AE (2)           | 2004 (2)                                        | N/A (2)                           |
| 60      | 2     | TH (2)                          | 01_AE (2)           | 2006 (2)                                        | N/A (2)                           |

|     |   |        |                     |                    |                   |
|-----|---|--------|---------------------|--------------------|-------------------|
| 61  | 2 | CN (2) | BC (2)              | 2009 (2)           | PWID (2)          |
| 62  | 2 | CN (2) | 65 cpx (2)          | 2009 (1), 2010 (1) | SH (2)            |
| 63  | 2 | JP (2) | B (2)               | 2002 (2)           | N/A (2)           |
| 64  | 2 | CN (2) | 01 AE (2)           | 2002 (2)           | PWID (1), SH (1)  |
| 65  | 2 | JP (2) | B (2)               | N/A (2)            | N/A (2)           |
| 66  | 2 | TH (2) | B (2)               | 2005 (2)           | N/A (2)           |
| 67  | 2 | TH (2) | 01 AE (2)           | 2009 (1), 2010 (1) | MSM (2)           |
| 68  | 2 | TH (2) | 01 AE (2)           | 2000 (2)           | N/A (2)           |
| 69  | 2 | CN (2) | 01 AE (2)           | 2005 (2)           | SH (2)            |
| 70  | 2 | KR (2) | B (2)               | 1993 (1), 1995 (1) | PH (1), SG (1)    |
| 71  | 2 | CN (2) | 01 AE (2)           | 2007 (2)           | SH (2)            |
| 72  | 2 | CN (2) | 01 AE (2)           | 2007 (1), 2009 (1) | MSM (1), SH (1)   |
| 73  | 2 | CN (2) | 07 BC (2)           | N/A (2)            | N/A (2)           |
| 74  | 2 | CN (2) | B (2)               | 2004 (2)           | N/A (1), PB (1)   |
| 75  | 2 | CN (2) | 01 AE (2)           | 2009 (1), 2010 (1) | MSM (2)           |
| 76  | 2 | TH (2) | 01 AE (2)           | 2006 (2)           | N/A (2)           |
| 77  | 2 | SG (2) | 01 AE (2)           | 2008 (1), 2009 (1) | N/A (2)           |
| 78  | 2 | JP (2) | B (2)               | N/A (2)            | N/A (2)           |
| 79  | 2 | JP (2) | B (1), BF (1)       | 2004 (1), N/A (1)  | N/A (2)           |
| 80  | 2 | TH (2) | 01 AE (2)           | 2006 (2)           | N/A (2)           |
| 81  | 2 | CN (2) | 85 BC (2)           | 2014 (2)           | SH (2)            |
| 82  | 2 | TH (2) | 01B (2)             | 2006 (2)           | N/A (2)           |
| 83  | 2 | MY (2) | 58 01B (2)          | 2011 (2)           | PWID (2)          |
| 84  | 2 | TH (2) | 01 AE (2)           | 2000 (1), N/A (1)  | N/A (2)           |
| 85  | 2 | JP (2) | 01 AE (2)           | N/A (2)            | N/A (2)           |
| 86  | 2 | TH (2) | 01 AE (2)           | 2006 (2)           | N/A (2)           |
| 87  | 2 | TH (2) | 34 01B (2)          | 1999 (2)           | PWID (2)          |
| 88  | 2 | TH (2) | 01 AE (2)           | 2006 (2)           | N/A (2)           |
| 89  | 2 | CN (2) | BC (1), C (1)       | 2007 (2)           | PWID (2)          |
| 90  | 2 | CN (2) | 07 BC (2)           | 2004 (1), 2006 (1) | PWID (2)          |
| 91  | 2 | CN (2) | 01 AE (2)           | 2006 (2)           | N/A (1), PWID (1) |
| 92  | 2 | TH (2) | 01 AE (2)           | 2002 (2)           | PWID (2)          |
| 93  | 2 | TH (2) | 01B (2)             | 2005 (1), 2007 (1) | N/A (2)           |
| 94  | 2 | TH (2) | 01 AE (2)           | 1999 (2)           | N/A (1), PWID (1) |
| 95  | 2 | TH (2) | 01 AE (2)           | 2005 (1), 2006 (1) | N/A (1), SH (1)   |
| 96  | 2 | TH (2) | 01 AE (2)           | 1999 (1), N/A (1)  | N/A (2)           |
| 97  | 2 | CN (2) | 07 BC (2)           | 2007 (2)           | SH (2)            |
| 98  | 2 | TH (2) | 01 AE (2)           | 2009 (2)           | N/A (2)           |
| 99  | 2 | CN (2) | 08 BC (1), C (1)    | 2007 (2)           | N/A (1), PWID (1) |
| 100 | 2 | CN (2) | 08 BC (2)           | 2007 (2)           | N/A (2)           |
| 101 | 2 | TW (2) | 07 BC (1), 07B (1)  | 2004 (2)           | PWID (2)          |
| 102 | 2 | TH (2) | 01 AE (2)           | 2006 (2)           | N/A (2)           |
| 103 | 2 | CN (2) | 07 BC (1), BC (1)   | 2007 (2)           | N/A (1), PWID (1) |
| 104 | 2 | CN (2) | B (2)               | 2004 (2)           | N/A (1), SH (1)   |
| 105 | 2 | TH (2) | 01 AE (2)           | 1999 (1), 2000 (1) | N/A (2)           |
| 106 | 2 | TH (2) | 01 AE (2)           | 1999 (1), 2000 (1) | N/A (2)           |
| 107 | 2 | CN (2) | 07 BC (2)           | 2005 (2)           | PWID (1), SH (1)  |
| 108 | 2 | JP (2) | B (2)               | N/A (2)            | N/A (2)           |
| 109 | 2 | CN (2) | 08 BC (2)           | 2007 (2)           | N/A (1), PWID (1) |
| 110 | 2 | TH (2) | 01 AE (2)           | 2006 (2)           | N/A (2)           |
| 111 | 2 | TH (2) | B (2)               | 2010 (2)           | MSM (1), N/A (1)  |
| 112 | 2 | KR (2) | B (2)               | 2009 (2)           | MSM (1), N/A (1)  |
| 113 | 2 | KR (2) | B (2)               | 2009 (2)           | MSM (1), SH (1)   |
| 114 | 2 | TH (2) | 01 AE (2)           | 2009 (2)           | MSM (2)           |
| 115 | 2 | CN (2) | 01 AE (2)           | 2007 (1), 2010 (1) | MSM (1), SH (1)   |
| 116 | 2 | CN (2) | 01 AE (2)           | 2007 (2)           | PWID (2)          |
| 117 | 2 | CN (2) | 01 AE (2)           | 2005 (1), 2009 (1) | N/A (1), SH (1)   |
| 118 | 2 | CN (2) | 01 AE (2)           | 2005 (1), 2006 (1) | N/A (1), PWID (1) |
| 119 | 2 | CN (2) | 59 01B (2)          | 2009 (1), 2011 (1) | MSM (2)           |
| 120 | 2 | IN (2) | C (2)               | 2014 (1), 2015 (1) | MB (1), N/A (1)   |
| 121 | 2 | TH (2) | 01 AE (2)           | 2001 (2)           | PWID (2)          |
| 122 | 2 | TH (2) | 01 AE (2)           | 1999 (2)           | PWID (2)          |
| 123 | 2 | JP (2) | 69 01B (1), 01B (1) | 2003 (1), 2005 (1) | MSM (2)           |

**Table S6. Nodes in Asian HIV-1 transmission network**

a) Summary of nodes in transmission network (n=348)

| <b>Country</b>                  | <b>n</b> | <b>%</b> |
|---------------------------------|----------|----------|
| China (CN)                      | 162      | 46.6%    |
| Thailand (TH)                   | 98       | 28.2%    |
| Japan (JP)                      | 27       | 7.8%     |
| South Korea (KR)                | 16       | 4.6%     |
| Myanmar (MM)                    | 14       | 4.0%     |
| Vietnam (VN)                    | 12       | 3.4%     |
| Singapore (SG)                  | 7        | 2.0%     |
| Pakistan (PK)                   | 4        | 1.1%     |
| Malaysia (MY)                   | 3        | 0.9%     |
| India (IN)                      | 2        | 0.6%     |
| Taiwan (TW)                     | 2        | 0.6%     |
| Indonesia (ID)                  | 1        | 0.3%     |
| <b>Subtype</b>                  | <b>n</b> | <b>%</b> |
| 01_AE                           | 162      | 46.6%    |
| B                               | 57       | 16.4%    |
| 07_BC                           | 32       | 9.2%     |
| 08_BC                           | 29       | 8.3%     |
| 01B                             | 11       | 3.2%     |
| 83_cpx                          | 9        | 2.6%     |
| BC                              | 9        | 2.6%     |
| C                               | 8        | 2.3%     |
| 82_cpx                          | 5        | 1.4%     |
| 69_01B                          | 4        | 1.1%     |
| 55_01B                          | 3        | 0.9%     |
| 34_01B                          | 2        | 0.6%     |
| 51_01B                          | 2        | 0.6%     |
| 58_01B                          | 2        | 0.6%     |
| 59_01B                          | 2        | 0.6%     |
| 64_BC                           | 2        | 0.6%     |
| 65_cpx                          | 2        | 0.6%     |
| 85_BC                           | 2        | 0.6%     |
| A1                              | 2        | 0.6%     |
| 0107                            | 1        | 0.3%     |
| 07B                             | 1        | 0.3%     |
| BFI                             | 1        | 0.3%     |
| <b>Risk Factor</b>              | <b>n</b> | <b>%</b> |
| Unknown (N/A)                   | 167      | 48.0%    |
| People who inject drugs (PWID)  | 80       | 23.0%    |
| Men who have sex with men (MSM) | 60       | 17.2%    |
| Heterosexual (SH)               | 33       | 9.5%     |
| Homosexual (SG)                 | 3        | 0.9%     |
| Nosocomial (NO)                 | 2        | 0.6%     |
| Mother to child (MB)            | 1        | 0.3%     |
| Blood transfusion (PB)          | 1        | 0.3%     |
| Hemophiliac (PH)                | 1        | 0.3%     |
| <b>Sampling Year</b>            | <b>n</b> | <b>%</b> |
| 1990                            | 4        | 1.1%     |
| 1991                            | 2        | 0.6%     |
| 1992                            | 7        | 2.0%     |
| 1993                            | 12       | 3.4%     |
| 1995                            | 2        | 0.6%     |
| 1996                            | 5        | 1.4%     |
| 1997                            | 10       | 2.9%     |
| 1998                            | 10       | 2.9%     |
| 1999                            | 14       | 4.0%     |
| 2000                            | 7        | 2.0%     |
| 2001                            | 3        | 0.9%     |
| 2002                            | 13       | 3.7%     |
| 2003                            | 4        | 1.1%     |
| 2004                            | 16       | 4.6%     |
| 2005                            | 19       | 5.5%     |

|      |    |       |
|------|----|-------|
| 2006 | 31 | 8.9%  |
| 2007 | 63 | 18.1% |
| 2008 | 10 | 2.9%  |
| 2009 | 37 | 10.6% |
| 2010 | 13 | 3.7%  |
| 2011 | 7  | 2.0%  |
| 2012 | 4  | 1.1%  |
| 2013 | 18 | 5.2%  |
| 2014 | 6  | 1.7%  |
| 2015 | 5  | 1.4%  |
| N/A  | 26 | 7.5%  |

b) Detailed list of nodes in transmission network

| Network ID | Country Code | Subtype | Sampling Year | Risk Factor | Name               | Accession |
|------------|--------------|---------|---------------|-------------|--------------------|-----------|
| CN001      | CN           | 0107    | 2007          | SG          | JL070032           | KC990127  |
| CN002      | CN           | 01 AE   | 1997          | PWID        | 97CNGX2F 97CNGX 2F | AY008714  |
| CN003      | CN           | 01 AE   | 1997          | PWID        | 97CNGX 11F         | AY008718  |
| CN004      | CN           | 01 AE   | N/A           | N/A         | GX E 14            | AY217545  |
| CN005      | CN           | 01 AE   | 2005          | SH          | FJ051              | DQ859178  |
| CN006      | CN           | 01 AE   | 1999          | NO          | AE01               | EU363849  |
| CN007      | CN           | 01 AE   | 2007          | N/A         | BJ5 11             | GU475024  |
| CN008      | CN           | 01 AE   | 2005          | SH          | 05GX002            | GU564222  |
| CN009      | CN           | 01 AE   | 2007          | MSM         | BJOX015000 11 5    | HM215377  |
| CN010      | CN           | 01 AE   | 2007          | MSM         | BJOX018000 02 3    | HM215379  |
| CN011      | CN           | 01 AE   | 2007          | MSM         | BJOX021000 03 3    | HM215383  |
| CN012      | CN           | 01 AE   | 2007          | MSM         | BJOX025000 01 1    | HM215386  |
| CN013      | CN           | 01 AE   | 2007          | PWID        | CNE28              | HM215409  |
| CN014      | CN           | 01 AE   | 2007          | PWID        | CNE56              | HM215419  |
| CN015      | CN           | 01 AE   | 2006          | PWID        | CNE59              | HM215422  |
| CN016      | CN           | 01 AE   | 2005          | MSM         | CNE62              | HM215424  |
| CN017      | CN           | 01 AE   | 2006          | PWID        | CNE8               | HM215427  |
| CN018      | CN           | 01 AE   | 2007          | N/A         | CNE26              | HQ699955  |
| CN019      | CN           | 01 AE   | 2007          | N/A         | CNE27              | HQ699956  |
| CN020      | CN           | 01 AE   | 2005          | N/A         | CNE60              | HQ699977  |
| CN021      | CN           | 01 AE   | 2007          | PWID        | CNE107             | HQ699986  |
| CN022      | CN           | 01 AE   | 2005          | N/A         | CNE61 U            | HQ699987  |
| CN023      | CN           | 01 AE   | 2006          | N/A         | CNE91 U            | HQ699993  |
| CN024      | CN           | 01 AE   | 2010          | MSM         | CYM105             | JX112798  |
| CN025      | CN           | 01 AE   | 2010          | MSM         | CYM152             | JX112807  |
| CN026      | CN           | 01 AE   | 2007          | SH          | FJ070013           | JX112810  |
| CN027      | CN           | 01 AE   | 2007          | SH          | FJ070039           | JX112816  |
| CN028      | CN           | 01 AE   | 2007          | N/A         | GZ070015           | JX112841  |
| CN029      | CN           | 01 AE   | 2007          | PWID        | GZ070016           | JX112842  |
| CN030      | CN           | 01 AE   | 2007          | SH          | JS071004           | JX112852  |
| CN031      | CN           | 01 AE   | 2007          | SH          | LN070013           | JX112856  |
| CN032      | CN           | 01 AE   | 2007          | MSM         | TJ070003           | JX112859  |
| CN033      | CN           | 01 AE   | 2002          | SH          | YN0203             | JX112860  |
| CN034      | CN           | 01 AE   | 2002          | SH          | YN0225             | JX112862  |
| CN035      | CN           | 01 AE   | 2002          | PWID        | YN0229             | JX112863  |
| CN036      | CN           | 01 AE   | 2002          | SH          | YN0232             | JX112864  |
| CN037      | CN           | 01 AE   | 2002          | SH          | YN0235             | JX112865  |
| CN038      | CN           | 01 AE   | 2009          | N/A         | ZK052              | JX112869  |
| CN039      | CN           | 01 AE   | 2009          | MSM         | 09LNA008           | JX960604  |
| CN040      | CN           | 01 AE   | 2009          | MSM         | 09LNA011           | JX960605  |
| CN041      | CN           | 01 AE   | 2008          | MSM         | 08LNA003           | JX960606  |
| CN042      | CN           | 01 AE   | 2010          | MSM         | 10LNA124           | JX960609  |
| CN043      | CN           | 01 AE   | 2010          | MSM         | 10LNA819           | JX960610  |
| CN044      | CN           | 01 AE   | 2008          | MSM         | 08LNA002           | JX960612  |
| CN045      | CN           | 01 AE   | 2009          | MSM         | 09LNA020           | JX960613  |
| CN046      | CN           | 01 AE   | 2009          | MSM         | 09LNA230           | JX960614  |
| CN047      | CN           | 01 AE   | 2008          | MSM         | 08LNA004           | JX960617  |
| CN048      | CN           | 01 AE   | 2009          | MSM         | 09LNA041           | JX960618  |
| CN049      | CN           | 01 AE   | 2010          | MSM         | 10LNA294           | JX960619  |
| CN050      | CN           | 01 AE   | 2010          | MSM         | 10LNA918           | JX960620  |
| CN051      | CN           | 01 AE   | 2009          | MSM         | 09LNA425           | JX960621  |
| CN052      | CN           | 01 AE   | 2009          | MSM         | 09LNA013           | JX960623  |

|       |    |       |      |      |                    |          |
|-------|----|-------|------|------|--------------------|----------|
| CN053 | CN | 01 AE | 2010 | MSM  | 10LNA669           | JX960624 |
| CN054 | CN | 01 AE | 2011 | MSM  | DE00111CN003       | KC596065 |
| CN055 | CN | 01 AE | 2008 | SH   | BJOX033000.e01     | KM218302 |
| CN056 | CN | 01 AE | 2009 | MSM  | DE00109CN005       | KP109504 |
| CN057 | CN | 01 AE | 2005 | SH   | GX2005002          | KP178420 |
| CN058 | CN | 01B   | 2013 | MSM  | BJMP3037B          | KP418805 |
| CN059 | CN | 01B   | 2013 | MSM  | BJMP3194B          | KP418806 |
| CN060 | CN | 07 BC | 1997 | PWID | 97CN001 C54        | AF286226 |
| CN061 | CN | 07 BC | 1998 | N/A  | 98CN009            | AF286230 |
| CN062 | CN | 07 BC | N/A  | N/A  | CNGL179            | AF503396 |
| CN063 | CN | 07 BC | 2005 | SH   | XJDC6441           | EF368370 |
| CN064 | CN | 07 BC | 2005 | PWID | XJN0084            | EF368371 |
| CN065 | CN | 07 BC | 2005 | PWID | pXJDC6441-2        | EF420986 |
| CN066 | CN | 07 BC | N/A  | PWID | BC02_XJ74_2        | EU363832 |
| CN067 | CN | 07 BC | 2007 | MSM  | BJOX011000_01_3    | HM215375 |
| CN068 | CN | 07 BC | 2007 | MSM  | BJOX019000_02_1    | HM215380 |
| CN069 | CN | 07 BC | 2007 | MSM  | BJOX027000_02_1    | HM215388 |
| CN070 | CN | 07 BC | 2007 | MSM  | BJOX029000_03_1    | HM215392 |
| CN071 | CN | 07 BC | 2007 | SH   | CNE19              | HM215405 |
| CN072 | CN | 07 BC | 2007 | SH   | CNE20              | HM215406 |
| CN073 | CN | 07 BC | N/A  | N/A  | BJ22_5             | HQ326125 |
| CN074 | CN | 07 BC | N/A  | N/A  | XJ16_6             | HQ326133 |
| CN075 | CN | 07 BC | N/A  | N/A  | XJ47_5             | HQ326134 |
| CN076 | CN | 07 BC | N/A  | N/A  | GX33m_25           | HQ326141 |
| CN077 | CN | 07 BC | N/A  | N/A  | GX45_57            | HQ326143 |
| CN078 | CN | 07 BC | 2007 | N/A  | CNE39              | HQ699965 |
| CN079 | CN | 07 BC | 2007 | SH   | CNE68              | HQ699982 |
| CN080 | CN | 07 BC | 2007 | N/A  | CNE69              | HQ699983 |
| CN081 | CN | 07 BC | 2007 | N/A  | CNE70              | HQ699984 |
| CN082 | CN | 07 BC | 2004 | PWID | CBJA025            | JF346905 |
| CN083 | CN | 07 BC | 2006 | PWID | Sichuan_2006_SC020 | JX392380 |
| CN084 | CN | 07 BC | 2006 | PWID | Sichuan_2006_SC025 | JX392381 |
| CN085 | CN | 07 BC | 2006 | PWID | Sichuan_2006_SC124 | JX392382 |
| CN086 | CN | 07 BC | 2009 | MSM  | 09LNA446           | JX960600 |
| CN087 | CN | 07 BC | 2007 | MSM  | BJ070032           | KF250366 |
| CN088 | CN | 07 BC | 2007 | MSM  | GZ070087           | KF250372 |
| CN089 | CN | 07 BC | 2007 | MSM  | BJOX016000.e02     | KM217857 |
| CN090 | CN | 07 BC | 2008 | MSM  | BJOX037000.e01     | KM218157 |
| CN091 | CN | 08 BC | 1998 | N/A  | 98CN006            | AF286229 |
| CN092 | CN | 08 BC | 1997 | PWID | 97CNGX_6F          | AY008715 |
| CN093 | CN | 08 BC | 1997 | PWID | 97CNGX_7F          | AY008716 |
| CN094 | CN | 08 BC | 1997 | PWID | 97CNGX_9F          | AY008717 |
| CN095 | CN | 08 BC | 2007 | PWID | CNE52              | HM215416 |
| CN096 | CN | 08 BC | 2007 | PWID | CNE53              | HM215417 |
| CN097 | CN | 08 BC | 2007 | N/A  | CNE22              | HQ699952 |
| CN098 | CN | 08 BC | 2007 | N/A  | CNE24              | HQ699953 |
| CN099 | CN | 08 BC | 2007 | N/A  | CNE25              | HQ699954 |
| CN100 | CN | 08 BC | 2007 | N/A  | CNE29              | HQ699957 |
| CN101 | CN | 08 BC | 2007 | N/A  | CNE32              | HQ699958 |
| CN102 | CN | 08 BC | 2007 | N/A  | CNE33              | HQ699959 |
| CN103 | CN | 08 BC | 2007 | N/A  | CNE35              | HQ699961 |
| CN104 | CN | 08 BC | 2007 | N/A  | CNE36              | HQ699962 |
| CN105 | CN | 08 BC | 2007 | N/A  | CNE37              | HQ699963 |
| CN106 | CN | 08 BC | 2007 | N/A  | CNE38              | HQ699964 |
| CN107 | CN | 08 BC | 2007 | N/A  | CNE41              | HQ699966 |
| CN108 | CN | 08 BC | 2007 | N/A  | CNE42              | HQ699967 |
| CN109 | CN | 08 BC | 2007 | N/A  | CNE43              | HQ699968 |
| CN110 | CN | 08 BC | 2007 | N/A  | CNE44              | HQ699969 |
| CN111 | CN | 08 BC | 2007 | N/A  | CNE45              | HQ699970 |
| CN112 | CN | 08 BC | 2007 | PWID | CNE46              | HQ699971 |
| CN113 | CN | 08 BC | 2007 | PWID | CNE47              | HQ699972 |
| CN114 | CN | 08 BC | 2007 | N/A  | CNE48              | HQ699973 |
| CN115 | CN | 08 BC | 2007 | PWID | CNE49              | HQ699974 |
| CN116 | CN | 08 BC | 2007 | N/A  | CNE50              | HQ699975 |
| CN117 | CN | 08 BC | 2007 | N/A  | CNE54              | HQ699976 |
| CN118 | CN | 08 BC | 2007 | N/A  | CNE51              | HQ700004 |

|       |    |        |      |      |                            |          |
|-------|----|--------|------|------|----------------------------|----------|
| CN119 | CN | 08 BC  | 2007 | PWID | 2007CNGX HK                | JF719819 |
| CN120 | CN | 55 01B | 2010 | MSM  | HNCS102056                 | JX574661 |
| CN121 | CN | 55 01B | 2011 | MSM  | 11HNCS500434               | KF927150 |
| CN122 | CN | 55 01B | 2011 | MSM  | 11CN.GDDG325               | KF927151 |
| CN123 | CN | 59 01B | 2009 | MSM  | 09LNA423                   | JX960635 |
| CN124 | CN | 59 01B | 2011 | MSM  | 11LNSY300392               | KC462190 |
| CN125 | CN | 64 BC  | 2009 | PWID | YNFL08                     | KC870031 |
| CN126 | CN | 64 BC  | 2009 | PWID | 09YNLX047sg                | KC898994 |
| CN127 | CN | 65 cpx | 2010 | SH   | YNFL02                     | KC870028 |
| CN128 | CN | 65 cpx | 2009 | SH   | YNFL05                     | KC870030 |
| CN129 | CN | 85 BC  | 2014 | SH   | 14CN SCYB3                 | KU992931 |
| CN130 | CN | 85 BC  | 2014 | SH   | 14CN SCYB11                | KU992935 |
| CN131 | CN | B      | 2004 | N/A  | CHNHLJSM0417c3             | AY905496 |
| CN132 | CN | B      | 2004 | N/A  | CHNHLJBF04016c4            | AY905497 |
| CN133 | CN | B      | 2002 | N/A  | 02HNsmx2                   | DQ007901 |
| CN134 | CN | B      | 2002 | N/A  | 02HNsq4                    | DQ007902 |
| CN135 | CN | B      | 2002 | N/A  | 02HNsc11                   | DQ007903 |
| CN136 | CN | B      | 2003 | NO   | B02                        | EU363826 |
| CN137 | CN | B      | 2004 | SH   | CNE12                      | HM215399 |
| CN138 | CN | B      | 2004 | SH   | CNE14                      | HM215400 |
| CN139 | CN | B      | 2006 | PWID | CNE6                       | HM215423 |
| CN140 | CN | B      | 2004 | N/A  | CNE13                      | HQ699951 |
| CN141 | CN | B      | 2004 | N/A  | CNE63                      | HQ699978 |
| CN142 | CN | B      | 2004 | PB   | CNE64                      | HQ699979 |
| CN143 | CN | B      | 2005 | N/A  | CNE101 U                   | HQ699998 |
| CN144 | CN | B      | 2007 | N/A  | CNE105 U                   | HQ700000 |
| CN145 | CN | B      | 2012 | N/A  | 2124-0-1                   | KX693054 |
| CN146 | CN | B      | 2012 | N/A  | 2259-1                     | KX693100 |
| CN147 | CN | B      | 2012 | N/A  | 2360-0-1a                  | KX693166 |
| CN148 | CN | B      | 2012 | N/A  | 3617-1                     | KX693357 |
| CN149 | CN | B      | N/A  | PWID | RL42                       | U71182   |
| CN150 | CN | BC     | 1996 | PWID | YNRL9607                   | AY967804 |
| CN151 | CN | BC     | 1996 | PWID | YNRL9618                   | AY967807 |
| CN152 | CN | BC     | 2007 | PWID | CNE40                      | HM215414 |
| CN153 | CN | BC     | 2007 | PWID | 07YNLC18sg                 | KC898983 |
| CN154 | CN | BC     | 2009 | PWID | 09YNLC10sg                 | KC898984 |
| CN155 | CN | BC     | 2009 | PWID | 09YNLC494sg                | KC898990 |
| CN156 | CN | BC     | 1996 | PWID | YN3018                     | KF250378 |
| CN157 | CN | BC     | 1996 | PWID | YN4007                     | KF250379 |
| CN158 | CN | BC     | 1996 | PWID | YN4018                     | KF250380 |
| CN159 | CN | C      | N/A  | N/A  | GX C 14                    | AY217546 |
| CN160 | CN | C      | 2007 | PWID | CNE23                      | HM215408 |
| CN161 | CN | C      | 2007 | PWID | CNE30                      | HM215411 |
| CN162 | CN | C      | 2007 | PWID | CNE65                      | HQ699980 |
| ID001 | ID | 01 AE  | 1993 | N/A  | ID17                       | AB485652 |
| IN001 | IN | C      | 2015 | N/A  | NIRT002                    | KX069220 |
| IN002 | IN | C      | 2014 | MB   | NIRT ENV009                | KX756608 |
| JP001 | JP | 01 AE  | 1993 | SH   | 93JP NH1                   | AB052995 |
| JP002 | JP | 01 AE  | 1993 | SH   | NH25 93JPNH25T 93JP NH2 5T | AB070352 |
| JP003 | JP | 01 AE  | N/A  | N/A  | DR0492                     | AB253423 |
| JP004 | JP | 01 AE  | N/A  | N/A  | DR1741                     | AB253635 |
| JP005 | JP | 01 AE  | N/A  | N/A  | DR1873                     | AB253647 |
| JP006 | JP | 01 AE  | N/A  | N/A  | DR1236                     | AB253692 |
| JP007 | JP | 01 AE  | N/A  | N/A  | DR2192                     | AB253703 |
| JP008 | JP | 01B    | 2003 | MSM  | 03JP-5091K279              | AB859012 |
| JP009 | JP | 69 01B | 2003 | MSM  | 03JP-5091K231              | AB845344 |
| JP010 | JP | 69 01B | 2004 | MSM  | 04JP-5091K320              | AB845345 |
| JP011 | JP | 69 01B | 2004 | MSM  | 04JP-5091K323              | AB845346 |
| JP012 | JP | 69 01B | 2005 | MSM  | 05JP-5091K448              | AB845347 |
| JP013 | JP | B      | 2004 | N/A  | DR6089                     | AB286955 |
| JP014 | JP | B      | 2002 | N/A  | 194                        | AB428553 |
| JP015 | JP | B      | 2002 | N/A  | 197                        | AB428554 |
| JP016 | JP | B      | 2003 | N/A  | 285                        | AB428558 |
| JP017 | JP | B      | 2004 | N/A  | 329                        | AB428559 |
| JP018 | JP | B      | 2005 | N/A  | 398                        | AB428560 |
| JP019 | JP | B      | 2006 | N/A  | 472                        | AB428561 |

|       |    |        |      |      |                             |          |
|-------|----|--------|------|------|-----------------------------|----------|
| JP020 | JP | B      | 2006 | N/A  | 574                         | AB428562 |
| JP021 | JP | B      | N/A  | N/A  | DR1673                      | AB564744 |
| JP022 | JP | B      | N/A  | N/A  | DR2735                      | AB564746 |
| JP023 | JP | B      | N/A  | N/A  | pJPDR0796B02                | AB565478 |
| JP024 | JP | B      | N/A  | N/A  | JRC03B                      | AB565495 |
| JP025 | JP | B      | N/A  | N/A  | JRC53B                      | AB565499 |
| JP026 | JP | B      | N/A  | N/A  | DR5929                      | AB604950 |
| JP027 | JP | BF1    | N/A  | N/A  | DR0769                      | AB253430 |
| KR001 | KR | B      | 1995 | PH   | HP-5 95PJH6-10862           | KJ140250 |
| KR002 | KR | B      | 2009 | MSM  | KOR HIV Env-1               | KT878021 |
| KR003 | KR | B      | 2009 | MSM  | KOR HIV Env-13              | KT878033 |
| KR004 | KR | B      | 2009 | N/A  | KOR HIV Env-14              | KT878034 |
| KR005 | KR | B      | 2009 | SH   | KOR HIV Env-20              | KT878040 |
| KR006 | KR | B      | 1993 | SG   | Donor-P-93KPS10-13295 13289 | KU869532 |
| KR007 | KR | B      | 1992 | SH   | 92KYJ5-13316                | KU869580 |
| KR008 | KR | B      | 1993 | N/A  | 93GHS5-13309                | KU869597 |
| KR009 | KR | B      | 1992 | N/A  | 92DGi6-13344                | KU869604 |
| KR010 | KR | B      | 1992 | N/A  | 92JYO12-13400               | KU896119 |
| KR011 | KR | B      | 1991 | N/A  | 91KYB12-15320 15293 15314   | KX960966 |
| KR012 | KR | B      | 1991 | N/A  | 91LGJ11-15285 15339 15331   | KX960967 |
| KR013 | KR | B      | 1992 | N/A  | 92HJiH1-15292 15294 15318   | KX960968 |
| KR014 | KR | B      | 1992 | N/A  | 92PGJ4-15289 15291 15312    | KX960969 |
| KR015 | KR | B      | 1993 | N/A  | 93PCKy3-15236               | KX960972 |
| KR016 | KR | B      | 1995 | N/A  | 95KJHw4-15335               | KX960974 |
| MM001 | MM | 82 cpx | 2013 | PWID | mSSDU12                     | KU820825 |
| MM002 | MM | 82 cpx | 2013 | PWID | mSSDU191                    | KU820836 |
| MM003 | MM | 82 cpx | 2013 | PWID | mSSDU195                    | KU820837 |
| MM004 | MM | 82 cpx | 2013 | PWID | mSSDU63                     | KU820844 |
| MM005 | MM | 82 cpx | 2013 | PWID | mSSDU75                     | KU820845 |
| MM006 | MM | 83 cpx | 2013 | PWID | mSSDU118                    | KU820824 |
| MM007 | MM | 83 cpx | 2013 | PWID | mSSDU137                    | KU820826 |
| MM008 | MM | 83 cpx | 2013 | PWID | mSSDU144                    | KU820828 |
| MM009 | MM | 83 cpx | 2013 | PWID | mSSDU151                    | KU820829 |
| MM010 | MM | 83 cpx | 2013 | PWID | mSSDU178                    | KU820833 |
| MM011 | MM | 83 cpx | 2013 | PWID | mSSDU180                    | KU820834 |
| MM012 | MM | 83 cpx | 2013 | PWID | mSSDU21                     | KU820839 |
| MM013 | MM | 83 cpx | 2013 | PWID | mSSDU24                     | KU820842 |
| MM014 | MM | 83 cpx | 2013 | PWID | mSSDU94                     | KU820847 |
| MY001 | MY | 51 01B | 2009 | N/A  | 09MYKL050                   | KJ485698 |
| MY002 | MY | 58 01B | 2011 | PWID | 11MY1ZK731                  | KC522032 |
| MY003 | MY | 58 01B | 2011 | PWID | 11MY1EP794                  | KC522034 |
| PK001 | PK | A1     | 2015 | PWID | PK026                       | KX232618 |
| PK002 | PK | A1     | 2014 | PWID | PK027                       | KX232619 |
| PK003 | PK | C      | 2014 | SH   | DEMC14PK009                 | KU749412 |
| PK004 | PK | C      | 2014 | MSM  | PK010                       | KX232603 |
| SG001 | SG | 01 AE  | 2008 | N/A  | HM033                       | KY213722 |
| SG002 | SG | 01 AE  | 2008 | N/A  | HM067                       | KY213726 |
| SG003 | SG | 01 AE  | 2009 | N/A  | HMI32F                      | KY213729 |
| SG004 | SG | 01 AE  | 2008 | N/A  | HM018                       | KY213730 |
| SG005 | SG | 51 01B | 2011 | SG   | 11SG HM021                  | JN029801 |
| SG006 | SG | B      | 2008 | N/A  | HM024                       | KY213741 |
| SG007 | SG | B      | 2009 | N/A  | HM151                       | KY213744 |
| TH001 | TH | 01 AE  | 1993 | N/A  | 93TH051                     | AB220944 |
| TH002 | TH | 01 AE  | 1993 | N/A  | 93TH054                     | AB220945 |
| TH003 | TH | 01 AE  | 1993 | N/A  | 93TH060                     | AB220946 |
| TH004 | TH | 01 AE  | 1993 | N/A  | 93TH062                     | AB220947 |
| TH005 | TH | 01 AE  | 1993 | PWID | 93TH065                     | AB220948 |
| TH006 | TH | 01 AE  | 1993 | PWID | 93TH057                     | AB253424 |
| TH007 | TH | 01 AE  | 1990 | SH   | CM235                       | AF259954 |
| TH008 | TH | 01 AE  | 2001 | PWID | OUR786I                     | AY358036 |
| TH009 | TH | 01 AE  | 2002 | PWID | OUR737I                     | AY358037 |
| TH010 | TH | 01 AE  | 2001 | PWID | OUR674I                     | AY358038 |
| TH011 | TH | 01 AE  | 1999 | PWID | OUR199I                     | AY358039 |
| TH012 | TH | 01 AE  | 1999 | PWID | OUR066I                     | AY358043 |
| TH013 | TH | 01 AE  | 1999 | PWID | OUR098I                     | AY358044 |
| TH014 | TH | 01 AE  | 1999 | PWID | OUR164I                     | AY358045 |



|       |    |       |      |      |                  |          |
|-------|----|-------|------|------|------------------|----------|
| TH015 | TH | 01 AE | 2000 | PWID | OUR201I          | AY358046 |
| TH016 | TH | 01 AE | 1999 | PWID | OUR202I          | AY358047 |
| TH017 | TH | 01 AE | 1999 | PWID | OUR203I          | AY358048 |
| TH018 | TH | 01 AE | 2002 | PWID | OUR769I          | AY358062 |
| TH019 | TH | 01 AE | 1999 | N/A  | OUR008I          | AY358065 |
| TH020 | TH | 01 AE | 2000 | PWID | OUR200I          | AY358066 |
| TH021 | TH | 01 AE | 1992 | SH   | 92TH00I          | AY494968 |
| TH022 | TH | 01 AE | 1990 | N/A  | 90TH_CM244       | AY713425 |
| TH023 | TH | 01 AE | 1990 | SH   | 90TH_CM240       | AY736838 |
| TH024 | TH | 01 AE | 2004 | N/A  | BKD              | DQ314731 |
| TH025 | TH | 01 AE | 2004 | N/A  | BKM              | DQ314732 |
| TH026 | TH | 01 AE | 2006 | N/A  | 41CC1            | EU743763 |
| TH027 | TH | 01 AE | 2006 | N/A  | 41PB3            | EU743764 |
| TH028 | TH | 01 AE | 2006 | N/A  | 45CC1            | EU743765 |
| TH029 | TH | 01 AE | 2006 | N/A  | 45PB1            | EU743766 |
| TH030 | TH | 01 AE | 2006 | N/A  | 47CC11           | EU743767 |
| TH031 | TH | 01 AE | 2006 | N/A  | 47PL1            | EU743768 |
| TH032 | TH | 01 AE | 2006 | N/A  | 52PB3            | EU743771 |
| TH033 | TH | 01 AE | 2006 | N/A  | 52PL4            | EU743772 |
| TH034 | TH | 01 AE | 2006 | N/A  | 52PL7            | EU743773 |
| TH035 | TH | 01 AE | 2006 | N/A  | 60PB2            | EU743776 |
| TH036 | TH | 01 AE | 2006 | N/A  | 60PL2            | EU743777 |
| TH037 | TH | 01 AE | 2006 | N/A  | 65CC1            | EU743779 |
| TH038 | TH | 01 AE | 2006 | N/A  | 65CC4            | EU743780 |
| TH039 | TH | 01 AE | 2006 | N/A  | 98CC2            | EU743782 |
| TH040 | TH | 01 AE | 2006 | N/A  | 98CC3            | EU743783 |
| TH041 | TH | 01 AE | 2006 | N/A  | 99CC8            | EU743785 |
| TH042 | TH | 01 AE | 2006 | N/A  | 99PB2            | EU743786 |
| TH043 | TH | 01 AE | 2006 | N/A  | 105PB1           | EU743791 |
| TH044 | TH | 01 AE | 2006 | N/A  | 105PL3           | EU743793 |
| TH045 | TH | 01 AE | 2005 | SH   | 703357_c02       | JN944658 |
| TH046 | TH | 01 AE | 1990 | SH   | CM246_c1         | JN944663 |
| TH047 | TH | 01 AE | 2008 | N/A  | AA007a_WG1       | JX446755 |
| TH048 | TH | 01 AE | 2005 | N/A  | AA051a01R        | JX447294 |
| TH049 | TH | 01 AE | 2006 | N/A  | AA100b07R        | JX447902 |
| TH050 | TH | 01 AE | N/A  | N/A  | 107747_048       | JX848346 |
| TH051 | TH | 01 AE | N/A  | N/A  | 113035_007       | JX848348 |
| TH052 | TH | 01 AE | 2009 | N/A  | RTA2-env         | KF268035 |
| TH053 | TH | 01 AE | 2009 | N/A  | RTA4-env         | KF268037 |
| TH054 | TH | 01 AE | 2009 | N/A  | RTA5-env         | KF268038 |
| TH055 | TH | 01 AE | 2009 | N/A  | RTA6-env         | KF268039 |
| TH056 | TH | 01 AE | 2009 | N/A  | RTA8-env         | KF268040 |
| TH057 | TH | 01 AE | 2009 | N/A  | RTA9-env         | KF268041 |
| TH058 | TH | 01 AE | 2009 | N/A  | RTA11-env        | KF268042 |
| TH059 | TH | 01 AE | 2009 | N/A  | RTA21-env        | KF268045 |
| TH060 | TH | 01 AE | 2009 | N/A  | RTA23-env        | KF268046 |
| TH061 | TH | 01 AE | 2009 | N/A  | RTA24-env        | KF268047 |
| TH062 | TH | 01 AE | 2009 | N/A  | RTA27-env        | KF268048 |
| TH063 | TH | 01 AE | 2000 | N/A  | 3002B01.A12      | KJ952242 |
| TH064 | TH | 01 AE | N/A  | N/A  | 3017F5.A1        | KJ952314 |
| TH065 | TH | 01 AE | 2000 | N/A  | 3090A02.C6       | KJ952765 |
| TH066 | TH | 01 AE | 2000 | N/A  | 3111A02.A2       | KJ952897 |
| TH067 | TH | 01 AE | 2000 | N/A  | 3112A02.A1       | KJ952917 |
| TH068 | TH | 01 AE | N/A  | N/A  | 3141A16.B2       | KJ953175 |
| TH069 | TH | 01 AE | 1999 | N/A  | 3151A16.A2       | KJ953229 |
| TH070 | TH | 01 AE | 1999 | N/A  | 3184A08.B1       | KJ953408 |
| TH071 | TH | 01 AE | 1999 | N/A  | 3210A08.D22      | KJ953596 |
| TH072 | TH | 01 AE | 1999 | N/A  | 3212A10.B10      | KJ953611 |
| TH073 | TH | 01 AE | 2000 | N/A  | 3219A08.D1       | KJ953664 |
| TH074 | TH | 01 AE | 1992 | SH   | TH023            | KU562843 |
| TH075 | TH | 01 AE | 2013 | MSM  | 2544233P000FL_Sa | MG989508 |
| TH076 | TH | 01 AE | 2010 | MSM  | 2545374P000FL_Sj | MG989517 |
| TH077 | TH | 01 AE | 2015 | MSM  | 2547188P000FL_Sk | MG989534 |
| TH078 | TH | 01 AE | 2015 | MSM  | 2548453P000FL_Sa | MG989553 |
| TH079 | TH | 01 AE | 2009 | MSM  | 2545573P000R_Sd  | MG989591 |
| TH080 | TH | 01 AE | 2009 | MSM  | 2545577P000R_Sd  | MG989592 |

|       |    |        |      |      |                  |          |
|-------|----|--------|------|------|------------------|----------|
| TH081 | TH | 01 AE  | 2009 | MSM  | 2547933P000R Sa  | MG989606 |
| TH082 | TH | 01 AE  | 2010 | MSM  | 2549196P000R Sn  | MG989615 |
| TH083 | TH | 01B    | 2001 | PWID | OUR0331          | AY358071 |
| TH084 | TH | 01B    | 2002 | PWID | OUR8461          | AY358072 |
| TH085 | TH | 01B    | 2006 | N/A  | 40PB1            | EU743761 |
| TH086 | TH | 01B    | 2006 | N/A  | 40PB3            | EU743762 |
| TH087 | TH | 01B    | 2005 | N/A  | AA095a WG16      | JX447827 |
| TH088 | TH | 01B    | 2007 | N/A  | AA096a WG1       | JX447833 |
| TH089 | TH | 01B    | 2013 | MSM  | 2543499P000FL Sc | MG989494 |
| TH090 | TH | 01B    | 2015 | MSM  | 2544032P000FL Sa | MG989505 |
| TH091 | TH | 34 01B | 1999 | PWID | OUR1969P         | EF165539 |
| TH092 | TH | 34 01B | 1999 | PWID | OUR2478P         | EF165541 |
| TH093 | TH | B      | 2005 | N/A  | T286588_sga01    | JF297222 |
| TH094 | TH | B      | 2005 | N/A  | 05TH356764       | JN248344 |
| TH095 | TH | B      | 2005 | N/A  | 05TH356883       | JN248345 |
| TH096 | TH | B      | 2005 | N/A  | T286588_01       | KC749001 |
| TH097 | TH | B      | 2010 | MSM  | DEMB10TH002      | KP109514 |
| TH098 | TH | B      | 2010 | N/A  | 40353v04_01R     | KU230423 |
| TW001 | TW | 07 BC  | 2004 | PWID | TW_D3            | DQ230841 |
| TW002 | TW | 07B    | 2004 | PWID | TW_D60           | DQ230842 |
| VN001 | VN | 01 AE  | 1998 | N/A  | 98VNBG4          | FJ185228 |
| VN002 | VN | 01 AE  | 1998 | N/A  | 98VNBG5          | FJ185229 |
| VN003 | VN | 01 AE  | 1998 | N/A  | 98VNBG6          | FJ185230 |
| VN004 | VN | 01 AE  | 1998 | N/A  | 98VNBG7          | FJ185231 |
| VN005 | VN | 01 AE  | 1998 | N/A  | 98VNHD9          | FJ185232 |
| VN006 | VN | 01 AE  | 1998 | N/A  | 98VNHD10         | FJ185233 |
| VN007 | VN | 01 AE  | 1998 | N/A  | 98VNHD11         | FJ185234 |
| VN008 | VN | 01 AE  | 1998 | N/A  | 98VNND17         | FJ185236 |
| VN009 | VN | 01 AE  | 1997 | N/A  | 97VNHCM302       | FJ185238 |
| VN010 | VN | 01 AE  | 1997 | N/A  | 97VNAG216        | FJ185254 |
| VN011 | VN | 01 AE  | 1997 | N/A  | 97VNAG220        | FJ185256 |
| VN012 | VN | 01 AE  | 1997 | N/A  | 97VNAG221        | FJ185257 |
